# Supplementary material for: Machine learning for prediction of sudden cardiac death in heart failure patients with low left ventricular ejection fraction: study protocol for a retroprospective multicentre registry in China
Source: PubMed Central journal article supplement — BMJ Open. 2019 May 16;9(5):e023724. doi: 10.1136/bmjopen-2018-023724 (PMC6530409; doi:10.1136/bmjopen-2018-023724), 2019-05-16
Supplement: bmjopen-2018-023724.draft_revisions.pdf [file bmjopen-2018-023724.draft_revisions.pdf]

# BMJ Open

BMJ Open is committed to open peer review. As part of this commitment we make the peer review history of every article we publish publicly available.

When an article is published we post the peer reviewers' comments and the authors' responses online. We also post the versions of the paper that were used during peer review. These are the versions that the peer review comments apply to.

The versions of the paper that follow are the versions that were submitted during the peer review process. They are not the versions of record or the final published versions. They should not be cited or distributed as the published version of this manuscript.

BMJ Open is an open access journal and the full, final, typeset and author-corrected version of record of the manuscript is available on our site with no access controls, subscription charges or pay-per-view fees (<http://bmjopen.bmj.com>).

If you have any questions on BMJ Open's open peer review process please email [info.bmjopen@bmj.com](mailto:info.bmjopen@bmj.com)

# BMJ Open

## Machine learning for prediction of sudden cardiac death in heart failure patients with low left ventricular ejection fraction: study protocol for a retro-prospective multicentre registry in China

|                               |                                                                                                                                                                                                                                                                                                                                                                                                                                                                                                                                                                                                                                                                                                                                                                                                                                                                                                                                                                                                                                                                                                                                                                                                                                                                                                                                                                                                                                                                                                                                                                                                                                                                                                                                                                                                                                                                                                                                                                                                                                                                                                                                                                                                                                                                                                                          |
|-------------------------------|--------------------------------------------------------------------------------------------------------------------------------------------------------------------------------------------------------------------------------------------------------------------------------------------------------------------------------------------------------------------------------------------------------------------------------------------------------------------------------------------------------------------------------------------------------------------------------------------------------------------------------------------------------------------------------------------------------------------------------------------------------------------------------------------------------------------------------------------------------------------------------------------------------------------------------------------------------------------------------------------------------------------------------------------------------------------------------------------------------------------------------------------------------------------------------------------------------------------------------------------------------------------------------------------------------------------------------------------------------------------------------------------------------------------------------------------------------------------------------------------------------------------------------------------------------------------------------------------------------------------------------------------------------------------------------------------------------------------------------------------------------------------------------------------------------------------------------------------------------------------------------------------------------------------------------------------------------------------------------------------------------------------------------------------------------------------------------------------------------------------------------------------------------------------------------------------------------------------------------------------------------------------------------------------------------------------------|
| Journal:                      | <i>BMJ Open</i>                                                                                                                                                                                                                                                                                                                                                                                                                                                                                                                                                                                                                                                                                                                                                                                                                                                                                                                                                                                                                                                                                                                                                                                                                                                                                                                                                                                                                                                                                                                                                                                                                                                                                                                                                                                                                                                                                                                                                                                                                                                                                                                                                                                                                                                                                                          |
| Manuscript ID                 | bmjopen-2018-023724                                                                                                                                                                                                                                                                                                                                                                                                                                                                                                                                                                                                                                                                                                                                                                                                                                                                                                                                                                                                                                                                                                                                                                                                                                                                                                                                                                                                                                                                                                                                                                                                                                                                                                                                                                                                                                                                                                                                                                                                                                                                                                                                                                                                                                                                                                      |
| Article Type:                 | Protocol                                                                                                                                                                                                                                                                                                                                                                                                                                                                                                                                                                                                                                                                                                                                                                                                                                                                                                                                                                                                                                                                                                                                                                                                                                                                                                                                                                                                                                                                                                                                                                                                                                                                                                                                                                                                                                                                                                                                                                                                                                                                                                                                                                                                                                                                                                                 |
| Date Submitted by the Author: | 24-Apr-2018                                                                                                                                                                                                                                                                                                                                                                                                                                                                                                                                                                                                                                                                                                                                                                                                                                                                                                                                                                                                                                                                                                                                                                                                                                                                                                                                                                                                                                                                                                                                                                                                                                                                                                                                                                                                                                                                                                                                                                                                                                                                                                                                                                                                                                                                                                              |
| Complete List of Authors:     | <p>Meng, Fanqi; The First Affiliated Hospital of Nanjing Medical University, Department of Cardiology; Xiamen Cardiovascular Hospital, Xiamen University, Department of Cardiology</p> <p>Zhang, Zhihua; The First Affiliated Hospital of Nanjing Medical University,, Department of Cardiology; Jiangning Hospital Affiliated to Nanjing Medical University, Department of Cardiology</p> <p>Hou, Xiaofeng; The First Affiliated Hospital of Nanjing Medical University, Department of Cardiology</p> <p>Qian, Zhiyong; The First Affiliated Hospital of Nanjing Medical University, Department of Cardiology</p> <p>Wang, Yao; The First Affiliated Hospital of Nanjing Medical University, Department of Cardiology</p> <p>Chen, Yanhong; Wuhan Asia Heart Hospital, Department of Cardiology</p> <p>Wang, Yilian; The Second People's Hospital of Lianyungang, Department of Cardiology,</p> <p>Zhou, Ye; The Affiliated Hospital of Jiangsu University, Department of Cardiology</p> <p>Chen, Zhen; Taixing People's Hospital, Department of Cardiology</p> <p>Zhang, Xiwen; The First People's Hospital of Huaian, Department of Cardiology</p> <p>Yang, Jing; The First People's Hospital of Huaian, Department of Cardiology</p> <p>Zhang, Jinlong; The First People's Hospital of Yancheng, Department of Cardiology</p> <p>Guo, Jianghong; Rugao People's Hospital, Department of Cardiology</p> <p>Li, Kebei; The First People's Hospital of Zhangjiagang, Department of Cardiology</p> <p>Chen, Lu; The Third People's Hospital of Suzhou, Department of Cardiology</p> <p>Zhuang, Ruijuan; The Third People's Hospital of Wuxi, Department of Cardiology</p> <p>Jiang, Hai; The Second Affiliated Hospital of Nanjing Medical University, Department of Cardiology</p> <p>Zhou, Weihua; University of Southern Mississippi, School of Computing</p> <p>Tang, Shaowen; Nanjing Medical University, Department of Epidemiology</p> <p>Wei, Yongyue; Nanjing Medical University, Department of Biostatistics</p> <p>Zou, Jiangang; the First Affiliated Hospital of Nanjing Medical University, Department of Cardiology; Nanjing Medical University, Key Laboratory of Targeted Intervention of Cardiovascular Disease, Collaborative Innovation Center for Cardiovascular Disease Translational Medicine</p> |

1  
2  
3  
4  
5  
6  
7  
8  
9  
10  
11  
12  
13  
14  
15  
16  
17  
18  
19  
20  
21  
22  
23  
24  
25  
26  
27  
28  
29  
30  
31  
32  
33  
34  
35  
36  
37  
38  
39  
40  
41  
42  
43  
44  
45  
46  
47  
48  
49  
50  
51  
52  
53  
54  
55  
56  
57  
58  
59  
60

|           |                                                                                |
|-----------|--------------------------------------------------------------------------------|
| Keywords: | Heart failure < CARDIOLOGY, sudden cardiac death, machine learning, risk model |
|           |                                                                                |

SCHOLARONE™  
Manuscripts

For peer review only

1  
2  
3  
4 **Machine learning for prediction of sudden cardiac death in heart**  
5  
6 **failure patients with low left ventricular ejection fraction: study**  
7  
8 **protocol for a retro-prospective multicentre registry in China**  
9

10 Fanqi Meng,<sup>1,2</sup> Zhihua Zhang,<sup>1,3</sup> Xiaofeng Hou,<sup>1</sup> Zhiyong Qian,<sup>1</sup> Yao Wang,<sup>1</sup> Yanhong Chen,<sup>4</sup>  
11 Yilian Wang,<sup>5</sup> Ye Zhou,<sup>6</sup> Zhen Chen,<sup>7</sup> Xiwen Zhang,<sup>8</sup> Jing Yang,<sup>8</sup> Jinlong Zhang,<sup>9</sup> Jianghong  
12 Guo,<sup>10</sup> Kebei Li,<sup>11</sup> Lu Chen,<sup>12</sup> Ruijuan Zhuang,<sup>13</sup> Hai Jiang,<sup>14</sup> Weihua Zhou,<sup>15</sup> Shaowen Tang,<sup>16</sup>  
13 Yongyue Wei,<sup>17</sup> Jiangang Zou<sup>1, 18\*</sup>  
14

15 **Author affiliations**

16 <sup>1</sup>Department of Cardiology, The First Affiliated Hospital of Nanjing Medical University, Nanjing,  
17 China

18 <sup>2</sup>Department of Cardiology, Xiamen Cardiovascular Hospital, Xiamen University, Xiamen, China

19 <sup>3</sup>Department of Cardiology, Jiangning Hospital Affiliated to Nanjing Medical University, Nanjing,  
20 China

21 <sup>4</sup>Department of Cardiology, Wuhan Asia Heart Hospital, Wuhan, China

22 <sup>5</sup>Department of Cardiology, The Second People's Hospital of Lianyungang, Lianyungang, China

23 <sup>6</sup>Department of Cardiology, The Affiliated Hospital of Jiangsu University, Zhenjiang, China

24 <sup>7</sup>Department of Cardiology, Taixing People's Hospital, Taixing, China

25 <sup>8</sup>Department of Cardiology, The First People's Hospital of Huaian, Huaian, China

26 <sup>9</sup>Department of Cardiology, The First People's Hospital of Yancheng, Yancheng, China

27 <sup>10</sup>Department of Cardiology, Rugao People's Hospital, Rugao, China

28 <sup>11</sup>Department of Cardiology, The First People's Hospital of Zhangjiagang, Zhangjiagang, China

29 <sup>12</sup>Department of Cardiology, The Third People's Hospital of Suzhou, Suzhou, China

30 <sup>13</sup>Department of Cardiology, The Third People's Hospital of Wuxi, Wuxi, China

31 <sup>14</sup>Department of Cardiology, The Second Affiliated Hospital of Nanjing Medical University, Nanjing,  
32 China

33 <sup>15</sup>School of Computing, University of Southern Mississippi, Hattiesburg, USA.

34 <sup>16</sup>Department of Epidemiology, Nanjing Medical University, Nanjing, China

35 <sup>17</sup>Department of Biostatistics, Nanjing Medical University, Nanjing, China

36 <sup>18</sup>Key Laboratory of Targeted Intervention of Cardiovascular Disease, Collaborative Innovation Center  
37 for Cardiovascular Disease Translational Medicine, Nanjing Medical University, China

38  
39  
40  
41  
42  
43  
44 **\*Correspondence to**

45 Dr Jiangang Zou: Department of Cardiology, the First Affiliated Hospital of Nanjing Medical  
46 University, 300 Guangzhou Road, Nanjing, 210029, P.R.China; E-mail: [jgzou@njmu.edu.cn](mailto:jgzou@njmu.edu.cn); Tel.  
47 phone: +86 13605191407  
48  
49

50 **Keywords:** heart failure, sudden cardiac death, machine learning, risk model

51  
52  
53 **Number of words:**  
54  
55  
56  
57  
58  
59  
60

## ABSTRACT

### Introduction

Left ventricular ejection fraction (LVEF)  $\leq 35\%$ , as current major implantable cardioverter-defibrillator (ICD) indication for primary prevention of sudden cardiac death (SCD) in heart failure (HF) patients has been widely recognized to be inefficient. More precisely selecting patients with low LVEF ( $\leq 35\%$ ) is needed to optimize deployment of ICD. Most of the existing prediction models are not appropriate to identify ICD candidates at high risk of SCD in HF patients with low LVEF. Compared to traditional statistical analysis, machine learning (ML) can employ computer algorithms to identify patterns in large datasets, analyze rules automatically and build both linear and non-linear models in order to make data-driven predictions. This study is aimed to develop and validate new models using ML to improve the prediction of SCD in HF patients with low LVEF.

### Methods and analysis

We will conduct a retro-prospective, multicentre, observational registry of Chinese HF patients with low LVEF. The HF patients with LVEF  $\leq 35\%$  after optimized medication at least 3 months will be enrolled in this trial. The primary end points are all-cause death and SCD. The secondary end points are malignant arrhythmia, sudden cardiac arrest, cardiopulmonary resuscitation and rehospitalization due to HF. The baseline demographic, clinical, biological, electrophysiological, social and psychological variables will be collected. ML techniques will be used to develop a SCD prediction model. As compared to traditional multivariable COX regression model derived from the same database, the performance of ML model will be evaluated.

### Ethics and dissemination

The study protocol has been approved by the Ethics Committee of the First Affiliated Hospital of Nanjing Medical University (2017-SR-06). All results will be published in international peer-reviewed journals and presented at relevant conferences.

**Clinical trial registration** ChiCTR-POC-17011842.

## INTRODUCTION

Heart failure (HF), with increased prevalence in Asia as well as western countries, has become a major public health problem. The prevalence of HF in Asia is 1.2%-6.7% depending on the population studied.<sup>[1]</sup> In China, there are 4.2 million HF patients, and 500,000 new cases are being diagnosed each year.<sup>[1]</sup> Although the survival rate after HF diagnosis has been increased due to obvious improvement in medical therapy, the mortality of HF remains high and around 50% of people diagnosed with HF will die within 5 years.<sup>[2]</sup> Sudden cardiac death (SCD), as a result of cardiac arrest, mainly due to lethal arrhythmias like ventricular tachycardia or ventricular fibrillation, is responsible for over 50% of all HF deaths.<sup>[3]</sup>

The most effective strategy for prevention of SCD in patients with HF, is the implantable cardioverter-defibrillator (ICD), associated with 50% relative risk reduction in arrhythmia-related death in secondary prevention,<sup>[4]</sup> and 54% relative risk reduction in primary prevention.<sup>[5]</sup> At present, left ventricular ejection fraction (LVEF)  $\leq 35\%$  is the major ICD indication for primary prevention of SCD.<sup>[6]</sup> However, real-world data show that only 3% to 5% of ICD patients for primary prevention with LVEF  $< 30\%$  to  $35\%$  receive life-saving therapies on an annual basis,<sup>[7]</sup> whereas majority of SCD victims have LVEF  $> 35\%$ .<sup>[8, 9]</sup> Furthermore, obvious decline in rate of SCD for HF patients with reduced LVEF, which was consistent with the cumulative benefit of optimizing medication including angiotensin converting enzyme inhibitor (ACEI) or angiotensin receptor blocker (ARB), beta-blocker, and mineralocorticoid receptor antagonist (MRAs), has been observed.<sup>[10]</sup> Therefore, the utility of this criterion has dwindled. New strategies of identifying high risk HF patients most likely to benefit from primary prevention ICD is urgently needed. Because of higher risk SCD in patients with LVEF  $\leq 35\%$  than with LVEF  $> 35\%$ ,<sup>[11]</sup> identifying patients with low EF at high risk of SCD will be more efficient and economically important.

Over the last decade, lots of multivariate prognostic models derived for chronic HF patients have been proposed (Table 1).<sup>[12-22]</sup> However, these models are not appropriate to identify ICD candidates at high risk of SCD in HF patients with low LVEF. Firstly, chronic heart failure both with reduced LVEF (HFREF) and with

1  
2  
3 preserved LVEF (HFpEF) were represented in all models except I-PRESERVE score,  
4 which included only HFpEF. To the best of our knowledge, there is no specific trial  
5 for the prognosis of low LVEF population, which is extremely important. Additionally,  
6 although all the scores are “not parsimonious”, some critical factors have not been  
7 incorporated into all prognostic models, for example, medications are contained in  
8 only 3 out of 11 scores,<sup>[15, 19, 21]</sup> and optimized medication was not required as  
9 inclusion criteria in all 11 studies. Furthermore, the major limitation of most  
10 prognostic models is inability to predict SCD risk. Electrical risk factors are not  
11 involved in all these models. Although currently some non-invasive factors, including  
12 mechanical dyssynchrony measured by echocardiography, myocardial fibrosis  
13 detected with cardiovascular magnetic resonance, and cardiac autonomic dysfunction  
14 assessed by 123-metaiodobenzylguanidine scintigraphy, have been evaluated to  
15 predict SCD in HF patients,<sup>[23]</sup> it is difficult to widely use them to predict SCD in  
16 large HF population. Resting 12-lead ECG and Holter, as the longest surviving,  
17 broadly available, easily deployed and inexpensive tests, can provide a measure of  
18 cumulative electrical risk, combination of which may significantly improve the SCD  
19 risk prediction beyond EF.<sup>[24]</sup>

20  
21  
22  
23  
24  
25  
26  
27  
28  
29  
30  
31  
32  
33  
34  
35  
36  
37  
38  
39  
40  
41  
42  
43  
44  
45  
46  
47  
48  
49  
50  
51  
52  
53  
54  
55  
56  
57  
58  
59  
60

Table 1. Risk model for HF in the literature

| Author   | Database    | Year | Variables (n) | Patients (n) | End points                                                               |
|----------|-------------|------|---------------|--------------|--------------------------------------------------------------------------|
| Agostoni | MECKI       | 2012 | 6             | 2716         | Cardiovascular death; urgent cardiac transplant                          |
| Barlera  | GISSI-HF    | 2013 | 14            | 6975         | all-cause mortality                                                      |
| Collier  | EMPHASIS-HF | 2013 | 10            | 2737         | all-cause mortality                                                      |
| Komajda  | I-PRESERVE  | 2011 | 12            | 4128         | all-cause mortality                                                      |
| Levy     | SHFM        | 2006 | 14            | 1125         | Survival                                                                 |
| O'Connor | HF-ACTION   | 2012 | 4             | 2331         | all-cause mortality                                                      |
| Pocock   | CHARM       | 2006 | 21            | 7599         | all-cause mortality                                                      |
| Pocock   | MAGGIC      | 2012 | 13            | 39372        | all-cause mortality                                                      |
| Senni    | CVM-HF      | 2006 | 13            | 292          | all-cause mortality                                                      |
| Senni    | 3C-HF       | 2013 | 11            | 2016         | all-cause mortality; urgent heart transplant (1 year)                    |
| Vazquez  | MUSIC       | 2009 | 10            | 992          | all-cause mortality; cardiac mortality; pump failure death, sudden death |

Based on above reasons, the novel risk assessment tools should meet the following

1  
2  
3 requirements: (1) the risk model should be developed from special low LVEF  
4 population ( $\leq 35\%$ ) to accelerate its clinical application and promote the innovation of  
5 ICD indications for primary prevention. (2) The narrow focus on the LVEF as main  
6 predictor of SCD risk should be broadened, and more cardiac and non-cardiac factors  
7 should be included. (3) Electrical risk factors, which are broadly available, easily  
8 deployed and inexpensive, should be considered as candidate predictors to evaluate  
9 the risk of sudden arrhythmic death. (4) Although sometimes it is not easy to  
10 determine the cause of death, SCD as the primary end point should be defined  
11 whenever possible.  
12  
13  
14  
15  
16  
17  
18

19  
20 Data processing is the next key step to develop prognostic models. This study  
21 involves non-linear prediction models, a large number of patients and numerous  
22 predictors among which there may be complicated correlations. Traditional  
23 hypothesis-driven statistical analysis is difficult to overcome these challenges. The  
24 machine learning (ML) approaches have great potential to improve the solution. They  
25 employ computer algorithms to identify patterns in large datasets with a large number  
26 of variables, analyze rules automatically and build both linear and non-linear models  
27 in order to make data-driven predictions or decisions. Weng et al. [25] found that ML  
28 significantly improved accuracy of cardiovascular risk prediction, increased the  
29 number of patients who could benefit from preventive treatment and avoided  
30 unnecessary treatment. However, ML has not been reported to be applied to SCD risk  
31 prediction based on large HF population. Therefore, application of ML for prediction  
32 of SCD in HF patients with low LVEF will be innovative and clinically significant.  
33  
34  
35  
36  
37  
38  
39  
40  
41  
42  
43  
44

## 45 AIMS

46  
47 The purpose of our study is to develop and validate new models to improve the  
48 prediction of SCD in HF patients with low LVEF. The new strategies of identifying  
49 HF patients most likely to benefit from primary prevention ICD, will impulse the  
50 revolution of ICD indications. The specific research objectives are:  
51  
52  
53

- 54 1. To develop prediction models to evaluate prognosis and SCD risk respectively  
55 by ML methods and traditional COX regression in HF patients with low LVEF  
56  
57  
58



(≤35%).

2. To validate these prediction models in a prospective cohort and evaluate the performance of ML models, as compared to multivariable COX regression model derived from the same database.

## METHODS AND ANALYSIS

### Study design

This study is a retro-prospective, multicentre, non-interventional, observational clinical registry trial. The primary sponsor is The First Affiliated Hospital of Nanjing Medical University. This trial has been registered in the Chinese Clinical Trial Registry (ChiCTR-POC-17011842). The trial will be conducted across 14 cardiovascular departments in Tertiary A hospitals throughout the People's Republic of China:

The First Affiliated Hospital of Nanjing Medical University, Nanjing

Xiamen Cardiovascular Hospital, Xiamen University, Xiamen

Wuhan Asia Heart Hospital, Wuhan

Jiangning Hospital Affiliated to Nanjing Medical University, Nanjing

The Second People's Hospital of Lianyungang, Lianyungang

The Affiliated Hospital of Jiangsu University, Zhenjiang

Taixing People's Hospital, Taixing

The First People's Hospital of Huaian, Huaian

The First People's Hospital of Yancheng, Yancheng

Rugao People's Hospital, Rugao

The First People's Hospital of Zhangjiagang, Zhangjiagang

The Third People's Hospital of Suzhou, Suzhou

The Third People's Hospital of Wuxi, Wuxi

The Second Affiliated Hospital of Nanjing Medical University, Nanjing,

The data of the First Affiliated Hospital of Nanjing Medical University and Xiamen Cardiovascular Hospital Xiamen University will be retrospectively collected from

1  
2  
3 January 2016 to December 2017. About 500 retrospective cases meet the inclusion  
4 criteria according to preliminary estimation. The prospective recruitment has started  
5 in the above 14 hospitals since January 2018. The retrospective cases and the first  
6 1000 prospective cases will be used to develop the prediction models. And the next  
7 1000 prospective cases will be used for model validation. The flow diagram of the  
8 progress is illustrated in Figure 1.  
9  
10  
11  
12  
13

14 Figure 1 Flow diagram of progress  
15  
16  
17

### 18 **Inclusion criteria**

19 To participate in this trial, patients must comply with all of the following  
20

- 21 1. Diagnosis of HF<sub>r</sub>EF according to the 2016 ESC HF Guideline<sup>[6]</sup>
- 22 2. LVEF  $\leq$  35% (measured by Simpson's methods) after optimized medication  
23 including ACEI or ARB, beta-blocker and MRA if available and not contraindicated  
24 at least 3 months.
- 25 3. Signed informed consent.  
26  
27  
28  
29  
30  
31

### 32 **Exclusion criteria**

- 33 1. Hypertrophic cardiomyopathy
- 34 2. Rheumatic heart disease
- 35 3. Congenital heart disease
- 36 4. Pulmonary heart disease
- 37 5. Pericardial diseases and myocarditis
- 38 6. Acute myocardial infarction in recent 3 months, including STEMI and NSTEMI
- 39 7. Aortic dissection
- 40 8. Severe hematologic disease including leukemia, lymphoma, aplastic anemia, etc.
- 41 9. Autoimmune disease
- 42 10. Malignant tumor
- 43 11. Hormone replacement
- 44 12. Application of other interventional clinical trial
- 45 13. Non-drug therapies for improving heart function: CRT-P/D, ICD, heart  
46  
47  
48  
49  
50  
51  
52  
53  
54  
55  
56  
57  
58  
59  
60

1  
2  
3 transplantation, surgical resection of ventricular aneurysm, interventional left  
4 ventricular restoration with Revivent<sup>(TM)</sup> / Parachute<sup>(TM)</sup> system), MitraClip therapy  
5 for recurrent mitral regurgitation  
6  
7  
8  
9  
10

## 11 **Endpoints**

### 12 ***Primary end point***

13 All-cause death and SCD, including cardiac death and death from other causes

### 14 ***Secondary end point***

15 Lethal arrhythmia, sudden cardiac arrest, cardiopulmonary resuscitation,  
16 rehospitalization due to HF  
17  
18  
19  
20  
21  
22  
23

## 24 **Recruitment and consent**

25 Participants will be identified and recruited at each of the participating centers. The  
26 clinical status of potential participants will be assessed, and their medical records will  
27 also be reviewed to confirm the eligibility according to inclusion and exclusion  
28 criteria.  
29  
30  
31  
32

33 The study details will be explained to all potentially eligible and interested subjects.  
34 The patients who agree to attend this study will sign the informed consent form (ICF)  
35 indicating that they fully understand the study and their rights of confidentiality and  
36 withdrawal from the study without giving a reason.  
37  
38  
39  
40  
41  
42

## 43 **Baseline evaluation**

44 Prognostic models of HF in the last 10 years have been reviewed and the involved  
45 risk factors have been ranked according to their corresponding hazard ratio in  
46 respective risk model (Table 1, Figure 2). Age, sex, New York Heart Association  
47 (NYHA) class, LVEF, prior HF hospitalization, course of HF, severe valvular heart  
48 disease, atrial fibrillation, prior myocardial infarction / coronary artery bypass grafting  
49 (CABG), renal dysfunction, chronic obstructive pulmonary disease (COPD), diabetes  
50 mellitus, ischemic etiology, decreased systolic pressure, low body mass index (BMI),  
51  
52  
53  
54  
55  
56  
57  
58  
59  
60

1  
2  
3 anemia, hyponatremia, high N-terminal pro brain natriuretic peptide (NT-proBNP),  
4 uricemia, current smoker were included. Variables which were not listed in previous  
5 models but appear relevant to higher risk of SCD in HF patients, and would therefore  
6 merit consideration, include syncope or pre-syncope, frequent premature ventricular  
7 beat, non-sustained ventricular tachycardia, complete left bundle branch block  
8 (CLBBB), long QT interval, increased QT dispersion. In addition, self-care ability,  
9 social support and psychological state including depression and anxiety, are also  
10 predictors for subsequent poor prognosis in HF patients. The above risk factors have  
11 been assessed and confirmed by an expert panel of cardiologists and statistician, and  
12 will be collected in this study particularly.

13  
14  
15  
16  
17  
18  
19  
20  
21 Figure 2 Hazard ratio of variables in different risk models

22  
23 The baseline data of all eligible subjects will be collected as following.

- 24 ● Demographic characteristics: date of birth, gender, height and weight
- 25 ● Life style behavior: smoking and drinking status
- 26 ● Vital signs: blood pressure and heart rate
- 27 ● NYHA class
- 28 ● Etiology of heart failure: The ischemic etiology will be confirmed if any following  
29 point is met: a. prior myocardial infarction or revascularization history (coronary  
30 artery bypass grafting, CABG / percutaneous coronary intervention, PCI); b. left  
31 main or proximal segment of left anterior descending artery stenosis  $\geq 75\%$   
32 showed by coronary angiogram (CAG); c. at least two main coronary artery  
33 branches stenosis  $\geq 75\%$  showed by CAG. Otherwise non-ischemic HF should be  
34 identified.
- 35 ● Prior HF hospitalization history: first HF hospitalization or not, times of prior HF  
36 hospitalization, course of HF (since the HF symptoms appear, if unavailable, since  
37 the decreased EF was found).
- 38 ● Coronary heart disease history: myocardial infarction or angina history, CAG  
39 result, revascularization history, recent angina.
- 40 ● Arrhythmia history: atrial fibrillation, atrial flutter, premature atrial contraction  
41 (PAC), premature ventricular contraction (PVC), non-sustained VT (NSVT),  
42  
43  
44  
45  
46  
47  
48  
49  
50  
51  
52  
53  
54  
55  
56  
57  
58  
59  
60

sustained VT (SVT), ventricular fibrillation, and some bradyarrhythmias.

- Syncope or pre-syncope history
- Cardiac arrest/ cardiopulmonary resuscitation history
- Other history: hypertension, diabetes mellitus, COPD, etc.
- Echocardiography: LV end-diastolic volume (LVEDV), LV end-systolic volume (LVESV) and LVEF measured by Simpson's method; Left atrial diameter, LV end-diastolic diameter (LVEDD) and LV end-systolic diameter (LVESD), pulmonary artery systolic pressure. The status of valve regurgitation will be evaluated (0-none; 1-mild; 2-mild to moderate; 3-moderate; 4- severe)
- ECG: Left / right bundle branch block will be recorded. QRS duration and QT interval will be tested and QT dispersion will be calculated.
- Holter: total heart beat of the whole day, minimum/ maximum/ average HR, onset of PVC, PAC, NSVT, VT, atrial fibrillation/ flutter.
- Laboratory tests results: serum creatinine, blood urea nitrogen (BUN), serum sodium, hemoglobin, Thyroid Stimulating Hormone (TSH), free triiodothyronine (FT3), free thyroxine (FT4), NT-proBNP.
- medication: ACEI/ARB, beta-blocker, aldosterone antagonist, diuretic, digoxin, antiplatelet agent, anticoagulant, statin, calcium channel blocker, antiarrhythmics, Ivabradine and angiotensin receptor blocker-neprilysin inhibitor (ARNI).
- Evaluation of self-care behavior and social support: 9-item European Heart Failure Self-care Behavior Scale (9-EHFScBS) <sup>[26]</sup> will be used to determine the self-care levels in HF patients. Social Support Rating Scale (SSRS)<sup>[27]</sup> will be used to evaluate the social support condition in HF patients.
- Assessment of psychological status: Hamilton Depression Scale (HAMD) and Hamilton Anxiety Scale (HAMA).

### **Patient visits**

After enrolled in this research, all the subjects, will be followed-up periodically in outpatient department or by telephone interview every 3 months. As primary end point, all-cause death and SCD will be focused. Cause of death will be analyzed in

1  
2  
3 detail. SCD is defined by the World Health Organization as unexpected death that  
4 occurs within 1 hour from the onset of new or worsening symptoms (witnessed arrest)  
5 or, if unwitnessed, within 24h from when the individual was last observed alive and  
6 asymptomatic<sup>[28]</sup>. The lethal arrhythmia including VT/VF, sudden cardiac arrest,  
7 cardiopulmonary resuscitation, and rehospitalization due to HF will be recorded  
8 carefully.  
9

10  
11  
12  
13  
14 During follow-up, lethal arrhythmia will be recognized more precisely for patients  
15 who receive ICD or CRT/D implantation, and will be recorded as adverse event. The  
16 patients, who receive CRT-P/D, heart transplantation, surgical resection of ventricular  
17 aneurysm, interventional left ventricular restoration with Revivent<sup>(TM)</sup> / Parachute<sup>(TM)</sup>  
18 system), MitraClip therapy for recurrent mitral regurgitation, or some other non-drug  
19 therapy to improve heart function, will be followed up as usual.  
20  
21  
22  
23  
24

#### 25 **Data collection**

26  
27 In prospective part, clinical data of subjects will be collected and filled in the  
28 electrical data capture (EDC) system at baseline and particular follow-up visit. In  
29 retrospective part, the same baseline information, except for 9-EHFScBS, SSRS,  
30 HAMD, HAMA questionnaires, will also be captured and input into the EDC system.  
31 The following prospective visits (every three months) will conducted regularly and  
32 will be recorded in the EDC system. Investigator will record all the information of  
33 adverse event (AE), study bias, withdraw from the study or death in EDC system. In  
34 this study, the participants will be identified by study codes, and their names will not  
35 appear in EDC system. All the personal information including contact information,  
36 medical record and outcome, will not be revealed to any person who has not been  
37 authorized by principle investigator. Professional staffs are responsible for database  
38 management, data maintenance and regular data backup. Data quality will be  
39 monitored regularly. The data collection checklist is showed in Table 2.  
40  
41  
42  
43  
44  
45  
46  
47  
48  
49

50 Table 2 The checklist for data collection

| Data collection             | Baseline            |                   | regular visit | withdraw /death |
|-----------------------------|---------------------|-------------------|---------------|-----------------|
|                             | Retrospective cases | Prospective cases |               |                 |
| Informed consent            | √                   | √                 |               |                 |
| Quantification verification | √                   | √                 |               |                 |

|                                                     |               |   |   |   |
|-----------------------------------------------------|---------------|---|---|---|
| (inclusion and exclusion)                           |               |   |   |   |
| Baseline evaluation                                 | ✓             | ✓ |   |   |
| Medication                                          | ✓             | ✓ |   |   |
| Questionnaires<br>9-EHFScBS<br>SSRS<br>HAMD<br>HAMA |               | ✓ |   |   |
| Regular follow-up visit<br>(every 3 months)         |               |   | ✓ |   |
| Survival state                                      | ✓             |   | ✓ | ✓ |
| Adverse event                                       | Once happen ✓ |   |   |   |
| Study bias                                          | Once happen ✓ |   |   |   |
| Withdraw from the study                             | Once happen ✓ |   |   |   |
| Death                                               | Once happen ✓ |   |   |   |

## Statistical analysis

### *Data classification and pre-processing*

All above collected variables, which might be predictor of all adverse prognosis of HF described in end point events, will be classified as uncontrollable variables (e.g. age, gender, history), controllable variables associated with heart (e.g. NYHA class, LVEF, increased heart rate) and controllable variables beyond heart (e.g. smoking, anemia, diabetes mellitus). Appropriate dummy variables will be used for binary variables and categorical variables, and quantitative variables will be fitted as a single continuous measurement (e.g. age, heart rate, NT-proBNP), unless there is clear evidence of nonlinearity. In order to create possible simple risk score, some continuous variables will also be categorized into several groups according to both usual clinical cutpoints and expert advice.

### *Machine learning*

Variable selection is the process of selecting a subset of relevant variables for use in model construction, which can substantially reduce the abundant information and decrease the number of variables that are input to the prediction model. In this study, the technique named as “information gain ranking” will be used to select appropriate variables. Information gain represents the effectiveness of a variable based on entropy,

1  
2  
3 which characterizes the unpredictability of a system. The information gain of a  
4 variable is evaluated as the entropy difference of the system when including and  
5 excluding this variable. Then the variables whose information gain scores are less  
6 than a threshold are considered to be insignificant and will be excluded in the  
7 prediction.  
8  
9  
10  
11

12 Predictive classifiers for SCD prediction in HF patients will be developed by the  
13 following classification algorithms respectively: decision tree, logistic regression,  
14 support vector machine, artificial neural network. [29] The performance and general  
15 error estimation of these ML models will be assessed by 10-fold cross-validation. The  
16 dataset will be randomly divided into 10 equal folds. 9 folds will be used as training  
17 set with the remaining one fold as validation set. The validation results from 10  
18 repeats will be combined to provide a measure of the overall performance. The  
19 prediction models derived from the four classification algorithms above will be  
20 evaluated based on the accuracy and interpretability. Finally, clinical experts and  
21 computer specialists will discuss and choose the best model to predict the prognosis  
22 and SCD in HF patients and then perform the further validation with the prospective  
23 dataset.  
24  
25  
26  
27  
28  
29  
30  
31  
32  
33

### 34 ***COX proportional-hazards regression***

35  
36 Univariable COX proportional-hazards modeling will be used to identify strong  
37 independent baseline candidate predictors for the primary outcome and secondary  
38 outcome. We will use both forward and backward stepwise procedure to derive the  
39 multivariable COX proportional-hazards model with  $p < 0.05$  as the inclusion criterion.  
40 Every variable in the model will be multiplied by its  $\beta$ -coefficient and the products  
41 will be summed to calculate the risk score. Risk function will be used to estimate the  
42 level of risk. The calculating formula is as follows.  
43  
44  
45  
46  
47  
48

$$49 \quad P = h(t_j; X_k) = h_0(t_j) \exp(SCORE)$$

$$50 \quad SCORE = X_k \beta_k = \beta_0 + \beta_1 x_1 + \beta_2 x_2 + \dots + \beta_p x_p$$

### 51 ***External validation***

52  
53  
54 The dynamic prospective cases will be used for external validation of the optimal ML  
55 and COX models. The validation will be performed using the models to calculate the  
56  
57  
58  
59  
60



1  
2  
3 probability of the outcome of interest occurring for each individual included in the  
4 validation sample, when compared with the events actually observed to occur in this  
5 sample. The discrimination of each model will be estimated by receiver-operating  
6 characteristic (ROC) curve. The calibration of the models will be assessed by  
7 Hosmer-Lemeshow goodness-of-fit test. The ML prediction model will be compared  
8 with the COX regression model .  
9  
10  
11  
12  
13  
14  
15

### 16 **Patient and public involvement statement**

17 During the design of this study, a survey of patient requirements, including  
18 communication needs, follow-up frequency, visit cost etc., was conducted in  
19 population of potential HF participants, which provided important evidence for  
20 drawing up this study protocol to meet most of the patients' needs, build close contact  
21 with patients, enhance the overall adherence and improve the accuracy of endpoint  
22 event. This study is not the patient-led research, patients are not involved in the  
23 recruitment to and conduct of the study. The participants will be informed of the study  
24 results by phone at the end of this study. The alive patients will be evaluated with the  
25 new prediction model, and the ICD intervention will be recommended to the high  
26 SCD risk patients.  
27  
28  
29  
30  
31  
32  
33  
34  
35  
36  
37

### 38 **Study time frame**

39 The retrospective data collection in the two sub-centers started in March 2017, and  
40 prospective enrollment in all 14 sub-centers has started in January 2018. The  
41 follow-up period is scheduled to end in December 2019. The major part of data  
42 analysis will be performed from January to March 2020. The study framework and  
43 process is summarized in Figure 3.  
44  
45  
46  
47  
48

49 Figure 3 Study framework and process  
50  
51

### 52 **ETHICS AND DISSEMINATION**

53 The study protocol has been approved by the Ethics Committee of The First Affiliated  
54 Hospital of Nanjing Medical University (2017-SR-06). All necessary information  
55  
56  
57  
58  
59  
60

1  
2  
3 about this study will be disclosed to the patients. Every subject will be asked to sign  
4 the ICF, indicating that they fully understand the study and voluntarily participate in  
5 this study. All results of this study will be published in international peer-reviewed  
6 journals and presented at relevant conferences.  
7  
8  
9

## 10 11 12 **STRENGTHS AND LIMITATIONS**

13  
14 This is the first retro-prospective, multicentre registry study in China, aimed to  
15 investigate the feasibility and accuracy of applying ML to predict SCD in HF patients  
16 with low LVEF. Except for SCD, a broad range of outcomes, including all-cause death,  
17 lethal arrhythmia, sudden cardiac arrest, cardiopulmonary resuscitation and  
18 rehospitalization due to HF, will be evaluated in this study, and the corresponding  
19 prediction models will also be developed, if available. The traditional multivariable  
20 COX regression model will be derived from the same database and will be compared  
21 to machine learning. This project has great promise to improve ICD patient selection.  
22  
23  
24  
25  
26  
27  
28

29 The limitations of this study are as follows: 1. The SCD prediction of HF patients  
30 with LVEF>35% will not be evaluated based on the design of this study. 2.  
31 Sometimes, It might be difficult to determine the end point of this study for some  
32 patients, when dealing with SCD, lethal arrhythmia and sudden cardiac arrest,  
33 especially outside the hospital.  
34  
35  
36  
37  
38  
39

## 40 **CONCLUSION**

41 This study is aimed to investigate the feasibility and accuracy of machine learning to  
42 predict SCD in HF patients with low LVEF. By the completion of this study, it is  
43 expected to derive and validate the new prediction models. Our study has promise to  
44 improve selection of ICD candidates for primary prevention in HF patients.  
45  
46  
47  
48  
49  
50

## 51 **FOOTNOTES**

52  
53 **Acknowledgements** The authors thank Weihua Zhou, PhD of the University of  
54 Southern Mississippi for providing machine learning techniques; Rongbin Yu,  
55  
56  
57  
58  
59

1  
2  
3 Shaowen Tang and Yongyue Wei, PhD of Nanjing Medical University for providing  
4 advice regarding study design and statistical analysis; Xiamen Cardiovascular  
5 Hospital, Xiamen University (Xiamen, China), Wuhan Asia Heart Hospital (Wuhan,  
6 China), Jiangning Hospital Affiliated to Nanjing Medical University, (Nanjing, China),  
7 The Second People's Hospital of Lianyungang (Lianyungang, China), The Affiliated  
8 Hospital of Jiangsu University (Zhenjiang, China), Taixing People's Hospital (Taixing,  
9 China), The First People's Hospital of Huaian (Huaian, China), The First People's  
10 Hospital of Yancheng (Yancheng, China), Rugao People's Hospital (Rugao, China),  
11 The First People's Hospital of Zhangjiagang (Zhangjiagang, China), The Third  
12 People's Hospital of Suzhou (Suzhou, China), The Third People's Hospital of Wuxi  
13 (Wuxi, China), The Second Affiliated Hospital of Nanjing Medical University  
14 (Nanjing, China) for collaboration including recruitment and follow-up of HF patients.  
15 The authors also thank the HF patients who participated in the survey of patient  
16 requirements during the design of this study.

17  
18  
19  
20  
21  
22  
23  
24  
25  
26  
27  
28  
29 **Contributors** JGZ and FQM conceived and designed the study. ZHZ, XFH, ZYQ,  
30 YW, YHC, YLW, YZ, ZC, XWZ, JY, JLZ, JHG, KBL, LC, RJZ, HJ participated in  
31 different phases of the protocol design. WHZ provide expertise on data processing  
32 and machine learning. SWT and YYW provided their expertise for traditional  
33 statistical analysis. JGZ obtained funding. FQM drafted the final manuscript. All  
34 authors have read the manuscript and provided feedback. JGZ approved the final  
35 version of the manuscript prior to submission. FQM took responsibility for the  
36 submission process.

37  
38  
39  
40  
41  
42  
43  
44 **Funding** This study was supported mainly by Jiangsu Province's Key Medical Center  
45 (grant number: YXZXA2016010; PI: Jiangang Zou, MD, PhD); in part by National  
46 Natural Science Foundation of China (grant number: 81470457; PI: Jiangang Zou,  
47 MD, PhD) and Jiangsu Science and Technology Department (grant number:  
48 BE2016764; PI: Jiangang Zou, MD, PhD). This research was also supported in part  
49 by an AHA grant (grant number: 17AIREA33700016; PI: Weihua Zhou, PhD) and a  
50 New Faculty startup grant from the University of Southern Mississippi (grant number:  
51 DE01791; PI: Weihua Zhou, PhD).

**Competing interests** We have read and understood BMJ policy on declaration of interests and declare that we have no competing interests.

**Ethics approval** This study has been approved by the Ethics Committee of The First Affiliated Hospital of Nanjing Medical University (2017-SR-06).

**Provenance and peer review** Not commissioned; externally peer reviewed.

**Data sharing statement** No additional data are available.

## REFERENCE

- [1] Sato N. Epidemiology of Heart Failure in Asia[J]. *Heart Fail Clin*, 2015,11(4):573-579.
- [2] Mozaffarian D, Benjamin E J, Go A S, et al. Heart disease and stroke statistics--2015 update: a report from the American Heart Association[J]. *Circulation*, 2015,131(4):e29-e322.
- [3] Tomaselli G F, Zipes D P. What causes sudden death in heart failure?[J]. *Circ Res*, 2004,95(8):754-763.
- [4] Connolly S J, Hallstrom A P, Cappato R, et al. Meta-analysis of the implantable cardioverter defibrillator secondary prevention trials. AVID, CASH and CIDS studies. Antiarrhythmics vs Implantable Defibrillator study. Cardiac Arrest Study Hamburg. Canadian Implantable Defibrillator Study[J]. *Eur Heart J*, 2000,21(24):2071-2078.
- [5] Yousuf O, Chrispin J, Tomaselli G F, et al. Clinical management and prevention of sudden cardiac death[J]. *Circ Res*, 2015,116(12):2020-2040.
- [6] Ponikowski P, Voors A A, Anker S D, et al. 2016 ESC Guidelines for the diagnosis and treatment of acute and chronic heart failure: The Task Force for the diagnosis and treatment of acute and chronic heart failure of the European Society of Cardiology (ESC) Developed with the special contribution of the Heart Failure Association (HFA) of the ESC[J]. *Eur Heart J*, 2016,37(27):2129-2200.
- [7] Kober L, Thune J J, Nielsen J C, et al. Defibrillator Implantation in Patients with Nonischemic Systolic Heart Failure[J]. *N Engl J Med*, 2016,375(13):1221-1230.
- [8] Myerburg R J, Spooner P M. Opportunities for sudden death prevention: directions for new clinical and basic research[J]. *Cardiovasc Res*, 2001,50(2):177-185.
- [9] Stecker E C, Vickers C, Waltz J, et al. Population-based analysis of sudden cardiac death with and without left ventricular systolic dysfunction: two-year findings from the Oregon Sudden Unexpected Death Study[J]. *J Am Coll Cardiol*, 2006,47(6):1161-1166.
- [10] Shen L, Jhund P S, Petrie M C, et al. Declining Risk of Sudden Death in Heart Failure[J]. *N Engl J Med*, 2017,377(1):41-51.
- [11] Myerburg R J, Spooner P M. Opportunities for sudden death prevention: directions for new clinical and basic research[J]. *Cardiovasc Res*, 2001,50(2):177-185.
- [12] Agostoni P, Corra U, Cattadori G, et al. Metabolic exercise test data combined with cardiac and kidney indexes, the MECKI score: a multiparametric approach to heart failure prognosis[J]. *Int J*

- Cardiol, 2013,167(6):2710-2718.
- [13] Barlera S, Tavazzi L, Franzosi M G, et al. Predictors of mortality in 6975 patients with chronic heart failure in the Gruppo Italiano per lo Studio della Streptochinasi nell'Infarto Miocardico-Heart Failure trial: proposal for a nomogram[J]. *Circ Heart Fail*, 2013,6(1):31-39.
- [14] Collier T J, Pocock S J, McMurray J J, et al. The impact of eplerenone at different levels of risk in patients with systolic heart failure and mild symptoms: insight from a novel risk score for prognosis derived from the EMPHASIS-HF trial[J]. *Eur Heart J*, 2013,34(36):2823-2829.
- [15] Komajda M, Carson P E, Hetzel S, et al. Factors associated with outcome in heart failure with preserved ejection fraction: findings from the Irbesartan in Heart Failure with Preserved Ejection Fraction Study (I-PRESERVE)[J]. *Circ Heart Fail*, 2011,4(1):27-35.
- [16] Levy W C, Mozaffarian D, Linker D T, et al. The Seattle Heart Failure Model: prediction of survival in heart failure[J]. *Circulation*, 2006,113(11):1424-1433.
- [17] O'Connor C M, Whellan D J, Wojdyla D, et al. Factors related to morbidity and mortality in patients with chronic heart failure with systolic dysfunction: the HF-ACTION predictive risk score model[J]. *Circ Heart Fail*, 2012,5(1):63-71.
- [18] Pocock S J, Wang D, Pfeffer M A, et al. Predictors of mortality and morbidity in patients with chronic heart failure[J]. *Eur Heart J*, 2006,27(1):65-75.
- [19] Pocock S J, Ariti C A, McMurray J J, et al. Predicting survival in heart failure: a risk score based on 39 372 patients from 30 studies[J]. *Eur Heart J*, 2013,34(19):1404-1413.
- [20] Senni M, Santilli G, Parrella P, et al. A novel prognostic index to determine the impact of cardiac conditions and co-morbidities on one-year outcome in patients with heart failure[J]. *Am J Cardiol*, 2006,98(8):1076-1082.
- [21] Senni M, Parrella P, De Maria R, et al. Predicting heart failure outcome from cardiac and comorbid conditions: the 3C-HF score[J]. *Int J Cardiol*, 2013,163(2):206-211.
- [22] Vazquez R, Bayes-Genis A, Cygankiewicz I, et al. The MUSIC Risk score: a simple method for predicting mortality in ambulatory patients with chronic heart failure[J]. *Eur Heart J*, 2009,30(9):1088-1096.
- [23] Halliday B P, Cleland J, Goldberger J J, et al. Personalizing Risk Stratification for Sudden Death in Dilated Cardiomyopathy: The Past, Present, and Future[J]. *Circulation*, 2017,136(2):215-231.
- [24] Aro A L, Reinier K, Rusinaru C, et al. Electrical risk score beyond the left ventricular ejection fraction: prediction of sudden cardiac death in the Oregon Sudden Unexpected Death Study and the Atherosclerosis Risk in Communities Study[J]. *Eur Heart J*, 2017,38(40):3017-3025.
- [25] Weng S F, Reips J, Kai J, et al. Can machine-learning improve cardiovascular risk prediction using routine clinical data?[J]. *PLoS One*, 2017,12(4):e174944.
- [26] Jaarsma T, Arestedt K F, Martensson J, et al. The European Heart Failure Self-care Behaviour scale revised into a nine-item scale (EHFScB-9): a reliable and valid international instrument[J]. *Eur J Heart Fail*, 2009,11(1):99-105.
- [27] Hu X, Hu X, Su Y, et al. The changes and factors associated with post-discharge self-care behaviors among Chinese patients with heart failure[J]. *Patient Prefer Adherence*, 2015,9:1593-1601.
- [28] Yousuf O, Chrispin J, Tomaselli G F, et al. Clinical management and prevention of sudden cardiac death[J]. *Circ Res*, 2015,116(12):2020-2040.
- [29] James G, Witten D, Hastie T, Tibshirani R. An introduction to statistical learning: with applications in R. Springer, New York; 2013.

1  
2  
3  
4  
5  
6  
7  
8  
9  
10  
11  
12  
13  
14  
15  
16  
17  
18  
19  
20  
21  
22  
23  
24  
25  
26  
27  
28  
29  
30  
31  
32  
33  
34  
35  
36  
37  
38  
39  
40  
41  
42  
43  
44  
45  
46  
47  
48  
49  
50  
51  
52  
53  
54  
55  
56  
57  
58  
59  
60

For peer review only

1  
2  
3  
4  
5  
6  
7  
8  
9  
10  
11  
12  
13  
14  
15  
16  
17  
18  
19  
20  
21  
22  
23  
24  
25  
26  
27  
28  
29  
30  
31  
32  
33  
34  
35  
36  
37  
38  
39  
40  
41  
42  
43  
44  
45  
46  
47  
48  
49  
50  
51  
52  
53  
54  
55  
56  
57  
58  
59  
60

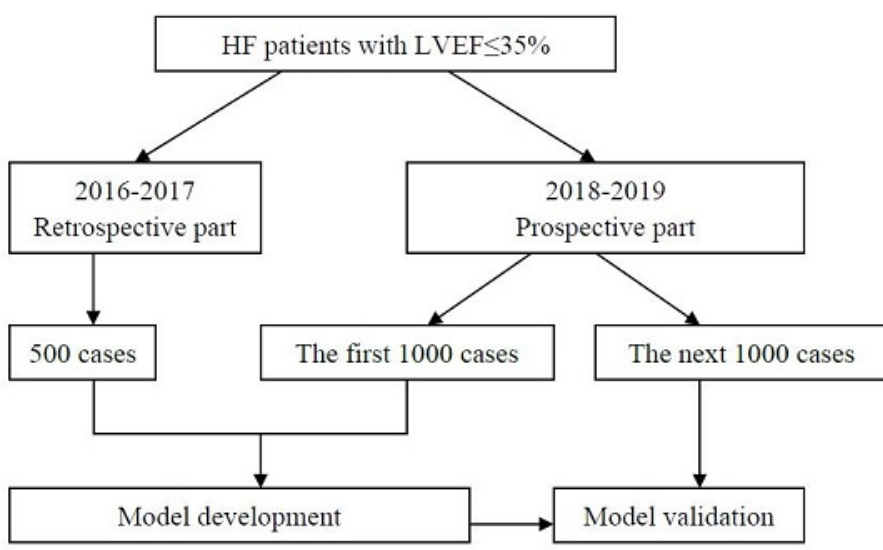

Figure 1 Flow diagram of progress

158x97mm (96 x 96 DPI)

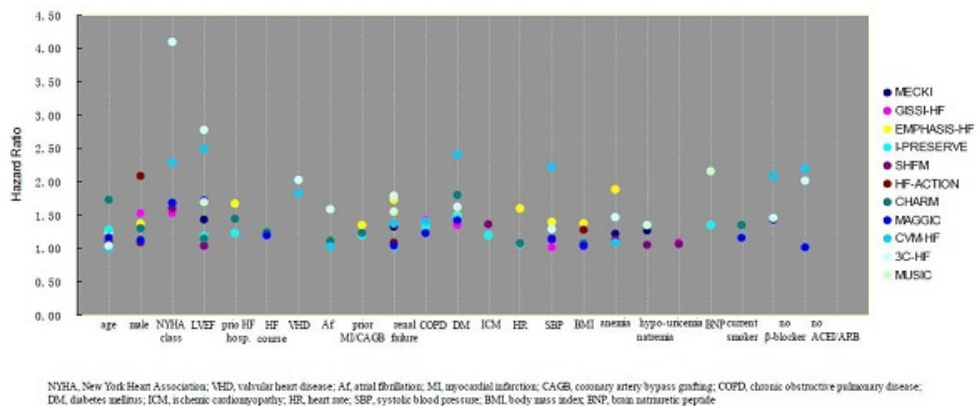

NYHA, New York Heart Association; VHD, valvular heart disease; Af, atrial fibrillation; MI, myocardial infarction; CABG, coronary artery bypass grafting; COPD, chronic obstructive pulmonary disease; DM, diabetes mellitus; ICM, ischemic cardiomyopathy; HR, heart rate; SBP, systolic blood pressure; BMI, body mass index; BNP, brain natriuretic peptide

Figure 2 Hazard ratio of variables in different risk models

158x78mm (96 x 96 DPI)



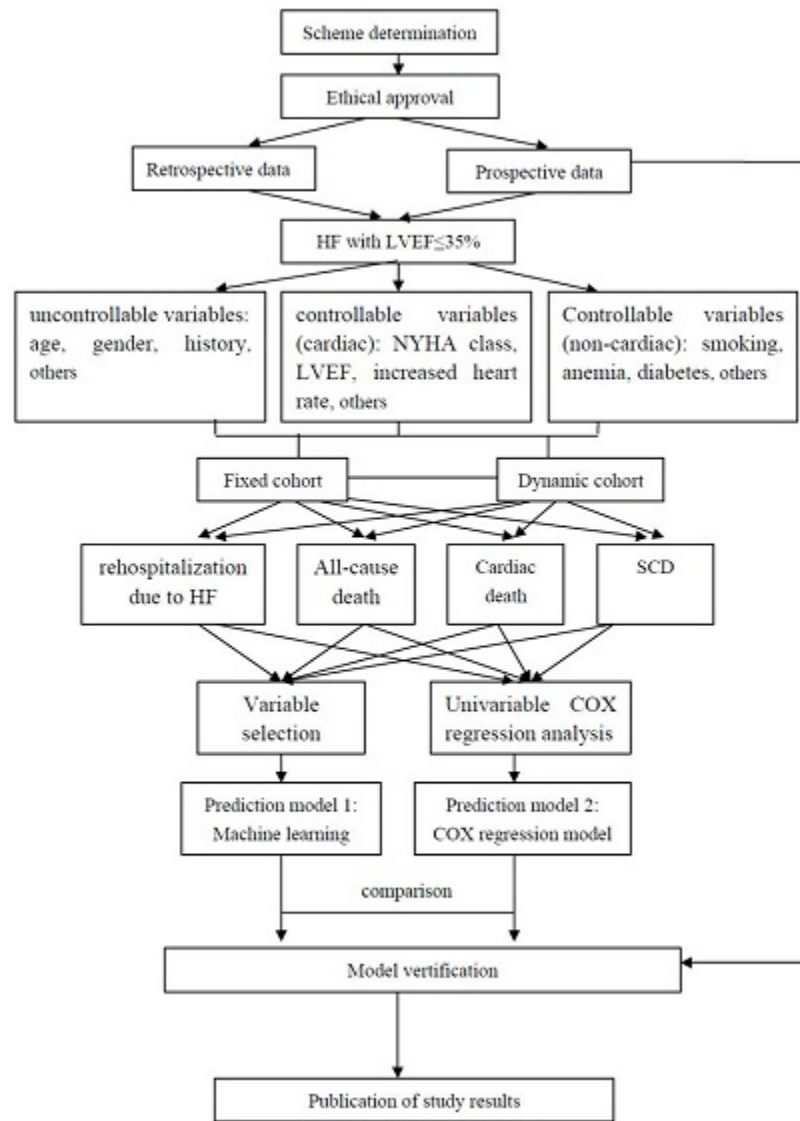

Figure 3 Study framework and process

76x101mm (150 x 150 DPI)

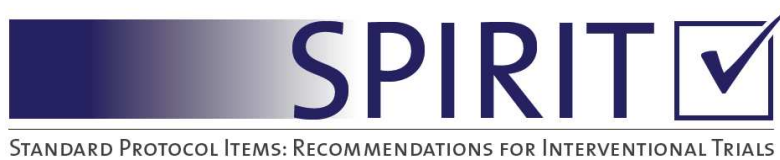

SPIRIT 2013 Checklist: Recommended items to address in a clinical trial protocol and related documents\*

| Section/item                      | Item No | Description                                                                                                                                                                                                                                                                                               |
|-----------------------------------|---------|-----------------------------------------------------------------------------------------------------------------------------------------------------------------------------------------------------------------------------------------------------------------------------------------------------------|
| <b>Administrative information</b> |         |                                                                                                                                                                                                                                                                                                           |
| Title                             | 1       | Descriptive title identifying the study design, population, interventions, and, if applicable, trial acronym <b>(P1)</b>                                                                                                                                                                                  |
| Trial registration                | 2a      | Trial identifier and registry name. If not yet registered, name of intended registry <b>(P6)</b>                                                                                                                                                                                                          |
|                                   | 2b      | All items from the World Health Organization Trial Registration Data Set <b>(P6)</b>                                                                                                                                                                                                                      |
| Protocol version                  | 3       | Date and version identifier                                                                                                                                                                                                                                                                               |
| Funding                           | 4       | Sources and types of financial, material, and other support <b>(P16)</b>                                                                                                                                                                                                                                  |
| Roles and responsibilities        | 5a      | Names, affiliations, and roles of protocol contributors <b>(P1, P15-16)</b>                                                                                                                                                                                                                               |
|                                   | 5b      | Name and contact information for the trial sponsor <b>(P1, P6)</b>                                                                                                                                                                                                                                        |
|                                   | 5c      | Role of study sponsor and funders, if any, in study design; collection, management, analysis, and interpretation of data; writing of the report; and the decision to submit the report for publication, including whether they will have ultimate authority over any of these activities <b>(P6, P15)</b> |
|                                   | 5d      | Composition, roles, and responsibilities of the coordinating centre, steering committee, endpoint adjudication committee, data management team, and other individuals or groups overseeing the trial, if applicable (see Item 21a for data monitoring committee) <b>(P6-7, P11)</b>                       |
| <b>Introduction</b>               |         |                                                                                                                                                                                                                                                                                                           |
| Background and rationale          | 6a      | Description of research question and justification for undertaking the trial, including summary of relevant studies (published and unpublished) examining benefits and harms for each intervention <b>(P3-P5)</b>                                                                                         |
|                                   | 6b      | Explanation for choice of comparators <b>(P5)</b>                                                                                                                                                                                                                                                         |
| Objectives                        | 7       | Specific objectives or hypotheses <b>(P5-6)</b>                                                                                                                                                                                                                                                           |

1  
2  
3  
4  
5  
6  
7  
8  
9  
10  
11  
12  
13  
14  
15  
16  
17  
18  
19  
20  
21  
22  
23  
24  
25  
26  
27  
28  
29  
30  
31  
32  
33  
34  
35  
36  
37  
38  
39  
40  
41  
42  
43  
44  
45  
46  
47  
48  
49  
50  
51  
52  
53  
54  
55  
56  
57  
58  
59  
60

|              |   |                                                                                                                                                                                                                         |
|--------------|---|-------------------------------------------------------------------------------------------------------------------------------------------------------------------------------------------------------------------------|
| Trial design | 8 | Description of trial design including type of trial (eg, parallel group, crossover, factorial, single group), allocation ratio, and framework (eg, superiority, equivalence, noninferiority, exploratory) <b>(P6-7)</b> |
|--------------|---|-------------------------------------------------------------------------------------------------------------------------------------------------------------------------------------------------------------------------|

### **Methods: Participants, interventions, and outcomes**

|               |   |                                                                                                                                                                                                |
|---------------|---|------------------------------------------------------------------------------------------------------------------------------------------------------------------------------------------------|
| Study setting | 9 | Description of study settings (eg, community clinic, academic hospital) and list of countries where data will be collected. Reference to where list of study sites can be obtained <b>(P6)</b> |
|---------------|---|------------------------------------------------------------------------------------------------------------------------------------------------------------------------------------------------|

|                      |    |                                                                                                                                                                                                             |
|----------------------|----|-------------------------------------------------------------------------------------------------------------------------------------------------------------------------------------------------------------|
| Eligibility criteria | 10 | Inclusion and exclusion criteria for participants. If applicable, eligibility criteria for study centres and individuals who will perform the interventions (eg, surgeons, psychotherapists) <b>(P7-P8)</b> |
|----------------------|----|-------------------------------------------------------------------------------------------------------------------------------------------------------------------------------------------------------------|

|               |     |                                                                                                                                                                                                                        |
|---------------|-----|------------------------------------------------------------------------------------------------------------------------------------------------------------------------------------------------------------------------|
| Interventions | 11a | Interventions for each group with sufficient detail to allow replication, including how and when they will be administered <b>(Not applicable)</b>                                                                     |
|               | 11b | Criteria for discontinuing or modifying allocated interventions for a given trial participant (eg, drug dose change in response to harms, participant request, or improving/worsening disease) <b>(Not applicable)</b> |

|  |     |                                                                                                                                                                           |
|--|-----|---------------------------------------------------------------------------------------------------------------------------------------------------------------------------|
|  | 11c | Strategies to improve adherence to intervention protocols, and any procedures for monitoring adherence (eg, drug tablet return, laboratory tests) <b>(Not applicable)</b> |
|--|-----|---------------------------------------------------------------------------------------------------------------------------------------------------------------------------|

|  |     |                                                                                                                       |
|--|-----|-----------------------------------------------------------------------------------------------------------------------|
|  | 11d | Relevant concomitant care and interventions that are permitted or prohibited during the trial <b>(Not applicable)</b> |
|--|-----|-----------------------------------------------------------------------------------------------------------------------|

|          |    |                                                                                                                                                                                                                                                                                                                                                                                            |
|----------|----|--------------------------------------------------------------------------------------------------------------------------------------------------------------------------------------------------------------------------------------------------------------------------------------------------------------------------------------------------------------------------------------------|
| Outcomes | 12 | Primary, secondary, and other outcomes, including the specific measurement variable (eg, systolic blood pressure), analysis metric (eg, change from baseline, final value, time to event), method of aggregation (eg, median, proportion), and time point for each outcome. Explanation of the clinical relevance of chosen efficacy and harm outcomes is strongly recommended <b>(P8)</b> |
|----------|----|--------------------------------------------------------------------------------------------------------------------------------------------------------------------------------------------------------------------------------------------------------------------------------------------------------------------------------------------------------------------------------------------|

|                      |    |                                                                                                                                                                                          |
|----------------------|----|------------------------------------------------------------------------------------------------------------------------------------------------------------------------------------------|
| Participant timeline | 13 | Time schedule of enrolment, interventions (including any run-ins and washouts), assessments, and visits for participants. A schematic diagram is highly recommended <b>(see Figure1)</b> |
|----------------------|----|------------------------------------------------------------------------------------------------------------------------------------------------------------------------------------------|

|             |    |                                                                                                                                                                                                     |
|-------------|----|-----------------------------------------------------------------------------------------------------------------------------------------------------------------------------------------------------|
| Sample size | 14 | Estimated number of participants needed to achieve study objectives and how it was determined, including clinical and statistical assumptions supporting any sample size calculations <b>(P6-7)</b> |
|-------------|----|-----------------------------------------------------------------------------------------------------------------------------------------------------------------------------------------------------|

|             |    |                                                                                                 |
|-------------|----|-------------------------------------------------------------------------------------------------|
| Recruitment | 15 | Strategies for achieving adequate participant enrolment to reach target sample size <b>(P8)</b> |
|-------------|----|-------------------------------------------------------------------------------------------------|

### **Methods: Assignment of interventions (for controlled trials)**

Allocation:

|    |                |     |                                                                           |
|----|----------------|-----|---------------------------------------------------------------------------|
| 1  |                |     |                                                                           |
| 2  | Sequence       | 16a | Method of generating the allocation sequence (eg, computer-               |
| 3  | generation     |     | generated random numbers), and list of any factors for stratification.    |
| 4  |                |     | To reduce predictability of a random sequence, details of any planned     |
| 5  |                |     | restriction (eg, blocking) should be provided in a separate document      |
| 6  |                |     | that is unavailable to those who enrol participants or assign             |
| 7  |                |     | interventions <b>(Not applicable)</b>                                     |
| 8  |                |     |                                                                           |
| 9  | Allocation     | 16b | Mechanism of implementing the allocation sequence (eg, central            |
| 10 | concealment    |     | telephone; sequentially numbered, opaque, sealed envelopes),              |
| 11 | mechanism      |     | describing any steps to conceal the sequence until interventions are      |
| 12 |                |     | assigned <b>(Not applicable)</b>                                          |
| 13 |                |     |                                                                           |
| 14 | Implementation | 16c | Who will generate the allocation sequence, who will enrol participants,   |
| 15 |                |     | and who will assign participants to interventions <b>(Not applicable)</b> |
| 16 |                |     |                                                                           |
| 17 | Blinding       | 17a | Who will be blinded after assignment to interventions (eg, trial          |
| 18 | (masking)      |     | participants, care providers, outcome assessors, data analysts), and      |
| 19 |                |     | how <b>(Not applicable)</b>                                               |
| 20 |                |     |                                                                           |
| 21 |                | 17b | If blinded, circumstances under which unblinding is permissible, and      |
| 22 |                |     | procedure for revealing a participant's allocated intervention during     |
| 23 |                |     | the trial <b>(Not applicable)</b>                                         |
| 24 |                |     |                                                                           |
| 25 |                |     |                                                                           |

#### 26 **Methods: Data collection, management, and analysis**

|    |                 |     |                                                                          |
|----|-----------------|-----|--------------------------------------------------------------------------|
| 27 |                 |     |                                                                          |
| 28 | Data collection | 18a | Plans for assessment and collection of outcome, baseline, and other      |
| 29 | methods         |     | trial data, including any related processes to promote data quality (eg, |
| 30 |                 |     | duplicate measurements, training of assessors) and a description of      |
| 31 |                 |     | study instruments (eg, questionnaires, laboratory tests) along with      |
| 32 |                 |     | their reliability and validity, if known. Reference to where data        |
| 33 |                 |     | collection forms can be found, if not in the protocol <b>(P8-11)</b>     |
| 34 |                 |     |                                                                          |
| 35 |                 | 18b | Plans to promote participant retention and complete follow-up,           |
| 36 |                 |     | including list of any outcome data to be collected for participants who  |
| 37 |                 |     | discontinue or deviate from intervention protocols <b>(P11-12)</b>       |
| 38 |                 |     |                                                                          |
| 39 | Data            | 19  | Plans for data entry, coding, security, and storage, including any       |
| 40 | management      |     | related processes to promote data quality (eg, double data entry;        |
| 41 |                 |     | range checks for data values). Reference to where details of data        |
| 42 |                 |     | management procedures can be found, if not in the protocol <b>(P11)</b>  |
| 43 |                 |     |                                                                          |
| 44 |                 |     |                                                                          |
| 45 | Statistical     | 20a | Statistical methods for analysing primary and secondary outcomes.        |
| 46 | methods         |     | Reference to where other details of the statistical analysis plan can be |
| 47 |                 |     | found, if not in the protocol <b>(P12-P14)</b>                           |
| 48 |                 |     |                                                                          |
| 49 |                 | 20b | Methods for any additional analyses (eg, subgroup and adjusted           |
| 50 |                 |     | analyses) <b>(Not applicable)</b>                                        |
| 51 |                 |     |                                                                          |
| 52 |                 | 20c | Definition of analysis population relating to protocol non-adherence     |
| 53 |                 |     | (eg, as randomised analysis), and any statistical methods to handle      |
| 54 |                 |     | missing data (eg, multiple imputation) <b>(Not applicable)</b>           |
| 55 |                 |     |                                                                          |
| 56 |                 |     |                                                                          |
| 57 |                 |     |                                                                          |
| 58 |                 |     |                                                                          |
| 59 |                 |     |                                                                          |
| 60 |                 |     |                                                                          |

**Methods: Monitoring**

- 1  
2  
3  
4  
5  
6  
7  
8  
9  
10  
11  
12  
13  
14  
15  
16  
17  
18  
19  
20  
21  
22
- |                 |     |                                                                                                                                                                                                                                                                                                                                       |
|-----------------|-----|---------------------------------------------------------------------------------------------------------------------------------------------------------------------------------------------------------------------------------------------------------------------------------------------------------------------------------------|
| Data monitoring | 21a | Composition of data monitoring committee (DMC); summary of its role and reporting structure; statement of whether it is independent from the sponsor and competing interests; and reference to where further details about its charter can be found, if not in the protocol. Alternatively, an explanation of why a DMC is not needed |
|                 | 21b | Description of any interim analyses and stopping guidelines, including who will have access to these interim results and make the final decision to terminate the trial                                                                                                                                                               |
| Harms           | 22  | Plans for collecting, assessing, reporting, and managing solicited and spontaneously reported adverse events and other unintended effects of trial interventions or trial conduct <b>(P11)</b>                                                                                                                                        |
| Auditing        | 23  | Frequency and procedures for auditing trial conduct, if any, and whether the process will be independent from investigators and the sponsor                                                                                                                                                                                           |

**Ethics and dissemination**

- 23  
24  
25  
26  
27  
28  
29  
30  
31  
32  
33  
34  
35  
36  
37  
38  
39  
40  
41  
42  
43  
44  
45  
46  
47  
48  
49  
50  
51  
52  
53  
54  
55  
56  
57  
58  
59  
60
- |                               |     |                                                                                                                                                                                                                                                          |
|-------------------------------|-----|----------------------------------------------------------------------------------------------------------------------------------------------------------------------------------------------------------------------------------------------------------|
| Research ethics approval      | 24  | Plans for seeking research ethics committee/institutional review board (REC/IRB) approval <b>(P14)</b>                                                                                                                                                   |
| Protocol amendments           | 25  | Plans for communicating important protocol modifications (eg, changes to eligibility criteria, outcomes, analyses) to relevant parties (eg, investigators, REC/IRBs, trial participants, trial registries, journals, regulators) <b>(Not applicable)</b> |
| Consent or assent             | 26a | Who will obtain informed consent or assent from potential trial participants or authorised surrogates, and how (see Item 32) <b>(P8)</b>                                                                                                                 |
|                               | 26b | Additional consent provisions for collection and use of participant data and biological specimens in ancillary studies, if applicable <b>(Not applicable)</b>                                                                                            |
| Confidentiality               | 27  | How personal information about potential and enrolled participants will be collected, shared, and maintained in order to protect confidentiality before, during, and after the trial <b>(P11)</b>                                                        |
| Declaration of interests      | 28  | Financial and other competing interests for principal investigators for the overall trial and each study site <b>(P16)</b>                                                                                                                               |
| Access to data                | 29  | Statement of who will have access to the final trial dataset, and disclosure of contractual agreements that limit such access for investigators <b>(P11)</b>                                                                                             |
| Ancillary and post-trial care | 30  | Provisions, if any, for ancillary and post-trial care, and for compensation to those who suffer harm from trial participation <b>(Not applicable)</b>                                                                                                    |

- 1  
2  
3  
4  
5  
6  
7  
8  
9  
10  
11  
12  
13  
14  
15
- |                      |     |                                                                                                                                                                                                                                                                                                  |
|----------------------|-----|--------------------------------------------------------------------------------------------------------------------------------------------------------------------------------------------------------------------------------------------------------------------------------------------------|
| Dissemination policy | 31a | Plans for investigators and sponsor to communicate trial results to participants, healthcare professionals, the public, and other relevant groups (eg, via publication, reporting in results databases, or other data sharing arrangements), including any publication restrictions <b>(P14)</b> |
|                      | 31b | Authorship eligibility guidelines and any intended use of professional writers <b>(Not applicable)</b>                                                                                                                                                                                           |
|                      | 31c | Plans, if any, for granting public access to the full protocol, participant-level dataset, and statistical code <b>(Not applicable)</b>                                                                                                                                                          |

## 16 Appendices

- 16  
17  
18  
19  
20  
21  
22
- |                            |    |                                                                                                                                                                                                                        |
|----------------------------|----|------------------------------------------------------------------------------------------------------------------------------------------------------------------------------------------------------------------------|
| Informed consent materials | 32 | Model consent form and other related documentation given to participants and authorised surrogates <b>(see ICF)</b>                                                                                                    |
| Biological specimens       | 33 | Plans for collection, laboratory evaluation, and storage of biological specimens for genetic or molecular analysis in the current trial and for future use in ancillary studies, if applicable <b>(Not applicable)</b> |

---

23 \*It is strongly recommended that this checklist be read in conjunction with the SPIRIT 2013  
24 Explanation & Elaboration for important clarification on the items. Amendments to the  
25 protocol should be tracked and dated. The SPIRIT checklist is copyrighted by the SPIRIT  
26 Group under the Creative Commons "[Attribution-NonCommercial-NoDerivs 3.0 Unported](#)"  
27 license.  
28  
29  
30  
31  
32  
33  
34  
35  
36  
37  
38  
39  
40  
41  
42  
43  
44  
45  
46  
47  
48  
49  
50  
51  
52  
53  
54  
55  
56  
57  
58  
59  
60

# BMJ Open

## Machine learning for prediction of sudden cardiac death in heart failure patients with low left ventricular ejection fraction: study protocol for a retro-prospective multicenter registry in China

|                               |                                                                                                                                                                                                                                                                                                                                                                                                                                                                                                                                                                                                                                                                                                                                                                                                                                                                                                                                                                                                                                                                                                                                                                                                                                                                                                                                                                                                                                                                                                                                                                                                                                                                                                                                                                                                                                                                                                                                                                                                                                                                                                                                                                                       |
|-------------------------------|---------------------------------------------------------------------------------------------------------------------------------------------------------------------------------------------------------------------------------------------------------------------------------------------------------------------------------------------------------------------------------------------------------------------------------------------------------------------------------------------------------------------------------------------------------------------------------------------------------------------------------------------------------------------------------------------------------------------------------------------------------------------------------------------------------------------------------------------------------------------------------------------------------------------------------------------------------------------------------------------------------------------------------------------------------------------------------------------------------------------------------------------------------------------------------------------------------------------------------------------------------------------------------------------------------------------------------------------------------------------------------------------------------------------------------------------------------------------------------------------------------------------------------------------------------------------------------------------------------------------------------------------------------------------------------------------------------------------------------------------------------------------------------------------------------------------------------------------------------------------------------------------------------------------------------------------------------------------------------------------------------------------------------------------------------------------------------------------------------------------------------------------------------------------------------------|
| Journal:                      | <i>BMJ Open</i>                                                                                                                                                                                                                                                                                                                                                                                                                                                                                                                                                                                                                                                                                                                                                                                                                                                                                                                                                                                                                                                                                                                                                                                                                                                                                                                                                                                                                                                                                                                                                                                                                                                                                                                                                                                                                                                                                                                                                                                                                                                                                                                                                                       |
| Manuscript ID                 | bmjopen-2018-023724.R1                                                                                                                                                                                                                                                                                                                                                                                                                                                                                                                                                                                                                                                                                                                                                                                                                                                                                                                                                                                                                                                                                                                                                                                                                                                                                                                                                                                                                                                                                                                                                                                                                                                                                                                                                                                                                                                                                                                                                                                                                                                                                                                                                                |
| Article Type:                 | Protocol                                                                                                                                                                                                                                                                                                                                                                                                                                                                                                                                                                                                                                                                                                                                                                                                                                                                                                                                                                                                                                                                                                                                                                                                                                                                                                                                                                                                                                                                                                                                                                                                                                                                                                                                                                                                                                                                                                                                                                                                                                                                                                                                                                              |
| Date Submitted by the Author: | 25-Oct-2018                                                                                                                                                                                                                                                                                                                                                                                                                                                                                                                                                                                                                                                                                                                                                                                                                                                                                                                                                                                                                                                                                                                                                                                                                                                                                                                                                                                                                                                                                                                                                                                                                                                                                                                                                                                                                                                                                                                                                                                                                                                                                                                                                                           |
| Complete List of Authors:     | <p>Meng, Fanqi; The First Affiliated Hospital of Nanjing Medical University, Department of Cardiology; Xiamen Cardiovascular Hospital, Xiamen University, Department of Cardiology</p> <p>Zhang, Zhihua; The First Affiliated Hospital of Nanjing Medical University,, Department of Cardiology; Jiangning Hospital Affiliated to Nanjing Medical University, Department of Cardiology</p> <p>Hou, Xiaofeng; The First Affiliated Hospital of Nanjing Medical University, Department of Cardiology</p> <p>Qian, Zhiyong; The First Affiliated Hospital of Nanjing Medical University, Department of Cardiology</p> <p>Wang, Yao; The First Affiliated Hospital of Nanjing Medical University, Department of Cardiology</p> <p>Chen, Yanhong; Wuhan Asia Heart Hospital, Department of Cardiology</p> <p>Wang, Yilian; The Second People's Hospital of Lianyungang, Department of Cardiology,</p> <p>Zhou, Ye; The Affiliated Hospital of Jiangsu University, Department of Cardiology</p> <p>Chen, Zhen; Taixing People's Hospital, Department of Cardiology</p> <p>Zhang, Xiwen; The First People's Hospital of Huaian, Department of Cardiology</p> <p>Yang, Jing; The First People's Hospital of Huaian, Department of Cardiology</p> <p>Zhang, Jinlong; The First People's Hospital of Yancheng, Department of Cardiology</p> <p>Guo, Jianghong; Rugao People's Hospital, Department of Cardiology</p> <p>Li, Kebei; The First People's Hospital of Zhangjiagang, Department of Cardiology</p> <p>Chen, Lu; The Third People's Hospital of Suzhou, Department of Cardiology</p> <p>Zhuang, Ruijuan; The Third People's Hospital of Wuxi, Department of Cardiology</p> <p>Jiang, Hai; The Second Affiliated Hospital of Nanjing Medical University, Department of Cardiology</p> <p>Zhou, Weihua; University of Southern Mississippi, School of Computing</p> <p>Tang, Shaowen; Nanjing Medical University, Department of Epidemiology</p> <p>Wei, Yongyue; Nanjing Medical University, Department of Biostatistics</p> <p>Zou, Jiangang; the First Affiliated Hospital of Nanjing Medical University, Department of Cardiology; Nanjing Medical University, Key Laboratory of</p> |

1  
2  
3  
4  
5  
6  
7  
8  
9  
10  
11  
12  
13  
14  
15  
16  
17  
18  
19  
20  
21  
22  
23  
24  
25  
26  
27  
28  
29  
30  
31  
32  
33  
34  
35  
36  
37  
38  
39  
40  
41  
42  
43  
44  
45  
46  
47  
48  
49  
50  
51  
52  
53  
54  
55  
56  
57  
58  
59  
60

|                                  |                                                                                                                                    |
|----------------------------------|------------------------------------------------------------------------------------------------------------------------------------|
|                                  | Targeted Intervention of Cardiovascular Disease, Collaborative Innovation Center for Cardiovascular Disease Translational Medicine |
| <b>Primary Subject Heading</b> : | Medical management                                                                                                                 |
| Secondary Subject Heading:       | Cardiovascular medicine                                                                                                            |
| Keywords:                        | Heart failure < CARDIOLOGY, sudden cardiac death, machine learning, risk model                                                     |
|                                  |                                                                                                                                    |

SCHOLARONE™  
Manuscripts



# Machine learning for prediction of sudden cardiac death in heart failure patients with low left ventricular ejection fraction: study protocol for a retro-prospective multicenter registry in China

Fanqi Meng,<sup>1,2</sup> Zhihua Zhang,<sup>1,3</sup> Xiaofeng Hou,<sup>1</sup> Zhiyong Qian,<sup>1</sup> Yao Wang,<sup>1</sup> Yanhong Chen,<sup>4</sup> Yilian Wang,<sup>5</sup> Ye Zhou,<sup>6</sup> Zhen Chen,<sup>7</sup> Xiwen Zhang,<sup>8</sup> Jing Yang,<sup>8</sup> Jinlong Zhang,<sup>9</sup> Jianghong Guo,<sup>10</sup> Kebei Li,<sup>11</sup> Lu Chen,<sup>12</sup> Ruijuan Zhuang,<sup>13</sup> Hai Jiang,<sup>14</sup> Weihua Zhou,<sup>15</sup> Shaowen Tang,<sup>16</sup> Yongyue Wei,<sup>17</sup> Jiangang Zou<sup>1, 18\*</sup>

## Author affiliations

<sup>1</sup>Department of Cardiology, The First Affiliated Hospital of Nanjing Medical University, Nanjing, China

<sup>2</sup>Department of Cardiology, Xiamen Cardiovascular Hospital, Xiamen University, Xiamen, China

<sup>3</sup>Department of Cardiology, Jiangning Hospital Affiliated to Nanjing Medical University, Nanjing, China

<sup>4</sup>Department of Cardiology, Wuhan Asia Heart Hospital, Wuhan, China

<sup>5</sup>Department of Cardiology, The Second People's Hospital of Lianyungang, Lianyungang, China

<sup>6</sup>Department of Cardiology, The Affiliated Hospital of Jiangsu University, Zhenjiang, China

<sup>7</sup>Department of Cardiology, Taixing People's Hospital, Taixing, China

<sup>8</sup>Department of Cardiology, The First People's Hospital of Huaian, Huaian, China

<sup>9</sup>Department of Cardiology, The First People's Hospital of Yancheng, Yancheng, China

<sup>10</sup>Department of Cardiology, Rugao People's Hospital, Rugao, China

<sup>11</sup>Department of Cardiology, The First People's Hospital of Zhangjiagang, Zhangjiagang, China

<sup>12</sup>Department of Cardiology, The Third People's Hospital of Suzhou, Suzhou, China

<sup>13</sup>Department of Cardiology, The Third People's Hospital of Wuxi, Wuxi, China

<sup>14</sup>Department of Cardiology, The Second Affiliated Hospital of Nanjing Medical University, Nanjing, China

<sup>15</sup>School of Computing, University of Southern Mississippi, Hattiesburg, USA.

<sup>16</sup>Department of Epidemiology, Nanjing Medical University, Nanjing, China

<sup>17</sup>Department of Biostatistics, Nanjing Medical University, Nanjing, China

<sup>18</sup>Key Laboratory of Targeted Intervention of Cardiovascular Disease, Collaborative Innovation Center for Cardiovascular Disease Translational Medicine, Nanjing Medical University, China

## \*Correspondence to

Dr Jiangang Zou: Department of Cardiology, the First Affiliated Hospital of Nanjing Medical University, 300 Guangzhou Road, Nanjing, 210029, P.R.China; E-mail: [jjzou@njmu.edu.cn](mailto:jjzou@njmu.edu.cn); Tel. phone: +86 13605191407

**Keywords:** heart failure, sudden cardiac death, machine learning, risk model

## ABSTRACT

### Introduction

Left ventricular ejection fraction (LVEF)  $\leq 35\%$ , as current significant implantable cardioverter-defibrillator (ICD) indication for primary prevention of sudden cardiac death (SCD) in heart failure (HF) patients, has been widely recognized to be inefficient. Improvement of patient selection for low LVEF ( $\leq 35\%$ ) is needed to optimize deployment of ICD. Most of the existing prediction models are not appropriate to identify ICD candidates at high risk of SCD in HF patients with low LVEF. Compared to traditional statistical analysis, machine learning (ML) can employ computer algorithms to identify patterns in large datasets, analyze rules automatically and build both linear and non-linear models in order to make data-driven predictions. This study is aimed to develop and validate new models using ML to improve the prediction of SCD in HF patients with low LVEF.

### Methods and analysis

We will conduct a retro-prospective, multi-center, observational registry of Chinese HF patients with low LVEF. The HF patients with LVEF  $\leq 35\%$  after optimized medication at least 3 months will be enrolled in this study. The primary endpoints are all-cause death and SCD. The secondary endpoints are malignant arrhythmia, sudden cardiac arrest, cardiopulmonary resuscitation and rehospitalization due to HF. The baseline demographic, clinical, biological, electrophysiological, social and psychological variables will be collected. Both ML and traditional multivariable COX proportional hazards regression models will be developed and compared in the prediction of SCD. Moreover, the ML model will be validated in a prospective study.

### Ethics and dissemination

The study protocol has been approved by the Ethics Committee of the First Affiliated Hospital of Nanjing Medical University (2017-SR-06). All results of this study will be

published in international peer-reviewed journals and presented at relevant conferences.

**Clinical trial registration** ChiCTR-POC-17011842.

### **Strengths and limitations of this study**

- This study is the first multicenter registry study in China, aimed to investigate the feasibility and accuracy of applying ML to predict SCD in HF patients with low LVEF.
- A broad range of outcomes, including SCD, all-cause death, lethal arrhythmia, sudden cardiac arrest, cardiopulmonary resuscitation and rehospitalization due to HF, will be evaluated in this study, and the corresponding prognostic models will be developed.
- Machine learning and the traditional multivariable COX proportional hazards regression model will be derived from the same database and be compared.
- HF patients with LVEF>35% will not be included based on the design of this study, which will restrict the application of the results of this study to the HF with low LVEF,
- It might be difficult to determine the endpoint of this study sometimes for some patients, when dealing with SCD, lethal arrhythmia and sudden cardiac arrest, especially when outside the hospital.

## INTRODUCTION

Heart failure (HF), has become a major public health problem with increased prevalence in both Asia and Western countries. The prevalence of HF in Asia is 1.2%-6.7% depending on the population studied.<sup>[1]</sup> In China, there are 4.2 million HF patients, and 500,000 new cases are being diagnosed each year.<sup>[1]</sup> Although the survival rate after HF diagnosis has been increased due to improvement in medical therapy, the mortality of HF remains high. Around 50% of people diagnosed with HF will die within 5 years.<sup>[2]</sup> The two most common causes of death in patients with HF are sudden cardiac death (SCD) and progressive pump failure. SCD in HF patients is usually caused by lethal arrhythmias such as ventricular tachycardia or ventricular fibrillation, and is reported to be responsible for nearly 50% of all cardiovascular death in HF patients.<sup>[3, 4]</sup>

The most effective strategy for prevention of SCD in patients with HF is the implantable cardioverter-defibrillator (ICD), associated with 54% relative risk reduction in primary prevention<sup>[5]</sup>, and 50% relative risk reduction in arrhythmia-related death in secondary prevention.<sup>[6]</sup> There is a higher risk of SCD in patients with LVEF $\leq$  35% than with LVEF $>$ 35%.<sup>[7]</sup> At present, left ventricular ejection fraction (LVEF)  $\leq$ 35% is the major ICD indication for primary prevention of SCD.<sup>[8]</sup> However, real-world data show that only 3% to 5% of ICD patients for primary prevention with LVEF $\leq$ 35% receive shock therapies on an annual basis,<sup>[9]</sup> whereas some SCD victims have LVEF $>$ 35%.<sup>[10, 11]</sup> Identifying the patients who will be most likely to benefit from primary prevention ICD, is urgently needed. Based on the latest literature, LVEF $\leq$ 35% is still an independent predictor of all-cause and cardiovascular mortality in chronic systolic HF, and displays a

1  
2  
3  
4 better combination of sensitivity and specificity than 40% cut-off.<sup>[12]</sup> Finding ways to  
5 evaluate the SCD risk in patients with lower EF will be more efficient and economically  
6 significant. Furthermore, a noticeable decline in the rate of SCD for HF patients with  
7 reduced LVEF has been observed, which was consistent with the cumulative benefit of  
8 optimizing medication including angiotensin converting enzyme inhibitor (ACEI) or  
9 angiotensin receptor blocker (ARB), beta-blocker, and mineralocorticoid receptor  
10 antagonist (MRAs).<sup>[13]</sup> Therefore, it is imperative to update the criterion for ICD  
11 implantation  
12  
13  
14  
15  
16  
17  
18

19 Over the last decade, lots of multivariate prognostic models derived for chronic HF  
20 patients have been proposed (Table 1).<sup>[14-25]</sup> However, these models are not appropriate to  
21 identify ICD candidates at high risk of SCD in HF patients with low LVEF. Most above  
22 prognostic scores were developed from trial databases, and the subjects included various  
23 types of heart failure. There is no specific study for the prognosis of low LVEF  
24 population. Additionally, although all the scores are “not parsimonious”, some critical  
25 factors are not incorporated into the prognostic models, for example, medications are  
26 contained in I-PRESERVE<sup>[17]</sup>, MAGGIC<sup>[21]</sup> and 3C-HF<sup>[23]</sup>. Optimized medication was  
27 not required as inclusion criteria in all 12 studies. Furthermore, the most above  
28 prognostic models are not able to predict SCD risk. In recent years, the advances in strain  
29 echocardiography<sup>[26, 27]</sup>, cardiac magnetic resonance<sup>[26, 27]</sup> and cardiac radionuclide  
30 imaging<sup>[28, 29]</sup> have provided essential insights into the mechanisms of ventricular  
31 arrhythmias, and have been recommended to predict the SCD in patients with HF.  
32 Although these new methods are effective and noninvasive, the widespread use in large  
33 HF population to predict SCD is difficult, due to high equipment and technical  
34 requirements. Resting 12-lead ECG and Holter, as the longest surviving, broadly  
35 available, quickly deployed and inexpensive tests, can provide a measure of cumulative  
36 electrical risk, which may be combined with other factors to improve the SCD risk  
37 prediction.<sup>[30]</sup>  
38  
39  
40  
41  
42  
43  
44  
45  
46  
47  
48  
49  
50  
51  
52  
53  
54  
55  
56  
57  
58  
59  
60

1  
2  
3  
4 Based on above reasons, the novel risk assessment tools should meet the following  
5 requirements: (1) the risk model should be developed from the population with low  
6 LVEF ( $\leq 35\%$ ) to accelerate its clinical application and promote the accuracy of ICD  
7 indications for primary prevention. (2) More cardiac and non-cardiac factors beyond  
8 LVEF should be included. (3) Electrical risk factors should be included as candidate  
9 predictors to evaluate the risk of sudden arrhythmic death. (4) Although sometimes it is  
10 not easy to determine the cause of death, SCD as the primary endpoint should be defined  
11 whenever possible.  
12  
13  
14  
15  
16  
17  
18

19 Data processing is the crucial step to develop the prognostic models. This study  
20 involves non-linear prediction models, a large number of patients and numerous  
21 predictors with complicated correlations. Traditional hypothesis-driven statistical analysis  
22 is difficult to overcome these challenges. The machine learning (ML) approaches have  
23 great potential to improve the solution. They employ computer algorithms to identify  
24 patterns in large datasets with a large number of variables, analyze rules automatically  
25 and build both linear and non-linear models in order to make data-driven predictions or  
26 decisions.<sup>[31]</sup> Weng et al. <sup>[32]</sup> found that ML significantly improved the accuracy of  
27 cardiovascular risk prediction, increased the number of patients who could benefit from  
28 preventive treatment and avoided unnecessary treatment. Recent studies have shown that  
29 the application of machine learning techniques may have the potential to improve heart  
30 failure outcomes and management, including cost savings by improving existing  
31 diagnostic and treatment support systems.<sup>[33]</sup> However, ML has not been reported to be  
32 applied to SCD risk prediction based on large HF population. Therefore, the application  
33 of ML for the prediction of SCD in HF patients with low LVEF is technically innovative  
34 and clinically significant.  
35  
36  
37  
38  
39  
40  
41  
42  
43  
44  
45  
46  
47  
48  
49  
50  
51

## 52 AIMS

53  
54 The purpose of our study is to develop and validate new models to improve the prediction  
55  
56  
57  
58  
59  
60

of SCD in HF patients with low LVEF. The new strategies of identifying HF patients most likely to benefit from primary prevention ICD will improve the revolution of ICD indications. The specific research objective is to develop prediction models to evaluate prognosis and SCD risk respectively by ML methods and traditional COX proportional hazard regression in HF patients with low LVEF ( $\leq 35\%$ ).

## METHODS AND ANALYSIS

### Study design

This study is a retro-prospective, multi-center, non-interventional, observational clinical registry. The primary sponsor is The First Affiliated Hospital of Nanjing Medical University. This study has been registered in the Chinese Clinical Trial Registry (ChiCTR-POC-17011842). The study will be conducted across 14 cardiovascular departments in Tertiary A hospitals throughout the People's Republic of China. (see Supplement)

The cases from January 2016 to December 2017 in the First Affiliated Hospital of Nanjing Medical University and Xiamen Cardiovascular Hospital Xiamen University will be collected retrospectively and followed-up prospectively. About 500 retrospective cases meet the inclusion criteria according to preliminary estimation. The prospective recruitment has started in the above 14 hospitals since January 2018. The retrospective cases and the first 1000 prospective cases will be used to develop the prediction models. And the next 1000 prospective cases will be used for model validation. The flow diagram of the progress is illustrated in Figure 1.

### Inclusion criteria

To participate in this study, patients must comply with all of the following

1. Diagnosis of HF<sub>r</sub>EF according to the 2016 ESC HF Guideline<sup>[8]</sup>
2. LVEF $\leq 35\%$  (measured by Simpson's methods) after optimized medication including

1  
2  
3  
4 ACEI or ARB, beta-blocker and MRA if available and not contraindicated at least 3  
5 months.

6  
7 3. Signed informed consent.  
8  
9

### 10 11 **Exclusion criteria**

12  
13 The patient with any of the following will be excluded:  
14

- 15 1. Hypertrophic cardiomyopathy
- 16 2. Rheumatic heart disease
- 17 3. Congenital heart disease
- 18 4. Pulmonary heart disease
- 19 5. Pericardial diseases and myocarditis
- 20 6. Acute myocardial infarction in recent 3 months, including STEMI and NSTEMI
- 21 7. Aortic dissection
- 22 8. Severe hematologic disease including leukemia, lymphoma, aplastic anemia, etc.
- 23 9. Autoimmune disease
- 24 10. Malignant tumor
- 25 11. Hormone replacement
- 26 12. Application of other interventional clinical trials
- 27 13. Non-drug therapies for improving heart function: CRT-P/D, ICD, heart  
28 transplantation, surgical resection of ventricular aneurysm, interventional left ventricular  
29 restoration with Revivent<sup>(TM)</sup> / Parachute<sup>(TM)</sup> system), MitraClip therapy for recurrent  
30 mitral regurgitation

### 31 32 33 34 35 36 37 38 39 40 41 42 43 44 45 46 47 48 49 **Endpoints**

#### 50 51 ***Primary endpoint***

52  
53 All-cause death and SCD, including cardiac death and death from other causes

#### 54 55 ***Secondary endpoint***



1  
2  
3  
4 Lethal arrhythmia, sudden cardiac arrest, cardiopulmonary resuscitation, rehospitalization  
5 due to HF  
6  
7  
8

### 9 **Recruitment and consent**

10  
11 Participants will be identified and recruited at each of the participating centers. The  
12 clinical status of potential participants will be assessed, and their medical records will  
13 also be reviewed to confirm the eligibility according to the inclusion and exclusion  
14 criteria.  
15  
16  
17  
18

19 The study details will be explained to all potentially eligible and interesting subjects.  
20 The patients who agree to attend this study will sign the informed consent form (ICF)  
21 indicating that they fully understand the study and their rights of confidentiality and  
22 withdrawal from the study without giving a reason.  
23  
24  
25  
26  
27  
28

### 29 **Baseline evaluation**

30  
31 Prognostic models of HF in the last 10 years have been reviewed, and the associated risk  
32 factors have been ranked according to their corresponding hazard ratio in respective risk  
33 models (Table 1, Figure 2). Age, sex, New York Heart Association (NYHA) class, LVEF,  
34 prior HF hospitalization, course of HF, severe valvular heart disease, atrial fibrillation,  
35 prior myocardial infarction / coronary artery bypass grafting (CABG), renal dysfunction,  
36 chronic obstructive pulmonary disease (COPD), diabetes mellitus, ischemic etiology,  
37 decreased systolic pressure, low body mass index (BMI), anemia, hyponatremia, high  
38 N-terminal pro-brain natriuretic peptide (NT-proBNP), uricemia, current smoker were  
39 included. Variables which were not listed in previous models but appear relevant to  
40 higher risk of SCD in HF patients, and would therefore, merit consideration, including  
41 syncope or pre-syncope, frequent premature ventricular beat, non-sustained ventricular  
42 tachycardia, complete left bundle branch block (CLBBB), long QT interval, increased QT  
43 dispersion. In addition, self-care ability, social support and psychological state including  
44  
45  
46  
47  
48  
49  
50  
51  
52  
53  
54  
55  
56  
57  
58  
59  
60

1  
2  
3  
4 depression and anxiety, are also predictors for subsequent poor prognosis in HF patients.  
5  
6 The above risk factors have been assessed and confirmed by an expert panel of  
7  
8 cardiologists and statisticians and will be collected in this study particularly.

9  
10 The baseline data that will be collected in all eligible subjects are as follows.

- 11 ● Demographic characteristics: date of birth, gender, height and weight
- 12 ● Lifestyle behavior: smoking and drinking status
- 13 ● Vital signs: blood pressure and heart rate
- 14 ● NYHA class
- 15 ● Etiology of heart failure: The ischemic etiology will be confirmed if any following  
16 point is met: a. prior myocardial infarction or revascularization history (coronary  
17 artery bypass grafting, CABG / percutaneous coronary intervention, PCI); b. left main  
18 or proximal segment of the left anterior descending artery stenosis  $\geq 75\%$  showed by  
19 coronary angiogram (CAG); c. at least two main coronary artery branches stenosis  
20  $\geq 75\%$  showed by CAG. Otherwise, non-ischemic HF should be identified.
- 21 ● Prior HF hospitalization history: first HF hospitalization or not, times of prior HF  
22 hospitalization, the course of HF (since the HF symptoms appear; if unavailable,  
23 since the decreased EF was found).
- 24 ● Coronary heart disease history: myocardial infarction or angina history, CAG result,  
25 revascularization history, recent angina.
- 26 ● Arrhythmia history: atrial fibrillation, atrial flutter, premature atrial contraction  
27 (PAC), premature ventricular contraction (PVC), non-sustained VT (NSVT),  
28 sustained VT (SVT), ventricular fibrillation, and some bradyarrhythmias.
- 29 ● Syncope or pre-syncope history
- 30 ● Cardiac arrest/ cardiopulmonary resuscitation history
- 31 ● Other histories: hypertension, diabetes mellitus, COPD, etc.
- 32 ● Echocardiography: LV end-diastolic volume (LVEDV), LV end-systolic volume  
33 (LVESV) and LVEF measured by Simpson's method; Left atrial diameter, LV  
34  
35  
36  
37  
38  
39  
40  
41  
42  
43  
44  
45  
46  
47  
48  
49  
50  
51  
52  
53  
54  
55  
56  
57  
58  
59  
60

1  
2  
3  
4 end-diastolic diameter (LVEDD) and LV end-systolic diameter (LVESD), pulmonary  
5 artery systolic pressure. The status of valve regurgitation will be evaluated (0-none;  
6 1-mild; 2-mild to moderate; 3-moderate; 4- severe)  
7  
8

- 9 ● ECG: Left / right bundle branch block will be recorded. QRS duration and QT  
10 interval will be tested, and QT dispersion will be calculated.  
11
- 12 ● Holter: total heartbeat of the whole day, minimum/ maximum/ average HR, onset of  
13 PVC, PAC, NSVT, VT, atrial fibrillation/ flutter.  
14
- 15 ● Laboratory tests results: serum creatinine, blood urea nitrogen (BUN), serum sodium,  
16 hemoglobin, Thyroid Stimulating Hormone (TSH), free triiodothyronine (FT3), free  
17 thyroxine (FT4), NT-proBNP.  
18
- 19 ● Medication: ACEI/ARB 、 beta-blocker, aldosterone antagonist, diuretic, digoxin,  
20 antiplatelet agent, anticoagulant, statin, calcium channel blocker, antiarrhythmics,  
21 Ivabradine and angiotensin receptor blocker-neprilysin inhibitor (ARNI).  
22
- 23 ● Evaluation of self-care behavior and social support: 9-item European Heart Failure  
24 Self-care Behavior Scale (9-EHFScBS )<sup>[34]</sup> will be used to determine the self-care  
25 levels in HF patients. Social Support Rating Scale (SSRS)<sup>[35]</sup> will be used to evaluate  
26 the social support condition in HF patients.  
27
- 28 ● Assessment of psychological status: Hamilton Depression Scale (HAMD) and  
29 Hamilton Anxiety Scale (HAMA).  
30
- 31 ● Socioeconomic and educational status: marital status, educational status, monthly  
32 income, sources of medical expenses, medical insurance  
33  
34  
35  
36  
37  
38  
39  
40  
41  
42  
43  
44  
45

#### 46 **Patient visits**

47  
48 After being enrolled in this research, all the subjects will be followed-up periodically in  
49 the outpatient department or by telephone interview every 3 months. The compliance  
50 with medications will be evaluated. As the primary endpoint, all-cause death and SCD  
51 will be focused. Cause of death will be analyzed in detail. SCD is defined by the World  
52  
53  
54  
55  
56  
57  
58  
59  
60

1  
2  
3  
4 Health Organization as unexpected death that occurs within 1 hour from the onset of new  
5 or worsening symptoms (witnessed arrest) or, if unwitnessed, within 24h from when the  
6 individual was last observed alive and asymptomatic<sup>[36]</sup>. The lethal arrhythmia including  
7 VT/VF, sudden cardiac arrest, cardiopulmonary resuscitation, and rehospitalization due  
8 to HF will be recorded carefully.  
9  
10  
11  
12

13 During follow-up, lethal arrhythmia will be recognized more precisely for patients who  
14 receive ICD or CRT/D implantation, and will be recorded as an adverse event. The  
15 patients, who receive CRT-P/D, heart transplantation, surgical resection of a ventricular  
16 aneurysm, interventional left ventricular restoration with Revivent<sup>(TM)</sup> / Parachute<sup>(TM)</sup>  
17 system), MitraClip therapy for recurrent mitral regurgitation, or some other non-drug  
18 therapy to improve heart function, will be followed up as usual.  
19  
20  
21  
22  
23  
24  
25  
26

### 27 **Data collection**

28  
29 In the prospective part, clinical data of subjects will be collected and filled in the  
30 electrical data capture (EDC) system at baseline and particular follow-up visit. In the  
31 retrospective part, the same baseline information, except for 9-EHFScBS, SSRS, HAMD,  
32 HAMA questionnaires, will also be captured and input into the EDC system. The  
33 following prospective visits (every three months) will be conducted regularly and will be  
34 recorded in the EDC system. Investigators will record all the information of adverse  
35 events (AE), study bias, withdrawal from the study or death in EDC system. In this study,  
36 the participants will be identified by study codes, and their names will not appear in the  
37 EDC system. All the personal information including contact information, medical record  
38 and outcome, will not be revealed to any person who has not been authorized by a  
39 principal investigator. Professional staffs are responsible for database management, data  
40 maintenance and regular data backup. Data quality will be monitored regularly. The data  
41 collection checklist is showed in Table 2.  
42  
43  
44  
45  
46  
47  
48  
49  
50  
51  
52  
53  
54  
55  
56  
57  
58  
59  
60

## Data pre-processing

All above-collected variables, which might be predictors of all adverse prognosis of HF described in endpoint events, will be classified as uncontrollable variables (e.g. age, gender, history), controllable variables associated with heart (e.g. NYHA class, LVEF, increased heart rate) and controllable variables beyond heart (e.g. smoking, anemia, diabetes mellitus). Appropriate dummy variables will be used for binary variables and categorical variables, and quantitative variables will be fitted as a single continuous measurement (e.g. age, heart rate, NT-proBNP), unless there is clear evidence of nonlinearity. In order to create a practice simple risk score, some continuous variables will also be categorized into several groups according to both common clinical cut points and expert advice.

## Machine learning

Variable selection is the process of selecting a subset of relevant variables for use in model construction, which can substantially reduce the abundant information and decrease the number of variables that are input to the prediction model. In this study, the technique named as “information gain ranking” will be used to select appropriate variables. Information gain represents the effectiveness of a variable based on entropy, which characterizes the unpredictability of a system. The information gain of a variable is evaluated as the entropy difference of the system when including and excluding this variable. Then the variables whose information gain scores are less than a threshold are considered to be insignificant and will be excluded from the prediction.

Prediction models for SCD in HF patients will be developed by the following classification algorithms respectively: decision trees, logistic regression, support vector machine, random forest, and artificial neural network. [29] The performance and general error estimation of these ML models will be assessed by 10-fold cross-validation. The dataset will be randomly divided into 10 equal folds. 9 folds will be used as the training

1  
2  
3  
4 set with the remaining one fold as the validation set. The validation results from 10  
5 repeats will be combined to provide a measure of the overall performance. The prediction  
6 models derived from the above classification algorithms above will be evaluated based on  
7 the accuracy and interpretability. Finally, clinical experts and computer specialists will  
8 discuss and choose the best model to predict the prognosis of SCD in HF patients and  
9 then perform further validation with the prospective dataset.  
10  
11  
12  
13  
14  
15

### 16 17 **COX proportional hazards regression**

18  
19 Univariable COX proportional hazards modeling will be used to identify strong  
20 independent baseline candidate predictors for the primary and secondary outcomes. We  
21 will use both forward and backward stepwise procedure to derive the multivariable COX  
22 proportional hazards model with  $p < 0.05$  as the inclusion criterion. Every variable in the  
23 model will be multiplied by its  $\beta$  -coefficient, and the products will be summed to  
24 calculate the risk score. Risk function will be used to estimate the level of risk. The  
25 calculating formula is as follows.<sup>[37]</sup>  
26  
27  
28  
29  
30  
31

$$32 \quad P = h(t_j; X_k) = h_0(t_j) \exp(SCORE)$$

$$33 \quad SCORE = X_k \beta_k = \beta_0 + \beta_1 x_1 + \beta_2 x_2 + \dots + \beta_p x_p$$

### 34 35 36 37 38 **Model validation**

39  
40 The dynamic prospective cases will be used for external validation of the optimal ML and  
41 COX proportional hazards models. The validation will be performed using the models to  
42 calculate the probability of the outcome of interest occurring for each individual included  
43 in the validation sample when compared with the events actually observed to occur in this  
44 sample. The discrimination of each model will be estimated by receiver-operating  
45 characteristic (ROC) curve. The calibration of the models will be assessed by the  
46 Hosmer-Lemeshow goodness-of-fit test. The ML prediction model will be compared with  
47 the COX proportional hazards regression model.  
48  
49  
50  
51  
52  
53  
54  
55  
56  
57  
58  
59  
60

### **Patient and public involvement statement**

During the design of this study, a survey of patient requirements, including communication needs, follow-up frequency, visit cost etc., was conducted in population of potential HF participants, which provided important evidence for drawing up this study protocol to meet most of the patients' needs, build close contact with patients, enhance the overall adherence and improve the accuracy of endpoint event. This study is not a patient-led research, and patients are not involved in the recruitment of the study. The study results will be informed to the participants by phone at the end of this study. The alive patients will be evaluated with the new prediction model, and the ICD intervention will be recommended to the high SCD risk patients.

### **Study timeframe**

The retrospective data collection in the two sub-centers started in March 2017, and prospective enrollment in all 14 sub-centers has started in January 2018. The follow-up period is scheduled to end in December 2019. The major part of data analysis will be performed from January to March 2020. The study framework and process is summarized in Figure 3.

### **ETHICS AND DISSEMINATION**

The study protocol has been approved by the Ethics Committee of The First Affiliated Hospital of Nanjing Medical University (2017-SR-06). All necessary information about this study will be disclosed to the patients. Every subject will be asked to sign the ICF, indicating that they fully understand the study and voluntarily participate in this study. All results of this study will be published in international peer-reviewed journals and presented at relevant conferences.

### **DISCUSSION**

The evaluation of SCD risk in HF patients is a problem that urgently needed to be solved. The existing prediction strategies for the SCD risk in HF patients lack clinical practice value for various reasons. ICD indication for primary prevention of SCD could be optimized by identifying the high SCD risk patients in HF with low LVEF ( $\leq 35\%$ ). It is of great practical value and economic significance.

We reviewed some predictive studies of HF in the past years and ranked the risk factors according to their corresponding hazard ratio, which have been included in our study as candidate risk factors. Otherwise, some other variables which appear relevant to risk of SCD in HF patients are also collected. Therefore, the efficiency and practicality of predictive model development has been highly improved.

This study is the first multicenter registry study in China, aimed to investigate the feasibility and accuracy of applying ML to predict SCD in HF patients with low LVEF. A broad range of outcomes, including SCD, all-cause death, lethal arrhythmia, sudden cardiac arrest, cardiopulmonary resuscitation and rehospitalization due to HF, will be evaluated in this study, and the corresponding prognostic models will be developed. Machine learning and the traditional multivariable COX proportional hazards regression model will be derived from the same database and will be compared.

The limitations of this study are as follows: 1. HF patients with LVEF $>35\%$  will not be included based on the design of this study, which will restrict the application of the results of this study to the HF with low LVEF. 2. It might be difficult to determine the endpoint of this study sometimes for some patients, when dealing with SCD, lethal arrhythmia and sudden cardiac arrest, especially when outside the hospital.

Table 1. The risk model for HF in the literature

| Author                   | Database | Year | Variables (n) | Patients (n) | Endpoints                                       |
|--------------------------|----------|------|---------------|--------------|-------------------------------------------------|
| Agostoni <sup>[14]</sup> | MECKI    | 2012 | 6             | 2716         | Cardiovascular death; urgent cardiac transplant |
| Barlera <sup>[15]</sup>  | GISSI-HF | 2013 | 14            | 6975         | all-cause mortality                             |



|                          |                |      |    |       |                                                                             |
|--------------------------|----------------|------|----|-------|-----------------------------------------------------------------------------|
| Collier <sup>[16]</sup>  | EMPHASIS-HF    | 2013 | 10 | 2737  | all-cause mortality                                                         |
| Komajda <sup>[17]</sup>  | I-PRESERVE     | 2011 | 12 | 4128  | all-cause mortality                                                         |
| Levy <sup>[18]</sup>     | SHFM           | 2006 | 14 | 1125  | Survival                                                                    |
| O'Connor <sup>[19]</sup> | HF-ACTION      | 2012 | 4  | 2331  | all-cause mortality                                                         |
| Pocock <sup>[20]</sup>   | CHARM          | 2006 | 21 | 7599  | all-cause mortality                                                         |
| Pocock <sup>[21]</sup>   | MAGIC          | 2012 | 13 | 39372 | all-cause mortality                                                         |
| Senni <sup>[22]</sup>    | CVM-HF         | 2006 | 13 | 292   | all-cause mortality                                                         |
| Senni <sup>[23]</sup>    | 3C-HF          | 2013 | 11 | 2016  | all-cause mortality; urgent heart transplant (1year)                        |
| Vazquez <sup>[24]</sup>  | MUSIC          | 2009 | 10 | 992   | all-cause mortality; cardiac mortality; pump failure death, sudden death    |
| Nicole <sup>[25]</sup>   | BARDICHE-index | 2017 | 8  | 1811  | all-cause mortality; all-cause hospitalization; CHF-related hospitalization |

Table 2 The checklist for data collection

| Data collection                                                                             | Baseline            |                   | regular visit | withdraw /death |
|---------------------------------------------------------------------------------------------|---------------------|-------------------|---------------|-----------------|
|                                                                                             | Retrospective cases | Prospective cases |               |                 |
| Informed consent                                                                            | ✓                   | ✓                 |               |                 |
| Quantification verification (inclusion and exclusion)                                       | ✓                   | ✓                 |               |                 |
| Baseline evaluation                                                                         | ✓                   | ✓                 |               |                 |
| Medication                                                                                  | ✓                   | ✓                 |               |                 |
| Questionnaires<br>9-EHFScBS<br>SSRS<br>HAMD<br>HAMA<br>socioeconomic and educational status |                     | ✓                 |               |                 |
| Regular follow-up visit (every 3 months)                                                    |                     |                   | ✓             |                 |
| Survival state                                                                              | ✓                   |                   | ✓             | ✓               |
| Adverse event                                                                               |                     | Once happen       | ✓             |                 |
| Study bias                                                                                  |                     | Once happen       | ✓             |                 |
| Withdraw from the study                                                                     |                     | Once happen       | ✓             |                 |
| Death                                                                                       |                     | Once happen       | ✓             |                 |

Figure 1 Flow diagram of progress

1  
2  
3  
4  
5  
6  
7  
8  
9  
10  
11  
12  
13  
14

## Figure 2 Hazard ratio of variables in different risk models

NYHA, New York Heart Association; VHD, valvular heart disease; Af, atrial fibrillation; MI, myocardial infarction; CAGB, coronary artery bypass grafting; COPD, chronic obstructive pulmonary disease; DM, diabetes mellitus; ICM, ischemic cardiomyopathy; HR, heart rate; SBP, systolic blood pressure; BMI, body mass index; BNP, brain natriuretic peptide

## Figure 3 Study framework and process

### FOOTNOTES

**Acknowledgements** The authors thank Xiamen Cardiovascular Hospital, Xiamen University (Xiamen, China), Wuhan Asia Heart Hospital (Wuhan, China), Jiangning Hospital Affiliated to Nanjing Medical University, (Nanjing, China), The Second People's Hospital of Lianyungang (Lianyungang, China), The Affiliated Hospital of Jiangsu University (Zhenjiang, China), Taixing People's Hospital (Taixing, China), The First People's Hospital of Huaian (Huaian, China), The First People's Hospital of Yancheng (Yancheng, China), Rugao People's Hospital (Rugao, China), The First People's Hospital of Zhangjiagang (Zhangjiagang, China), The Third People's Hospital of Suzhou (Suzhou, China), The Third People's Hospital of Wuxi (Wuxi, China), The Second Affiliated Hospital of Nanjing Medical University (Nanjing, China) for collaboration including recruitment and follow-up of HF patients. The authors also thank the HF patients who participated in the survey of patient requirements during the design of this study.

**Contributors** JGZ and FQM conceived and designed the study. ZHZ, XFH, ZYQ, YW, YHC, YLW, YZ, ZC, XWZ, JY, JLZ, JHG, KBL, LC, RJZ, HJ participated in different phases of the protocol design. WHZ provide expertise in data processing and machine learning. SWT and YYW provided their expertise for traditional statistical analysis. JGZ obtained funding. FQM drafted the final manuscript. All authors have read the manuscript and provided feedback. JGZ approved the final version of the manuscript before submission. FQM took responsibility for the submission process.

**Funding** This study was supported mainly by Jiangsu Province's Key Medical Center (grant number: YXZXA2016010; PI: Jiangang Zou, MD, Ph.D.); in part by National Natural Science Foundation of China (grant number: 81470457; PI: Jiangang Zou, MD, Ph.D.) and Jiangsu Science and Technology Department (grant number: BE2016764; PI: Jiangang Zou, MD, Ph.D.). This research was also supported in part by an AHA grant (grant number: 17AIREA33700016; PI: Weihua Zhou, Ph.D.) and a New Faculty startup grant from the University of Southern Mississippi (grant number: DE01791; PI: Weihua Zhou, Ph.D.).

**Competing interests** We have read and understood BMJ policy on declaration of interests and declare that we have no competing interests.

**Ethics approval** This study has been approved by the Ethics Committee of The First Affiliated Hospital of Nanjing Medical University (2017-SR-06).

**Provenance and peer review** Not commissioned; externally peer reviewed.

**Data sharing statement** No additional data are available.

## Reference

- [1] Sato N. Epidemiology of Heart Failure in Asia[J]. *Heart Fail Clin*, 2015,11(4):573-579.
- [2] Mozaffarian D, Benjamin E J, Go A S, et al. Heart disease and stroke statistics--2015 update: a report from the American Heart Association[J]. *Circulation*, 2015,131(4):e29-e322.
- [3] Tomaselli G F, Zipes D P. What causes sudden death in heart failure?[J]. *Circ Res*, 2004,95(8):754-763.
- [4] Solomon S D, Wang D, Finn P, et al. Effect of candesartan on cause-specific mortality in heart failure patients: the Candesartan in Heart failure Assessment of Reduction in Mortality and morbidity (CHARM) program[J]. *Circulation*, 2004,110(15):2180-2183.
- [5] Yousuf O, Chrispin J, Tomaselli G F, et al. Clinical management and prevention of sudden cardiac death[J]. *Circ Res*, 2015,116(12):2020-2040.
- [6] Connolly S J, Hallstrom A P, Cappato R, et al. Meta-analysis of the implantable cardioverter defibrillator secondary prevention trials. AVID, CASH and CIDS studies. Antiarrhythmics vs Implantable Defibrillator study. Cardiac Arrest Study Hamburg . Canadian Implantable Defibrillator Study[J]. *Eur Heart J*, 2000,21(24):2071-2078.
- [7] Myerburg R J, Spooner P M. Opportunities for sudden death prevention: directions for new clinical and basic research[J]. *Cardiovasc Res*, 2001,50(2):177-185.
- [8] Ponikowski P, Voors A A, Anker S D, et al. 2016 ESC Guidelines for the diagnosis and treatment of

1  
2  
3 acute and chronic heart failure: The Task Force for the diagnosis and treatment of acute and chronic  
4 heart failure of the European Society of Cardiology (ESC) Developed with the special contribution of  
5 the Heart Failure Association (HFA) of the ESC[J]. *Eur Heart J*, 2016,37(27):2129-2200.

- 6  
7 [9] Kober L, Thune J J, Nielsen J C, et al. Defibrillator Implantation in Patients with Nonischemic  
8 Systolic Heart Failure[J]. *N Engl J Med*, 2016,375(13):1221-1230.
- 9  
10 [10] Myerburg R J, Spooner P M. Opportunities for sudden death prevention: directions for new clinical  
11 and basic research[J]. *Cardiovasc Res*, 2001,50(2):177-185.
- 12  
13 [11] Stecker E C, Vickers C, Waltz J, et al. Population-based analysis of sudden cardiac death with and  
14 without left ventricular systolic dysfunction: two-year findings from the Oregon Sudden Unexpected  
15 Death Study[J]. *J Am Coll Cardiol*, 2006,47(6):1161-1166.
- 16  
17 [12] Aimo A, Januzzi J J, Vergaro G, et al. Left ventricular ejection fraction for risk stratification in  
18 chronic systolic heart failure[J]. *Int J Cardiol*, 2018.
- 19  
20 [13] Shen L, Jhund P S, Petrie M C, et al. Declining Risk of Sudden Death in Heart Failure[J]. *N Engl J*  
21 *Med*, 2017,377(1):41-51.
- 22  
23 [14] Agostoni P, Corra U, Cattadori G, et al. Metabolic exercise test data combined with cardiac and  
24 kidney indexes, the MECKI score: a multiparametric approach to heart failure prognosis[J]. *Int J*  
25 *Cardiol*, 2013,167(6):2710-2718.
- 26  
27 [15] Barlera S, Tavazzi L, Franzosi M G, et al. Predictors of mortality in 6975 patients with chronic heart  
28 failure in the Gruppo Italiano per lo Studio della Streptochinasi nell'Infarto Miocardico-Heart Failure  
29 trial: proposal for a nomogram[J]. *Circ Heart Fail*, 2013,6(1):31-39.
- 30  
31 [16] Collier T J, Pocock S J, McMurray J J, et al. The impact of eplerenone at different levels of risk in  
32 patients with systolic heart failure and mild symptoms: insight from a novel risk score for prognosis  
33 derived from the EMPHASIS-HF trial[J]. *Eur Heart J*, 2013,34(36):2823-2829.
- 34  
35 [17] Komajda M, Carson P E, Hetzel S, et al. Factors associated with outcome in heart failure with  
36 preserved ejection fraction: findings from the Irbesartan in Heart Failure with Preserved Ejection  
37 Fraction Study (I-PRESERVE)[J]. *Circ Heart Fail*, 2011,4(1):27-35.
- 38  
39 [18] Levy W C, Mozaffarian D, Linker D T, et al. The Seattle Heart Failure Model: prediction of survival  
40 in heart failure[J]. *Circulation*, 2006,113(11):1424-1433.
- 41  
42 [19] O'Connor C M, Whellan D J, Wojdyla D, et al. Factors related to morbidity and mortality in patients  
43 with chronic heart failure with systolic dysfunction: the HF-ACTION predictive risk score model[J].  
44 *Circ Heart Fail*, 2012,5(1):63-71.
- 45  
46 [20] Pocock S J, Wang D, Pfeffer M A, et al. Predictors of mortality and morbidity in patients with chronic  
47 heart failure[J]. *Eur Heart J*, 2006,27(1):65-75.
- 48  
49 [21] Pocock S J, Ariti C A, McMurray J J, et al. Predicting survival in heart failure: a risk score based on  
50 39 372 patients from 30 studies[J]. *Eur Heart J*, 2013,34(19):1404-1413.
- 51  
52 [22] Senni M, Santilli G, Parrella P, et al. A novel prognostic index to determine the impact of cardiac  
53 conditions and co-morbidities on one-year outcome in patients with heart failure[J]. *Am J Cardiol*,  
54 2006,98(8):1076-1082.
- 55  
56 [23] Senni M, Parrella P, De Maria R, et al. Predicting heart failure outcome from cardiac and comorbid  
57 conditions: the 3C-HF score[J]. *Int J Cardiol*, 2013,163(2):206-211.
- 58  
59 [24] Vazquez R, Bayes-Genis A, Cygankiewicz I, et al. The MUSIC Risk score: a simple method for  
60

- 1  
2  
3 predicting mortality in ambulatory patients with chronic heart failure[J]. *Eur Heart J*,  
4 2009,30(9):1088-1096.  
5  
6 [25] Uszko-Lencer N, Frankenstein L, Spruit M A, et al. Predicting hospitalization and mortality in  
7 patients with heart failure: The BARDICHE-index[J]. *Int J Cardiol*, 2017,227:901-907.  
8  
9 [26] Delgado V, Bucciarelli-Ducci C, Bax J J. Diagnostic and prognostic roles of echocardiography and  
10 cardiac magnetic resonance[J]. *J Nucl Cardiol*, 2016,23(6):1399-1410.  
11  
12 [27] Halliday B P, Cleland J, Goldberger J J, et al. Personalizing Risk Stratification for Sudden Death in  
13 Dilated Cardiomyopathy: The Past, Present, and Future[J]. *Circulation*, 2017,136(2):215-231.  
14  
15 [28] Kelesidis I, Travin M I. Use of cardiac radionuclide imaging to identify patients at risk for arrhythmic  
16 sudden cardiac death[J]. *J Nucl Cardiol*, 2012,19(1):142-152, 153-157.  
17  
18 [29] Martins D S M, Vidigal F M, Morao M A. Iodine-123-metaiodobenzylguanidine scintigraphy in risk  
19 stratification of sudden death in heart failure[J]. *Rev Port Cardiol*, 2013,32(6):509-516.  
20  
21 [30] Aro A L, Reinier K, Rusinaru C, et al. Electrical risk score beyond the left ventricular ejection fraction:  
22 prediction of sudden cardiac death in the Oregon Sudden Unexpected Death Study and the  
23 Atherosclerosis Risk in Communities Study[J]. *Eur Heart J*, 2017,38(40):3017-3025.  
24  
25 [31] Quinlan J R. Induction of decision trees. *Machine learning 1.1*[M]. 1986.  
26  
27 [32] Weng S F, Reys J, Kai J, et al. Can machine-learning improve cardiovascular risk prediction using  
28 routine clinical data?[J]. *PLoS One*, 2017,12(4):e174944.  
29  
30 [33] Awan S E, Sohail F, Sanfilippo F M, et al. Machine learning in heart failure: ready for prime time[J].  
31 *Curr Opin Cardiol*, 2018,33(2):190-195.  
32  
33 [34] Jaarsma T, Arestedt K F, Martensson J, et al. The European Heart Failure Self-care Behaviour scale  
34 revised into a nine-item scale (EHFScB-9): a reliable and valid international instrument[J]. *Eur J*  
35 *Heart Fail*, 2009,11(1):99-105.  
36  
37 [35] Hu X, Hu X, Su Y, et al. The changes and factors associated with post-discharge self-care behaviors  
38 among Chinese patients with heart failure[J]. *Patient Prefer Adherence*, 2015,9:1593-1601.  
39  
40 [36] Yousuf O, Chrispin J, Tomaselli G F, et al. Clinical management and prevention of sudden cardiac  
41 death[J]. *Circ Res*, 2015,116(12):2020-2040.  
42  
43 [37] Harrell F J, Lee K L, Califf R M, et al. Regression modelling strategies for improved prognostic  
44 prediction[J]. *Stat Med*, 1984,3(2):143-152.  
45  
46  
47  
48  
49  
50  
51  
52  
53  
54  
55  
56  
57  
58  
59  
60

1  
2  
3  
4  
5  
6  
7  
8  
9  
10  
11  
12  
13  
14  
15  
16  
17  
18  
19  
20  
21  
22  
23  
24  
25  
26  
27  
28  
29  
30  
31  
32  
33  
34  
35  
36  
37  
38  
39  
40  
41  
42  
43  
44  
45  
46  
47  
48  
49  
50  
51  
52  
53  
54  
55  
56  
57  
58  
59  
60

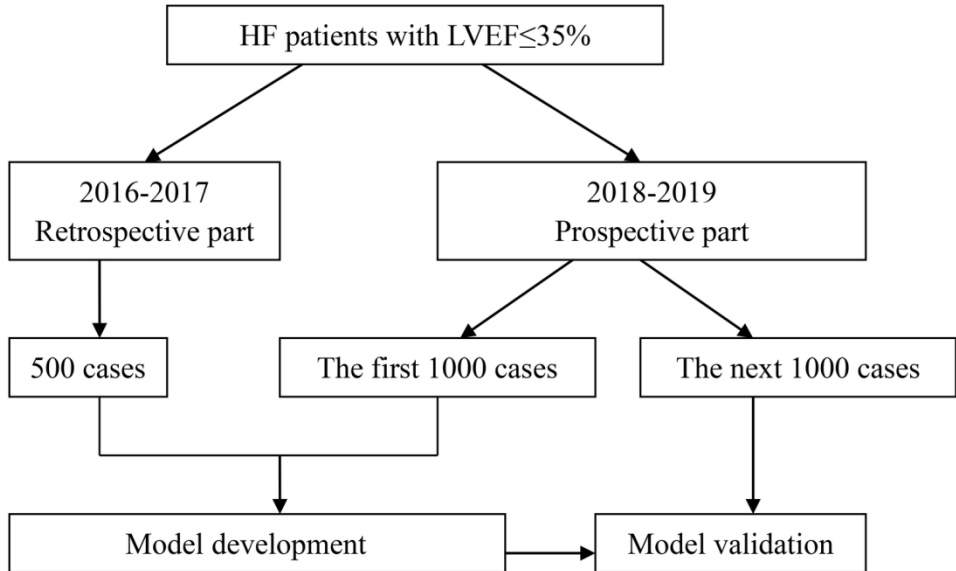

Figure 1 Flow diagram of progress

140x104mm (300 x 300 DPI)

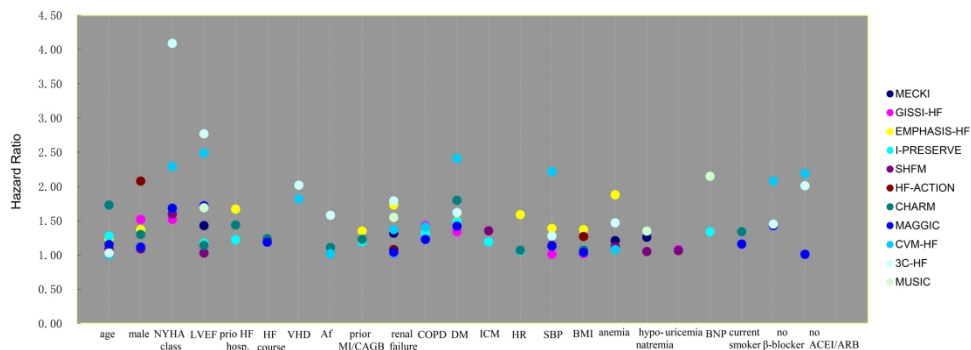

Figure 2 Hazard ratio of variables in different risk models  
 NYHA, New York Heart Association; VHD, valvular heart disease; Af, atrial fibrillation; MI, myocardial infarction; CAGB, coronary artery bypass grafting; COPD, chronic obstructive pulmonary disease; DM, diabetes mellitus; ICM, ischemic cardiomyopathy; HR, heart rate; SBP, systolic blood pressure; BMI, body mass index; BNP, brain natriuretic peptide

325x126mm (300 x 300 DPI)

1  
2  
3  
4  
5  
6  
7  
8  
9  
10  
11  
12  
13  
14  
15  
16  
17  
18  
19  
20  
21  
22  
23  
24  
25  
26  
27  
28  
29  
30  
31  
32  
33  
34  
35  
36  
37  
38  
39  
40  
41  
42  
43  
44  
45  
46  
47  
48  
49  
50  
51  
52  
53  
54  
55  
56  
57  
58  
59  
60

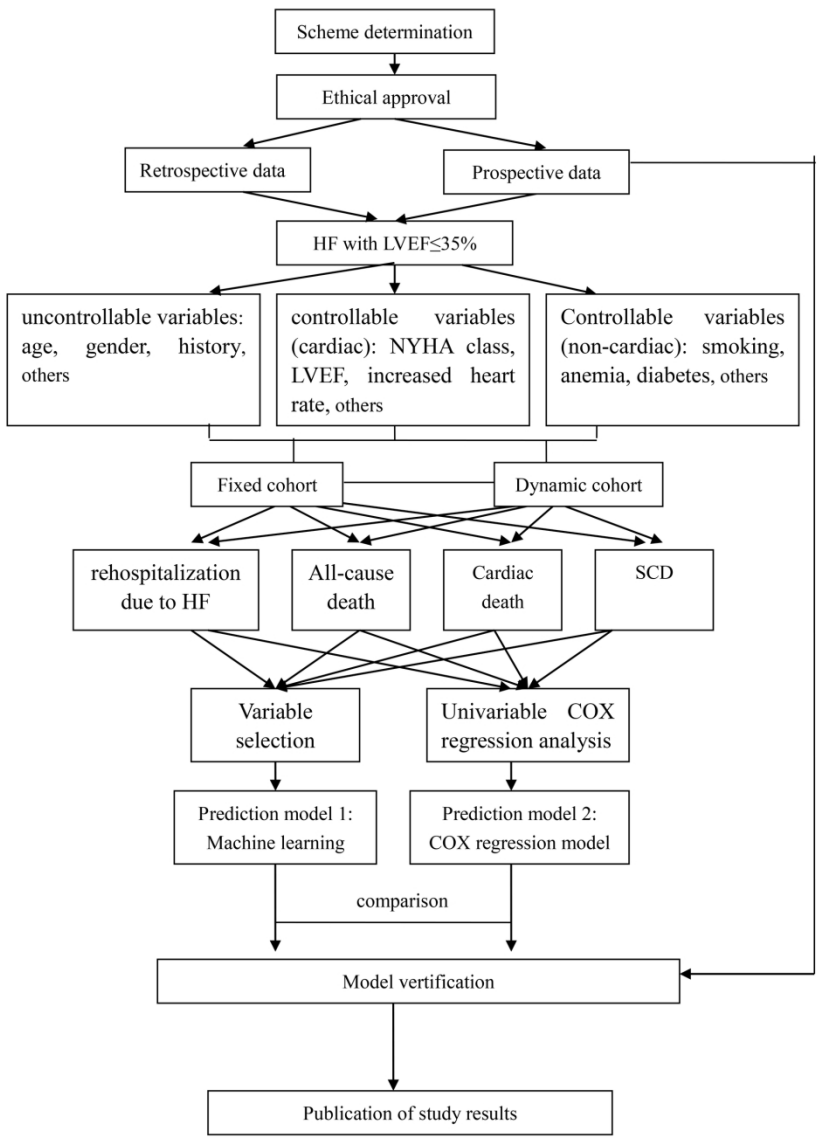

Figure 3 Study framework and process

158x226mm (300 x 300 DPI)



## List of Hospitals

The First Affiliated Hospital of Nanjing Medical University, Nanjing

Xiamen Cardiovascular Hospital, Xiamen University, Xiamen

Wuhan Asia Heart Hospital, Wuhan

Jiangning Hospital Affiliated to Nanjing Medical University, Nanjing

The Second People's Hospital of Lianyungang, Lianyungang

The Affiliated Hospital of Jiangsu University, Zhenjiang

Taixing People's Hospital, Taixing

The First People's Hospital of Huaian, Huaian

The First People's Hospital of Yancheng, Yancheng

Rugao People's Hospital, Rugao

The First People's Hospital of Zhangjiagang, Zhangjiagang

The Third People's Hospital of Suzhou, Suzhou

The Third People's Hospital of Wuxi, Wuxi

The Second Affiliated Hospital of Nanjing Medical University, Nanjing

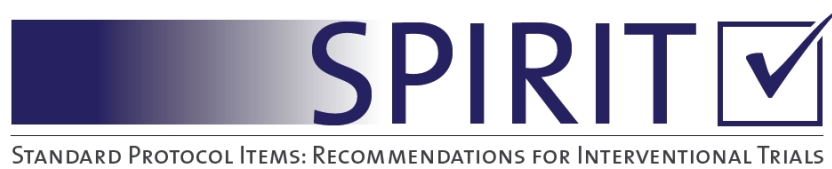

SPIRIT 2013 Checklist: Recommended items to address in a clinical trial protocol and related documents\*

| Section/item                      | Item No | Description                                                                                                                                                                                                                                                                                               |
|-----------------------------------|---------|-----------------------------------------------------------------------------------------------------------------------------------------------------------------------------------------------------------------------------------------------------------------------------------------------------------|
| <b>Administrative information</b> |         |                                                                                                                                                                                                                                                                                                           |
| Title                             | 1       | Descriptive title identifying the study design, population, interventions, and, if applicable, trial acronym <b>(P1)</b>                                                                                                                                                                                  |
| Trial registration                | 2a      | Trial identifier and registry name. If not yet registered, name of intended registry <b>(P7)</b>                                                                                                                                                                                                          |
|                                   | 2b      | All items from the World Health Organization Trial Registration Data Set <b>(P7)</b>                                                                                                                                                                                                                      |
| Protocol version                  | 3       | Date and version identifier                                                                                                                                                                                                                                                                               |
| Funding                           | 4       | Sources and types of financial, material, and other support <b>(P17-18)</b>                                                                                                                                                                                                                               |
| Roles and responsibilities        | 5a      | Names, affiliations, and roles of protocol contributors <b>(P1, P17)</b>                                                                                                                                                                                                                                  |
|                                   | 5b      | Name and contact information for the trial sponsor <b>(P1, P7)</b>                                                                                                                                                                                                                                        |
|                                   | 5c      | Role of study sponsor and funders, if any, in study design; collection, management, analysis, and interpretation of data; writing of the report; and the decision to submit the report for publication, including whether they will have ultimate authority over any of these activities <b>(P7, P17)</b> |
|                                   | 5d      | Composition, roles, and responsibilities of the coordinating centre, steering committee, endpoint adjudication committee, data management team, and other individuals or groups overseeing the trial, if applicable (see Item 21a for data monitoring committee) <b>(P7, P11-12)</b>                      |
| <b>Introduction</b>               |         |                                                                                                                                                                                                                                                                                                           |
| Background and rationale          | 6a      | Description of research question and justification for undertaking the trial, including summary of relevant studies (published and unpublished) examining benefits and harms for each intervention <b>(P4-6)</b>                                                                                          |
|                                   | 6b      | Explanation for choice of comparators <b>(P5-6)</b>                                                                                                                                                                                                                                                       |
| Objectives                        | 7       | Specific objectives or hypotheses <b>(P6)</b>                                                                                                                                                                                                                                                             |

1  
2  
3  
4  
5  
6  
7  
8  
9  
10  
11  
12  
13  
14  
15  
16  
17  
18  
19  
20  
21  
22  
23  
24  
25  
26  
27  
28  
29  
30  
31  
32  
33  
34  
35  
36  
37  
38  
39  
40  
41  
42  
43  
44  
45  
46  
47  
48  
49  
50  
51  
52  
53  
54  
55  
56  
57  
58  
59  
60

|              |   |                                                                                                                                                                                                                         |
|--------------|---|-------------------------------------------------------------------------------------------------------------------------------------------------------------------------------------------------------------------------|
| Trial design | 8 | Description of trial design including type of trial (eg, parallel group, crossover, factorial, single group), allocation ratio, and framework (eg, superiority, equivalence, noninferiority, exploratory) <b>(P6-7)</b> |
|--------------|---|-------------------------------------------------------------------------------------------------------------------------------------------------------------------------------------------------------------------------|

### Methods: Participants, interventions, and outcomes

|                      |     |                                                                                                                                                                                                                                                                                                                                                                                            |
|----------------------|-----|--------------------------------------------------------------------------------------------------------------------------------------------------------------------------------------------------------------------------------------------------------------------------------------------------------------------------------------------------------------------------------------------|
| Study setting        | 9   | Description of study settings (eg, community clinic, academic hospital) and list of countries where data will be collected. Reference to where list of study sites can be obtained <b>(P6-7)</b>                                                                                                                                                                                           |
| Eligibility criteria | 10  | Inclusion and exclusion criteria for participants. If applicable, eligibility criteria for study centres and individuals who will perform the interventions (eg, surgeons, psychotherapists) <b>(P7-8)</b>                                                                                                                                                                                 |
| Interventions        | 11a | Interventions for each group with sufficient detail to allow replication, including how and when they will be administered <b>(Not applicable)</b>                                                                                                                                                                                                                                         |
|                      | 11b | Criteria for discontinuing or modifying allocated interventions for a given trial participant (eg, drug dose change in response to harms, participant request, or improving/worsening disease) <b>(Not applicable)</b>                                                                                                                                                                     |
|                      | 11c | Strategies to improve adherence to intervention protocols, and any procedures for monitoring adherence (eg, drug tablet return, laboratory tests) <b>(Not applicable)</b>                                                                                                                                                                                                                  |
|                      | 11d | Relevant concomitant care and interventions that are permitted or prohibited during the trial <b>(Not applicable)</b>                                                                                                                                                                                                                                                                      |
| Outcomes             | 12  | Primary, secondary, and other outcomes, including the specific measurement variable (eg, systolic blood pressure), analysis metric (eg, change from baseline, final value, time to event), method of aggregation (eg, median, proportion), and time point for each outcome. Explanation of the clinical relevance of chosen efficacy and harm outcomes is strongly recommended <b>(P8)</b> |
| Participant timeline | 13  | Time schedule of enrolment, interventions (including any run-ins and washouts), assessments, and visits for participants. A schematic diagram is highly recommended <b>(see Figure1)</b>                                                                                                                                                                                                   |
| Sample size          | 14  | Estimated number of participants needed to achieve study objectives and how it was determined, including clinical and statistical assumptions supporting any sample size calculations <b>(P7)</b>                                                                                                                                                                                          |
| Recruitment          | 15  | Strategies for achieving adequate participant enrolment to reach target sample size <b>(P8)</b>                                                                                                                                                                                                                                                                                            |

### Methods: Assignment of interventions (for controlled trials)

Allocation:

|    |                |     |                                                                           |
|----|----------------|-----|---------------------------------------------------------------------------|
| 1  |                |     |                                                                           |
| 2  | Sequence       | 16a | Method of generating the allocation sequence (eg, computer-               |
| 3  | generation     |     | generated random numbers), and list of any factors for stratification.    |
| 4  |                |     | To reduce predictability of a random sequence, details of any planned     |
| 5  |                |     | restriction (eg, blocking) should be provided in a separate document      |
| 6  |                |     | that is unavailable to those who enrol participants or assign             |
| 7  |                |     | interventions <b>(Not applicable)</b>                                     |
| 8  |                |     |                                                                           |
| 9  |                |     |                                                                           |
| 10 | Allocation     | 16b | Mechanism of implementing the allocation sequence (eg, central            |
| 11 | concealment    |     | telephone; sequentially numbered, opaque, sealed envelopes),              |
| 12 | mechanism      |     | describing any steps to conceal the sequence until interventions are      |
| 13 |                |     | assigned <b>(Not applicable)</b>                                          |
| 14 |                |     |                                                                           |
| 15 | Implementation | 16c | Who will generate the allocation sequence, who will enrol participants,   |
| 16 |                |     | and who will assign participants to interventions <b>(Not applicable)</b> |
| 17 |                |     |                                                                           |
| 18 |                |     |                                                                           |
| 19 | Blinding       | 17a | Who will be blinded after assignment to interventions (eg, trial          |
| 20 | (masking)      |     | participants, care providers, outcome assessors, data analysts), and      |
| 21 |                |     | how <b>(Not applicable)</b>                                               |
| 22 |                |     |                                                                           |
| 23 |                | 17b | If blinded, circumstances under which unblinding is permissible, and      |
| 24 |                |     | procedure for revealing a participant's allocated intervention during     |
| 25 |                |     | the trial <b>(Not applicable)</b>                                         |
| 26 |                |     |                                                                           |
| 27 |                |     |                                                                           |

### Methods: Data collection, management, and analysis

|    |                 |     |                                                                            |
|----|-----------------|-----|----------------------------------------------------------------------------|
| 28 |                 |     |                                                                            |
| 29 |                 |     |                                                                            |
| 30 | Data collection | 18a | Plans for assessment and collection of outcome, baseline, and other        |
| 31 | methods         |     | trial data, including any related processes to promote data quality (eg,   |
| 32 |                 |     | duplicate measurements, training of assessors) and a description of        |
| 33 |                 |     | study instruments (eg, questionnaires, laboratory tests) along with        |
| 34 |                 |     | their reliability and validity, if known. Reference to where data          |
| 35 |                 |     | collection forms can be found, if not in the protocol <b>(P8-12)</b>       |
| 36 |                 |     |                                                                            |
| 37 |                 |     |                                                                            |
| 38 |                 | 18b | Plans to promote participant retention and complete follow-up,             |
| 39 |                 |     | including list of any outcome data to be collected for participants who    |
| 40 |                 |     | discontinue or deviate from intervention protocols <b>(P11)</b>            |
| 41 |                 |     |                                                                            |
| 42 | Data            | 19  | Plans for data entry, coding, security, and storage, including any         |
| 43 | management      |     | related processes to promote data quality (eg, double data entry;          |
| 44 |                 |     | range checks for data values). Reference to where details of data          |
| 45 |                 |     | management procedures can be found, if not in the protocol <b>(P11-12)</b> |
| 46 |                 |     |                                                                            |
| 47 |                 |     |                                                                            |
| 48 | Statistical     | 20a | Statistical methods for analysing primary and secondary outcomes.          |
| 49 | methods         |     | Reference to where other details of the statistical analysis plan can be   |
| 50 |                 |     | found, if not in the protocol <b>(P12-P14)</b>                             |
| 51 |                 |     |                                                                            |
| 52 |                 | 20b | Methods for any additional analyses (eg, subgroup and adjusted             |
| 53 |                 |     | analyses) <b>(Not applicable)</b>                                          |
| 54 |                 |     |                                                                            |
| 55 |                 | 20c | Definition of analysis population relating to protocol non-adherence       |
| 56 |                 |     | (eg, as randomised analysis), and any statistical methods to handle        |
| 57 |                 |     | missing data (eg, multiple imputation) <b>(Not applicable)</b>             |
| 58 |                 |     |                                                                            |
| 59 |                 |     |                                                                            |
| 60 |                 |     |                                                                            |

## Methods: Monitoring

|                 |     |                                                                                                                                                                                                                                                                                                                                       |
|-----------------|-----|---------------------------------------------------------------------------------------------------------------------------------------------------------------------------------------------------------------------------------------------------------------------------------------------------------------------------------------|
| Data monitoring | 21a | Composition of data monitoring committee (DMC); summary of its role and reporting structure; statement of whether it is independent from the sponsor and competing interests; and reference to where further details about its charter can be found, if not in the protocol. Alternatively, an explanation of why a DMC is not needed |
|                 | 21b | Description of any interim analyses and stopping guidelines, including who will have access to these interim results and make the final decision to terminate the trial                                                                                                                                                               |
| Harms           | 22  | Plans for collecting, assessing, reporting, and managing solicited and spontaneously reported adverse events and other unintended effects of trial interventions or trial conduct <b>(P11-12)</b>                                                                                                                                     |
| Auditing        | 23  | Frequency and procedures for auditing trial conduct, if any, and whether the process will be independent from investigators and the sponsor                                                                                                                                                                                           |

## Ethics and dissemination

|                               |     |                                                                                                                                                                                                                                                          |
|-------------------------------|-----|----------------------------------------------------------------------------------------------------------------------------------------------------------------------------------------------------------------------------------------------------------|
| Research ethics approval      | 24  | Plans for seeking research ethics committee/institutional review board (REC/IRB) approval <b>(P14)</b>                                                                                                                                                   |
| Protocol amendments           | 25  | Plans for communicating important protocol modifications (eg, changes to eligibility criteria, outcomes, analyses) to relevant parties (eg, investigators, REC/IRBs, trial participants, trial registries, journals, regulators) <b>(Not applicable)</b> |
| Consent or assent             | 26a | Who will obtain informed consent or assent from potential trial participants or authorised surrogates, and how (see Item 32) <b>(P8)</b>                                                                                                                 |
|                               | 26b | Additional consent provisions for collection and use of participant data and biological specimens in ancillary studies, if applicable <b>(Not applicable)</b>                                                                                            |
| Confidentiality               | 27  | How personal information about potential and enrolled participants will be collected, shared, and maintained in order to protect confidentiality before, during, and after the trial <b>(P11-12)</b>                                                     |
| Declaration of interests      | 28  | Financial and other competing interests for principal investigators for the overall trial and each study site <b>(P18)</b>                                                                                                                               |
| Access to data                | 29  | Statement of who will have access to the final trial dataset, and disclosure of contractual agreements that limit such access for investigators <b>(P11-12)</b>                                                                                          |
| Ancillary and post-trial care | 30  | Provisions, if any, for ancillary and post-trial care, and for compensation to those who suffer harm from trial participation <b>(Not applicable)</b>                                                                                                    |

- 1  
2  
3  
4  
5  
6  
7  
8  
9  
10  
11  
12  
13  
14  
15
- |                         |     |                                                                                                                                                                                                                                                                                                  |
|-------------------------|-----|--------------------------------------------------------------------------------------------------------------------------------------------------------------------------------------------------------------------------------------------------------------------------------------------------|
| Dissemination<br>policy | 31a | Plans for investigators and sponsor to communicate trial results to participants, healthcare professionals, the public, and other relevant groups (eg, via publication, reporting in results databases, or other data sharing arrangements), including any publication restrictions <b>(P14)</b> |
|                         | 31b | Authorship eligibility guidelines and any intended use of professional writers <b>(Not applicable)</b>                                                                                                                                                                                           |
|                         | 31c | Plans, if any, for granting public access to the full protocol, participant-level dataset, and statistical code <b>(Not applicable)</b>                                                                                                                                                          |

## 16 Appendices

- 17  
18  
19  
20  
21  
22  
23  
24
- |                               |    |                                                                                                                                                                                                                        |
|-------------------------------|----|------------------------------------------------------------------------------------------------------------------------------------------------------------------------------------------------------------------------|
| Informed consent<br>materials | 32 | Model consent form and other related documentation given to participants and authorised surrogates <b>(see ICF)</b>                                                                                                    |
| Biological<br>specimens       | 33 | Plans for collection, laboratory evaluation, and storage of biological specimens for genetic or molecular analysis in the current trial and for future use in ancillary studies, if applicable <b>(Not applicable)</b> |

---

25 \*It is strongly recommended that this checklist be read in conjunction with the SPIRIT 2013  
26 Explanation & Elaboration for important clarification on the items. Amendments to the  
27 protocol should be tracked and dated. The SPIRIT checklist is copyrighted by the SPIRIT  
28 Group under the Creative Commons "[Attribution-NonCommercial-NoDerivs 3.0 Unported](https://creativecommons.org/licenses/by-nc-nd/3.0/)"  
29 license.  
30  
31  
32  
33  
34  
35  
36  
37  
38  
39  
40  
41  
42  
43  
44  
45  
46  
47  
48  
49  
50  
51  
52  
53  
54  
55  
56  
57  
58  
59  
60

# BMJ Open

## Machine learning for prediction of sudden cardiac death in heart failure patients with low left ventricular ejection fraction: study protocol for a retro-prospective multicenter registry in China

|                               |                                                                                                                                                                                                                                                                                                                                                                                                                                                                                                                                                                                                                                                                                                                                                                                                                                                                                                                                                                                                                                                                                                                                                                                                                                                                                                                                                                                                                                                                                                                                                                                                                                                                                                                                                                                                                                                                                                                                                                                                                                                                                                                                                                                       |
|-------------------------------|---------------------------------------------------------------------------------------------------------------------------------------------------------------------------------------------------------------------------------------------------------------------------------------------------------------------------------------------------------------------------------------------------------------------------------------------------------------------------------------------------------------------------------------------------------------------------------------------------------------------------------------------------------------------------------------------------------------------------------------------------------------------------------------------------------------------------------------------------------------------------------------------------------------------------------------------------------------------------------------------------------------------------------------------------------------------------------------------------------------------------------------------------------------------------------------------------------------------------------------------------------------------------------------------------------------------------------------------------------------------------------------------------------------------------------------------------------------------------------------------------------------------------------------------------------------------------------------------------------------------------------------------------------------------------------------------------------------------------------------------------------------------------------------------------------------------------------------------------------------------------------------------------------------------------------------------------------------------------------------------------------------------------------------------------------------------------------------------------------------------------------------------------------------------------------------|
| Journal:                      | <i>BMJ Open</i>                                                                                                                                                                                                                                                                                                                                                                                                                                                                                                                                                                                                                                                                                                                                                                                                                                                                                                                                                                                                                                                                                                                                                                                                                                                                                                                                                                                                                                                                                                                                                                                                                                                                                                                                                                                                                                                                                                                                                                                                                                                                                                                                                                       |
| Manuscript ID                 | bmjopen-2018-023724.R2                                                                                                                                                                                                                                                                                                                                                                                                                                                                                                                                                                                                                                                                                                                                                                                                                                                                                                                                                                                                                                                                                                                                                                                                                                                                                                                                                                                                                                                                                                                                                                                                                                                                                                                                                                                                                                                                                                                                                                                                                                                                                                                                                                |
| Article Type:                 | Protocol                                                                                                                                                                                                                                                                                                                                                                                                                                                                                                                                                                                                                                                                                                                                                                                                                                                                                                                                                                                                                                                                                                                                                                                                                                                                                                                                                                                                                                                                                                                                                                                                                                                                                                                                                                                                                                                                                                                                                                                                                                                                                                                                                                              |
| Date Submitted by the Author: | 04-Feb-2019                                                                                                                                                                                                                                                                                                                                                                                                                                                                                                                                                                                                                                                                                                                                                                                                                                                                                                                                                                                                                                                                                                                                                                                                                                                                                                                                                                                                                                                                                                                                                                                                                                                                                                                                                                                                                                                                                                                                                                                                                                                                                                                                                                           |
| Complete List of Authors:     | <p>Meng, Fanqi; The First Affiliated Hospital of Nanjing Medical University, Department of Cardiology; Xiamen Cardiovascular Hospital, Xiamen University, Department of Cardiology</p> <p>Zhang, Zhihua; The First Affiliated Hospital of Nanjing Medical University,, Department of Cardiology; Jiangning Hospital Affiliated to Nanjing Medical University, Department of Cardiology</p> <p>Hou, Xiaofeng; The First Affiliated Hospital of Nanjing Medical University, Department of Cardiology</p> <p>Qian, Zhiyong; The First Affiliated Hospital of Nanjing Medical University, Department of Cardiology</p> <p>Wang, Yao; The First Affiliated Hospital of Nanjing Medical University, Department of Cardiology</p> <p>Chen, Yanhong; Wuhan Asia Heart Hospital, Department of Cardiology</p> <p>Wang, Yilian; The Second People's Hospital of Lianyungang, Department of Cardiology,</p> <p>Zhou, Ye; The Affiliated Hospital of Jiangsu University, Department of Cardiology</p> <p>Chen, Zhen; Taixing People's Hospital, Department of Cardiology</p> <p>Zhang, Xiwen; The First People's Hospital of Huaian, Department of Cardiology</p> <p>Yang, Jing; The First People's Hospital of Huaian, Department of Cardiology</p> <p>Zhang, Jinlong; The First People's Hospital of Yancheng, Department of Cardiology</p> <p>Guo, Jianghong; Rugao People's Hospital, Department of Cardiology</p> <p>Li, Kebei; The First People's Hospital of Zhangjiagang, Department of Cardiology</p> <p>Chen, Lu; The Third People's Hospital of Suzhou, Department of Cardiology</p> <p>Zhuang, Ruijuan; The Third People's Hospital of Wuxi, Department of Cardiology</p> <p>Jiang, Hai; The Second Affiliated Hospital of Nanjing Medical University, Department of Cardiology</p> <p>Zhou, Weihua; University of Southern Mississippi, School of Computing</p> <p>Tang, Shaowen; Nanjing Medical University, Department of Epidemiology</p> <p>Wei, Yongyue; Nanjing Medical University, Department of Biostatistics</p> <p>Zou, Jiangang; the First Affiliated Hospital of Nanjing Medical University, Department of Cardiology; Nanjing Medical University, Key Laboratory of</p> |

1  
2  
3  
4  
5  
6  
7  
8  
9  
10  
11  
12  
13  
14  
15  
16  
17  
18  
19  
20  
21  
22  
23  
24  
25  
26  
27  
28  
29  
30  
31  
32  
33  
34  
35  
36  
37  
38  
39  
40  
41  
42  
43  
44  
45  
46  
47  
48  
49  
50  
51  
52  
53  
54  
55  
56  
57  
58  
59  
60

|                                  |                                                                                                                                    |
|----------------------------------|------------------------------------------------------------------------------------------------------------------------------------|
|                                  | Targeted Intervention of Cardiovascular Disease, Collaborative Innovation Center for Cardiovascular Disease Translational Medicine |
| <b>Primary Subject Heading</b> : | Medical management                                                                                                                 |
| Secondary Subject Heading:       | Cardiovascular medicine                                                                                                            |
| Keywords:                        | Heart failure < CARDIOLOGY, sudden cardiac death, machine learning, risk model                                                     |
|                                  |                                                                                                                                    |

SCHOLARONE™  
Manuscripts



1  
2  
3  
4 **Machine learning for prediction of sudden cardiac death in heart**  
5  
6 **failure patients with low left ventricular ejection fraction: study**  
7  
8  
9 **protocol for a retro-prospective multicenter registry in China**  
10

11 Fanqi Meng,<sup>1,2</sup> Zihua Zhang,<sup>1,3</sup> Xiaofeng Hou,<sup>1</sup> Zhiyong Qian,<sup>1</sup> Yao Wang,<sup>1</sup> Yanhong Chen,<sup>4</sup>  
12 Yilian Wang,<sup>5</sup> Ye Zhou,<sup>6</sup> Zhen Chen,<sup>7</sup> Xiwen Zhang,<sup>8</sup> Jing Yang,<sup>8</sup> Jinlong Zhang,<sup>9</sup> Jianghong  
13 Guo,<sup>10</sup> Kebei Li,<sup>11</sup> Lu Chen,<sup>12</sup> Ruijuan Zhuang,<sup>13</sup> Hai Jiang,<sup>14</sup> Weihua Zhou,<sup>15</sup> Shaowen Tang,<sup>16</sup>  
14 Yongyue Wei,<sup>17</sup> Jiangang Zou<sup>1,18\*</sup>  
15

16 **Author affiliations**

17 <sup>1</sup>Department of Cardiology, The First Affiliated Hospital of Nanjing Medical University, Nanjing,  
18 China  
19

20 <sup>2</sup>Department of Cardiology, Xiamen Cardiovascular Hospital, Xiamen University, Xiamen, China  
21

22 <sup>3</sup>Department of Cardiology, Jiangning Hospital Affiliated to Nanjing Medical University, Nanjing,  
23 China  
24

25 <sup>4</sup>Department of Cardiology, Wuhan Asia Heart Hospital, Wuhan, China  
26

27 <sup>5</sup>Department of Cardiology, The Second People's Hospital of Lianyungang, Lianyungang, China  
28

29 <sup>6</sup>Department of Cardiology, The Affiliated Hospital of Jiangsu University, Zhenjiang, China  
30

31 <sup>7</sup>Department of Cardiology, Taixing People's Hospital, Taixing, China  
32

33 <sup>8</sup>Department of Cardiology, The First People's Hospital of Huaian, Huaian, China  
34

35 <sup>9</sup>Department of Cardiology, The First People's Hospital of Yancheng, Yancheng, China  
36

37 <sup>10</sup>Department of Cardiology, Rugao People's Hospital, Rugao, China  
38

39 <sup>11</sup>Department of Cardiology, The First People's Hospital of Zhangjiagang, Zhangjiagang, China  
40

41 <sup>12</sup>Department of Cardiology, The Third People's Hospital of Suzhou, Suzhou, China  
42

43 <sup>13</sup>Department of Cardiology, The Third People's Hospital of Wuxi, Wuxi, China  
44

45 <sup>14</sup>Department of Cardiology, The Second Affiliated Hospital of Nanjing Medical University, Nanjing,  
46 China  
47

48 <sup>15</sup>School of Computing, University of Southern Mississippi, Hattiesburg, USA.  
49

50 <sup>16</sup>Department of Epidemiology, Nanjing Medical University, Nanjing, China  
51

52 <sup>17</sup>Department of Biostatistics, Nanjing Medical University, Nanjing, China  
53

54 <sup>18</sup>Key Laboratory of Targeted Intervention of Cardiovascular Disease, Collaborative Innovation Center  
55 for Cardiovascular Disease Translational Medicine, Nanjing Medical University, China  
56

57 **\*Correspondence to**

58 Dr Jiangang Zou: Department of Cardiology, the First Affiliated Hospital of Nanjing Medical  
59 University, 300 Guangzhou Road, Nanjing, 210029, P.R.China; E-mail: [jgzou@njmu.edu.cn](mailto:jgzou@njmu.edu.cn); Tel.  
60 phone: +86 13605191407

**Keywords:** heart failure, sudden cardiac death, machine learning, risk model

## ABSTRACT

### Introduction

Left ventricular ejection fraction (LVEF)  $\leq 35\%$ , as current significant implantable cardioverter-defibrillator (ICD) indication for primary prevention of sudden cardiac death (SCD) in heart failure (HF) patients, has been widely recognized to be inefficient. Improvement of patient selection for low LVEF ( $\leq 35\%$ ) is needed to optimize deployment of ICD. Most of the existing prediction models are not appropriate to identify ICD candidates at high risk of SCD in HF patients with low LVEF. Compared to traditional statistical analysis, machine learning (ML) can employ computer algorithms to identify patterns in large datasets, analyze rules automatically and build both linear and non-linear models in order to make data-driven predictions. This study is aimed to develop and validate new models using ML to improve the prediction of SCD in HF patients with low LVEF.

### Methods and analysis

We will conduct a retro-prospective, multi-center, observational registry of Chinese HF patients with low LVEF. The HF patients with LVEF  $\leq 35\%$  after optimized medication at least 3 months will be enrolled in this study. The primary endpoints are all-cause death and SCD. The secondary endpoints are malignant arrhythmia, sudden cardiac arrest, cardiopulmonary resuscitation and rehospitalization due to HF. The baseline demographic, clinical, biological, electrophysiological, social and psychological variables will be collected. Both ML and traditional multivariable COX proportional hazards regression models will be developed and compared in the prediction of SCD. Moreover, the ML model will be validated in a prospective study.

### Ethics and dissemination

The study protocol has been approved by the Ethics Committee of the First Affiliated Hospital of Nanjing Medical University (2017-SR-06). All results of this study will be published in international peer-reviewed journals and presented at relevant conferences.

**Clinical trial registration** ChiCTR-POC-17011842.

### Strengths and limitations of this study

- This study is the first multicenter registry study in China, aimed to investigate the feasibility and accuracy of applying ML to predict SCD in HF patients with low LVEF.
- A broad range of outcomes, including SCD, all-cause death, lethal arrhythmia, sudden cardiac arrest, cardiopulmonary resuscitation and rehospitalization due to HF, will be evaluated in this study, and the corresponding prognostic models will be developed.
- Machine learning and the traditional multivariable COX proportional hazards regression model will be derived from the same database and be compared.
- HF patients with LVEF>35% will not be included based on the design of this study, which will restrict the application of the results of this study to the HF with low LVEF,
- It might be difficult to determine the endpoint of this study sometimes for some patients, when dealing with SCD, lethal arrhythmia and sudden cardiac arrest, especially when outside the hospital.

## INTRODUCTION

Heart failure (HF), has become a major public health problem with increased prevalence in both Asia and Western countries. The prevalence of HF in Asia is 1.2%-6.7% depending on the population studied.<sup>[1]</sup> In China, there are 4.2 million HF patients, and 500,000 new cases are being diagnosed each year.<sup>[1]</sup> Although the survival rate after HF diagnosis has been increased due to improvement in medical therapy, the mortality of HF remains high. Around 50% of people diagnosed with HF will die within 5 years.<sup>[2]</sup> The two most common causes of death in patients with HF are sudden cardiac death (SCD) and progressive pump failure. SCD in HF patients is usually caused by lethal arrhythmias such as ventricular tachycardia or ventricular fibrillation, and is reported to be responsible for nearly 50% of all cardiovascular death in HF patients.<sup>[3, 4]</sup>

The most effective strategy for prevention of SCD in patients with HF is the implantable cardioverter-defibrillator (ICD), associated with 54% relative risk reduction in primary prevention<sup>[5]</sup>, and 50% relative risk reduction in arrhythmia-related death in secondary prevention.<sup>[6]</sup> There is a higher risk of SCD in patients with LVEF $\leq$  35% than with LVEF $>$ 35%.<sup>[7]</sup> At present, left ventricular ejection fraction (LVEF)  $\leq$ 35% is the major ICD indication for primary prevention of SCD.<sup>[8]</sup> However, real-world data show that only 3% to 5% of ICD patients for primary prevention with LVEF $\leq$ 35% receive shock therapies on an annual basis,<sup>[9]</sup> whereas some SCD victims have LVEF $>$ 35%.<sup>[10, 11]</sup> Identifying the patients who will be most likely to benefit from primary prevention ICD, is urgently needed. Based on the latest literature, LVEF $\leq$ 35% is still an independent predictor of all-cause and cardiovascular mortality in chronic systolic HF, and displays a better combination of sensitivity and specificity than 40% cut-off.<sup>[12]</sup> Finding ways to evaluate the SCD risk in patients with lower EF will be more efficient and economically significant. Furthermore, a noticeable decline in the rate of SCD for HF patients with reduced LVEF has been observed, which was consistent with the cumulative benefit of optimizing medication including angiotensin converting enzyme inhibitor (ACEI) or angiotensin receptor blocker (ARB), beta-blocker, and mineralocorticoid receptor

1  
2  
3  
4 antagonist (MRAs).<sup>[13]</sup> Therefore, it is imperative to update the criterion for ICD  
5  
6 implantation

7  
8 Over the last decade, lots of multivariate prognostic models derived for chronic HF  
9  
10 patients have been proposed (Table 1).<sup>[14-25]</sup> However, these models are not  
11  
12 appropriate to identify ICD candidates at high risk of SCD in HF patients with low  
13  
14 LVEF. Most above prognostic scores were developed from trial databases, and the  
15  
16 subjects included various types of heart failure. There is no specific study for the  
17  
18 prognosis of low LVEF population. Additionally, although all the scores are “not  
19  
20 parsimonious”, some critical factors are not incorporated into the prognostic models,  
21  
22 for example, medications are contained in I-PRESERVE<sup>[17]</sup>, MAGGIC<sup>[21]</sup> and  
23  
24 3C-HF<sup>[23]</sup>. Optimized medication was not required as inclusion criteria in all 12  
25  
26 studies. Furthermore, the most above prognostic models are not able to predict SCD  
27  
28 risk. In recent years, the advances in strain echocardiography<sup>[26, 27]</sup>, cardiac magnetic  
29  
30 resonance<sup>[26, 27]</sup> and cardiac radionuclide imaging<sup>[28, 29]</sup> have provided essential  
31  
32 insights into the mechanisms of ventricular arrhythmias, and have been recommended  
33  
34 to predict the SCD in patients with HF. Although these new methods are effective and  
35  
36 noninvasive, the widespread use in large HF population to predict SCD is difficult,  
37  
38 due to high equipment and technical requirements. Resting 12-lead ECG and Holter,  
39  
40 as the longest surviving, broadly available, quickly deployed and inexpensive tests,  
41  
42 can provide a measure of cumulative electrical risk, which may be combined with  
43  
44 other factors to improve the SCD risk prediction.<sup>[30]</sup>

45  
46 Based on above reasons, the novel risk assessment tools should meet the following  
47  
48 requirements: (1) the risk model should be developed from the population with low  
49  
50 LVEF ( $\leq 35\%$ ) to accelerate its clinical application and promote the accuracy of ICD  
51  
52 indications for primary prevention. (2) More cardiac and non-cardiac factors beyond  
53  
54 LVEF should be included. (3) Electrical risk factors should be included as candidate  
55  
56 predictors to evaluate the risk of sudden arrhythmic death. (4) Although sometimes it  
57  
58 is not easy to determine the cause of death, SCD as the primary endpoint should be  
59  
60 defined whenever possible.

Data processing is the crucial step to develop the prognostic models. This study

1  
2  
3 involves non-linear prediction models, a large number of patients and numerous  
4 predictors with complicated correlations. Traditional hypothesis-driven statistical  
5 analysis is difficult to overcome these challenges. The machine learning (ML)  
6 approaches have great potential to improve the solution. They employ computer  
7 algorithms to identify patterns in large datasets with a large number of variables,  
8 analyze rules automatically and build both linear and non-linear models in order to  
9 make data-driven predictions or decisions.<sup>[31]</sup> Weng et al. <sup>[32]</sup> found that ML  
10 significantly improved the accuracy of cardiovascular risk prediction, increased the  
11 number of patients who could benefit from preventive treatment and avoided  
12 unnecessary treatment. Recent studies have shown that the application of ML  
13 techniques may have the potential to improve heart failure outcomes and management,  
14 including cost savings by improving existing diagnostic and treatment support  
15 systems.<sup>[33]</sup> ML algorithms also have been applied to predict SCD in some recent  
16 studies and results indicate their significant advantages for predicting SCD.<sup>[34, 35]</sup>  
17 However, more studies based on large-scale cohort are needed to evaluate ML for  
18 prediction of SCD in HF patients. Therefore, the application of ML for the prediction  
19 of SCD in HF patients with low LVEF is technically innovative and clinically  
20 significant.

## 41 AIMS

42 The purpose of our study is to develop and validate new models to improve the  
43 prediction of SCD in HF patients with low LVEF. The new strategies of identifying  
44 HF patients most likely to benefit from primary prevention ICD will improve the  
45 revolution of ICD indications. The specific research objective is to develop prediction  
46 models to evaluate prognosis and SCD risk respectively by ML methods and  
47 traditional COX proportional hazard regression in HF patients with low LVEF  
48 ( $\leq 35\%$ ).

## 58 METHODS AND ANALYSIS

### 59 Study design

1  
2  
3  
4 This study is a retro-prospective, multi-center, non-interventional, observational  
5 clinical registry. The primary sponsor is The First Affiliated Hospital of Nanjing  
6 Medical University. This study has been registered in the Chinese Clinical Trial  
7 Registry (ChiCTR-POC-17011842). The study will be conducted across 14  
8 cardiovascular departments in Tertiary A hospitals throughout the People's Republic  
9 of China. (see Supplement)  
10  
11  
12  
13  
14

15 The cases from January 2016 to December 2017 in the First Affiliated Hospital of  
16 Nanjing Medical University and Xiamen Cardiovascular Hospital Xiamen University  
17 will be collected retrospectively and followed-up prospectively. About 500  
18 retrospective cases meet the inclusion criteria according to preliminary estimation.  
19 The prospective recruitment has started in the above 14 hospitals since January 2018.  
20 The retrospective cases and the first 1000 prospective cases will be used to develop  
21 the prediction models. And the next 1000 prospective cases will be used for model  
22 validation. The flow diagram of the progress is illustrated in Figure 1.  
23  
24  
25  
26  
27  
28  
29  
30  
31  
32

### 33 **Inclusion criteria**

34 To participate in this study, patients must comply with all of the following

- 35 1. Diagnosis of HFrEF according to the 2016 ESC HF Guideline<sup>[8]</sup>
- 36 2. LVEF $\leq$ 35% (measured by Simpson's methods) after optimized medication  
37 including ACEI or ARB, beta-blocker and MRA if available and not contraindicated  
38 at least 3 months.
- 39 3. Signed informed consent.  
40  
41  
42  
43  
44  
45  
46  
47

### 48 **Exclusion criteria**

49 The patient with any of the following will be excluded:

- 50 1. Hypertrophic cardiomyopathy
- 51 2. Rheumatic heart disease
- 52 3. Congenital heart disease
- 53 4. Pulmonary heart disease
- 54 5. Pericardial diseases and myocarditis  
55  
56  
57  
58  
59  
60

- 1
- 2
- 3
- 4 6. Acute myocardial infarction in recent 3 months, including STEMI and NSTEMI
- 5
- 6 7. Aortic dissection
- 7
- 8 8. Severe hematologic disease including leukemia, lymphoma, aplastic anemia, etc.
- 9
- 10 9. Autoimmune disease
- 11
- 12 10. Malignant tumor
- 13
- 14 11. Hormone replacement
- 15
- 16 12. Application of other interventional clinical trials
- 17
- 18 13. Non-drug therapies for improving heart function: CRT-P/D, ICD, heart
- 19 transplantation, surgical resection of ventricular aneurysm, interventional left
- 20 ventricular restoration with Revivent<sup>(TM)</sup> / Parachute<sup>(TM)</sup> system), MitraClip therapy
- 21 for recurrent mitral regurgitation
- 22
- 23
- 24
- 25
- 26
- 27

## 28 **Endpoints**

### 29 ***Primary endpoint***

30 All-cause death and SCD, including cardiac death and death from other causes

### 31 ***Secondary endpoint***

32 Lethal arrhythmia, sudden cardiac arrest, cardiopulmonary resuscitation,  
33 rehospitalization due to HF  
34

## 35 **Recruitment and consent**

36 Participants will be identified and recruited at each of the participating centers. The  
37 clinical status of potential participants will be assessed, and their medical records will  
38 also be reviewed to confirm the eligibility according to the inclusion and exclusion  
39 criteria.  
40

41 The study details will be explained to all potentially eligible and interesting  
42 subjects. The patients who agree to attend this study will sign the informed consent  
43 form (ICF) indicating that they fully understand the study and their rights of  
44 confidentiality and withdrawal from the study without giving a reason.  
45  
46  
47  
48  
49  
50



## Baseline evaluation

Prognostic models of HF in the last 10 years have been reviewed, and the associated risk factors have been ranked according to their corresponding hazard ratio in respective risk models (Table 1, Figure 2). Age, sex, New York Heart Association (NYHA) class, LVEF, prior HF hospitalization, course of HF, severe valvular heart disease, atrial fibrillation, prior myocardial infarction / coronary artery bypass grafting (CABG), renal dysfunction, chronic obstructive pulmonary disease (COPD), diabetes mellitus, ischemic etiology, decreased systolic pressure, low body mass index (BMI), anemia, hyponatremia, high N-terminal pro-brain natriuretic peptide (NT-proBNP), uricemia, current smoker were included. Variables which were not listed in previous models but appear relevant to higher risk of SCD in HF patients, and would therefore, merit consideration, including syncope or pre-syncope, frequent premature ventricular beat, non-sustained ventricular tachycardia, complete left bundle branch block (CLBBB), long QT interval, increased QT dispersion. In addition, self-care ability, social support and psychological state including depression and anxiety, are also predictors for subsequent poor prognosis in HF patients. The above risk factors have been assessed and confirmed by an expert panel of cardiologists and statisticians and will be collected in this study particularly.

The baseline data that will be collected in all eligible subjects are as follows.

- Demographic characteristics: date of birth, gender, height and weight
- Lifestyle behavior: smoking and drinking status
- Vital signs: blood pressure and heart rate
- NYHA class
- Etiology of heart failure: The ischemic etiology will be confirmed if any following point is met: a. prior myocardial infarction or revascularization history (coronary artery bypass grafting, CABG / percutaneous coronary intervention, PCI); b. left main or proximal segment of the left anterior descending artery stenosis  $\geq 75\%$  showed by coronary angiogram (CAG); c. at least two main coronary artery branches stenosis  $\geq 75\%$  showed by CAG. Otherwise, non-ischemic HF should be identified.

- Prior HF hospitalization history: first HF hospitalization or not, times of prior HF hospitalization, the course of HF (since the HF symptoms appear; if unavailable, since the decreased EF was found).
- Coronary heart disease history: myocardial infarction or angina history, CAG result, revascularization history, recent angina.
- Arrhythmia history: atrial fibrillation, atrial flutter, premature atrial contraction (PAC), premature ventricular contraction (PVC), non-sustained VT (NSVT), sustained VT (SVT), ventricular fibrillation, and some bradyarrhythmias.
- Syncope or pre-syncope history
- Cardiac arrest/ cardiopulmonary resuscitation history
- Other histories: hypertension, diabetes mellitus, COPD, etc.
- Echocardiography: LV end-diastolic volume (LVEDV), LV end-systolic volume (LVESV) and LVEF measured by Simpson's method; Left atrial diameter, LV end-diastolic diameter (LVEDD) and LV end-systolic diameter (LVESD), pulmonary artery systolic pressure. The status of valve regurgitation will be evaluated (0-none; 1-mild; 2-mild to moderate; 3-moderate; 4- severe)
- ECG: Left / right bundle branch block will be recorded. QRS duration and QT interval will be tested, and QT dispersion will be calculated.
- Holter: total heartbeat of the whole day, minimum/ maximum/ average HR, onset of PVC, PAC, NSVT, VT, atrial fibrillation/ flutter.
- Laboratory tests results: serum creatinine, blood urea nitrogen (BUN), serum sodium, hemoglobin, Thyroid Stimulating Hormone (TSH), free triiodothyronine (FT3), free thyroxine (FT4), NT-proBNP.
- Medication: ACEI/ARB、 beta-blocker, aldosterone antagonist, diuretic, digoxin, antiplatelet agent, anticoagulant, statin, calcium channel blocker, antiarrhythmics, Ivabradine and angiotensin receptor blocker-neprilysin inhibitor (ARNI).
- Evaluation of self-care behavior and social support: 9-item European Heart Failure Self-care Behavior Scale (9-EHFScBS) <sup>[36]</sup> will be used to determine the self-care levels in HF patients. Social Support Rating Scale (SSRS)<sup>[37]</sup> will be used to evaluate the social support condition in HF patients.

- Assessment of psychological status: Hamilton Depression Scale (HAMD) and Hamilton Anxiety Scale (HAMA).
- Socioeconomic and educational status: marital status, educational status, monthly income, sources of medical expenses, medical insurance

### **Patient visits**

After being enrolled in this research, all the subjects will be followed-up periodically in the outpatient department or by telephone interview every 3 months. The compliance with medications will be evaluated. As the primary endpoint, all-cause death and SCD will be focused. Cause of death will be analyzed in detail. SCD is defined by the World Health Organization as unexpected death that occurs within 1 hour from the onset of new or worsening symptoms (witnessed arrest) or, if unwitnessed, within 24h from when the individual was last observed alive and asymptomatic<sup>[38]</sup>. The lethal arrhythmia including VT/VF, sudden cardiac arrest, cardiopulmonary resuscitation, and rehospitalization due to HF will be recorded carefully.

During follow-up, lethal arrhythmia will be recognized more precisely for patients who receive ICD or CRT/D implantation, and will be recorded as an adverse event. The patients, who receive CRT-P/D, heart transplantation, surgical resection of a ventricular aneurysm, interventional left ventricular restoration with Revivent<sup>(TM)</sup> / Parachute<sup>(TM)</sup> system), MitraClip therapy for recurrent mitral regurgitation, or some other non-drug therapy to improve heart function, will be followed up as usual.

### **Data collection**

In the prospective part, clinical data of subjects will be collected and filled in the electrical data capture (EDC) system at baseline and particular follow-up visit. In the retrospective part, the same baseline information, except for 9-EHFScBS, SSRS, HAMD, HAMA questionnaires, will also be captured and input into the EDC system. The following prospective visits (every three months) will be conducted regularly and will be recorded in the EDC system. Investigators will record all the information of

1  
2  
3  
4 adverse events (AE), study bias, withdrawal from the study or death in EDC system.  
5  
6 In this study, the participants will be identified by study codes, and their names will  
7  
8 not appear in the EDC system. All the personal information including contact  
9  
10 information, medical record and outcome, will not be revealed to any person who has  
11  
12 not been authorized by a principal investigator. Professional staffs are responsible for  
13  
14 database management, data maintenance and regular data backup. Data quality will be  
15  
16 monitored regularly. The data collection checklist is showed in Table 2.

### 17 18 19 **Data pre-processing**

20  
21 All above-collected variables, which might be predictors of all adverse prognosis of  
22  
23 HF described in endpoint events, will be classified as uncontrollable variables (e.g.  
24  
25 age, gender, history), controllable variables associated with heart (e.g. NYHA class,  
26  
27 LVEF, increased heart rate) and controllable variables beyond heart (e.g. smoking,  
28  
29 anemia, diabetes mellitus). Appropriate dummy variables will be used for binary  
30  
31 variables and categorical variables, and quantitative variables will be fitted as a single  
32  
33 continuous measurement (e.g. age, heart rate, NT-proBNP), unless there is clear  
34  
35 evidence of nonlinearity. In order to create a practice simple risk score, some  
36  
37 continuous variables will also be categorized into several groups according to both  
38  
39 common clinical cut points and expert advice.

### 40 41 42 **Machine learning**

43  
44 Variable selection is the process of selecting a subset of relevant variables for use in  
45  
46 model construction, which can substantially reduce the abundant information and  
47  
48 decrease the number of variables that are input to the prediction model. In this study,  
49  
50 the technique named as “information gain ranking” will be used to select appropriate  
51  
52 variables. Information gain represents the effectiveness of a variable based on entropy,  
53  
54 which characterizes the unpredictability of a system. The information gain of a  
55  
56 variable is evaluated as the entropy difference of the system when including and  
57  
58 excluding this variable. Then the variables whose information gain scores are less  
59  
60 than a threshold are considered to be insignificant and will be excluded from the

prediction.

Prediction models for SCD in HF patients will be developed by the following classification algorithms respectively: decision trees, logistic regression, support vector machine, random forest, and artificial neural network. [29] The performance and general error estimation of these ML models will be assessed by 10-fold cross-validation. The dataset will be randomly divided into 10 equal folds. 9 folds will be used as the training set with the remaining one fold as the validation set. The validation results from 10 repeats will be combined to provide a measure of the overall performance. The prediction models derived from the above classification algorithms above will be evaluated based on the accuracy, sensitivities, specificities and the area under the Receiver operating characteristic curve. Finally, clinical experts and computer specialists will discuss and choose the best model to predict the prognosis of SCD in HF patients and then perform further validation with the prospective dataset.

### **COX proportional hazards regression**

Univariable COX proportional hazards modeling will be used to identify strong independent baseline candidate predictors for the primary and secondary outcomes. We will use both forward and backward stepwise procedure to derive the multivariable COX proportional hazards model with  $p < 0.05$  as the inclusion criterion. Every variable in the model will be multiplied by its  $\beta$ -coefficient, and the products will be summed to calculate the risk score. Risk function will be used to estimate the level of risk. The calculating formula is as follows.[39]

$$P = h(t_j; X_k) = h_0(t_j) \exp(SCORE)$$

$$SCORE = X_k \beta_k = \beta_0 + \beta_1 x_1 + \beta_2 x_2 + \dots + \beta_p x_p$$

### **Model validation**

The dynamic prospective cases will be used for external validation of the optimal ML and COX proportional hazards models. The validation will be performed using the models to calculate the probability of the outcome of interest occurring for each

1  
2  
3  
4 individual included in the validation sample when compared with the events actually  
5 observed to occur in this sample. The discrimination of each model will be estimated  
6 by receiver-operating characteristic (ROC) curve. The calibration of the models will  
7 be assessed by the Hosmer-Lemeshow goodness-of-fit test. The ML prediction model  
8 will be compared with the COX proportional hazards regression model.  
9  
10  
11  
12  
13  
14

### 15 **Patient and public involvement statement**

16  
17 During the design of this study, a survey of patient requirements, including  
18 communication needs, follow-up frequency, visit cost etc., was conducted in  
19 population of potential HF participants, which provided important evidence for  
20 drawing up this study protocol to meet most of the patients' needs, build close contact  
21 with patients, enhance the overall adherence and improve the accuracy of endpoint  
22 event. This study is not a patient-led research, and patients are not involved in the  
23 recruitment of the study. The study results will be informed to the participants by  
24 phone at the end of this study. The alive patients will be evaluated with the new  
25 prediction model, and the ICD intervention will be recommended to the high SCD  
26 risk patients.  
27  
28  
29  
30  
31  
32  
33  
34  
35  
36  
37  
38

### 39 **Study timeframe**

40 The retrospective data collection in the two sub-centers started in March 2017, and  
41 prospective enrollment in all 14 sub-centers has started in January 2018. The  
42 follow-up period is scheduled to end in December 2019. The major part of data  
43 analysis will be performed from January to June 2020. The study framework and  
44 process is summarized in Figure 3.  
45  
46  
47  
48  
49  
50  
51

### 52 **ETHICS AND DISSEMINATION**

53 The study protocol has been approved by the Ethics Committee of The First Affiliated  
54 Hospital of Nanjing Medical University (2017-SR-06). All necessary information  
55 about this study will be disclosed to the patients. Every subject will be asked to sign  
56 the ICF, indicating that they fully understand the study and voluntarily participate in  
57  
58  
59  
60

1  
2  
3  
4 this study. All results of this study will be published in international peer-reviewed  
5  
6 journals and presented at relevant conferences.  
7  
8

## 9 10 **DISCUSSION**

11 The evaluation of SCD risk in HF patients is a problem that urgently needed to be  
12  
13 solved. The existing prediction strategies for the SCD risk in HF patients lack clinical  
14  
15 practice value for various reasons. ICD indication for primary prevention of SCD  
16  
17 could be optimized by identifying the high SCD risk patients in HF with low LVEF  
18  
19 ( $\leq 35\%$ ). It is of great practical value and economic significance.  
20

21 We reviewed some predictive studies of HF in the past years and ranked the risk  
22  
23 factors according to their corresponding hazard ratio, which have been included in our  
24  
25 study as candidate risk factors. Otherwise, some other variables which appear relevant  
26  
27 to risk of SCD in HF patients are also collected. Therefore, the efficiency and  
28  
29 practicality of predictive model development has been highly improved.  
30

31 This study is the first multicenter registry study in China, aimed to investigate the  
32  
33 feasibility and accuracy of applying ML to predict SCD in HF patients with low  
34  
35 LVEF. A broad range of outcomes, including SCD, all-cause death, lethal arrhythmia,  
36  
37 sudden cardiac arrest, cardiopulmonary resuscitation and rehospitalization due to HF,  
38  
39 will be evaluated in this study, and the corresponding prognostic models will be  
40  
41 developed. Machine learning and the traditional multivariable COX proportional  
42  
43 hazards regression model will be derived from the same database and will be  
44  
45 compared.  
46

47 The limitations of this study are as follows: 1. HF patients with LVEF $>35\%$  will  
48  
49 not be included based on the design of this study, which will restrict the application of  
50  
51 the results of this study to the HF with low LVEF. 2. It might be difficult to determine  
52  
53 the endpoint of this study sometimes for some patients, when dealing with SCD,  
54  
55 lethal arrhythmia and sudden cardiac arrest, especially when outside the hospital.  
56  
57  
58  
59  
60

Table 1. The risk model for HF in the literature

| Author                   | Database       | Year | Variables (n) | Patients (n) | Endpoints                                                                   |
|--------------------------|----------------|------|---------------|--------------|-----------------------------------------------------------------------------|
| Agostoni <sup>[14]</sup> | MECKI          | 2012 | 6             | 2716         | Cardiovascular death; urgent cardiac transplant                             |
| Barlera <sup>[15]</sup>  | GISSI-HF       | 2013 | 14            | 6975         | all-cause mortality                                                         |
| Collier <sup>[16]</sup>  | EMPHASIS-HF    | 2013 | 10            | 2737         | all-cause mortality                                                         |
| Komajda <sup>[17]</sup>  | I-PRESERVE     | 2011 | 12            | 4128         | all-cause mortality                                                         |
| Levy <sup>[18]</sup>     | SHFM           | 2006 | 14            | 1125         | Survival                                                                    |
| O'Connor <sup>[19]</sup> | HF-ACTION      | 2012 | 4             | 2331         | all-cause mortality                                                         |
| Pocock <sup>[20]</sup>   | CHARM          | 2006 | 21            | 7599         | all-cause mortality                                                         |
| Pocock <sup>[21]</sup>   | MAGGIC         | 2012 | 13            | 39372        | all-cause mortality                                                         |
| Senni <sup>[22]</sup>    | CVM-HF         | 2006 | 13            | 292          | all-cause mortality                                                         |
| Senni <sup>[23]</sup>    | 3C-HF          | 2013 | 11            | 2016         | all-cause mortality; urgent heart transplant (1year)                        |
| Vazquez <sup>[24]</sup>  | MUSIC          | 2009 | 10            | 992          | all-cause mortality; cardiac mortality; pump failure death, sudden death    |
| Nicole <sup>[25]</sup>   | BARDICHE-index | 2017 | 8             | 1811         | all-cause mortality; all-cause hospitalization; CHF-related hospitalization |

Table 2 The checklist for data collection

| Data collection                                                                                | Baseline            |                   | regular visit | withdraw /death |
|------------------------------------------------------------------------------------------------|---------------------|-------------------|---------------|-----------------|
|                                                                                                | Retrospective cases | Prospective cases |               |                 |
| Informed consent                                                                               | ✓                   | ✓                 |               |                 |
| Quantification verification (inclusion and exclusion)                                          | ✓                   | ✓                 |               |                 |
| Baseline evaluation                                                                            | ✓                   | ✓                 |               |                 |
| Medication                                                                                     | ✓                   | ✓                 |               |                 |
| Questionnaires<br>9-EHFScBS<br>SSRS<br>HAMD<br>HAMA<br>socioeconomic and<br>educational status |                     | ✓                 |               |                 |
| Regular follow-up visit (every 3 months)                                                       |                     |                   | ✓             |                 |
| Survival state                                                                                 | ✓                   |                   | ✓             | ✓               |
| Adverse event                                                                                  | Once happen ✓       |                   |               |                 |
| Study bias                                                                                     | Once happen ✓       |                   |               |                 |
| Withdraw from the study                                                                        | Once happen ✓       |                   |               |                 |
| Death                                                                                          | Once happen ✓       |                   |               |                 |



1  
2  
3 Figure 1 Flow diagram of progress  
4  
5

6 Figure 2 Hazard ratio of variables in different risk models

7 NYHA, New York Heart Association; VHD, valvular heart disease; Af, atrial fibrillation; MI, myocardial  
8 infarction; CAGB, coronary artery bypass grafting; COPD, chronic obstructive pulmonary disease;

9 DM, diabetes mellitus; ICM, ischemic cardiomyopathy; HR, heart rate; SBP, systolic blood pressure; BMI, body  
10 mass index; BNP, brain natriuretic peptide  
11  
12

13  
14 Figure 3 Study framework and process  
15

## 16 FOOTNOTES

17  
18 **Acknowledgements** The authors thank Xiamen Cardiovascular Hospital, Xiamen  
19 University (Xiamen, China), Wuhan Asia Heart Hospital (Wuhan, China), Jiangning  
20 Hospital Affiliated to Nanjing Medical University, (Nanjing, China), The Second  
21 People's Hospital of Lianyungang (Lianyungang, China), The Affiliated Hospital of  
22 Jiangsu University (Zhenjiang, China), Taixing People's Hospital (Taixing, China),  
23 The First People's Hospital of Huaian (Huaian, China), The First People's Hospital of  
24 Yancheng (Yancheng, China), Rugao People's Hospital (Rugao, China), The First  
25 People's Hospital of Zhangjiagang (Zhangjiagang, China), The Third People's  
26 Hospital of Suzhou (Suzhou, China), The Third People's Hospital of Wuxi (Wuxi,  
27 China), The Second Affiliated Hospital of Nanjing Medical University (Nanjing,  
28 China) for collaboration including recruitment and follow-up of HF patients. The  
29 authors also thank the HF patients who participated in the survey of patient  
30 requirements during the design of this study.  
31  
32

33  
34 **Contributors** JGZ and FQM conceived and designed the study. ZHZ, XFH, ZYQ,  
35 YW, YHC, YLW, YZ, ZC, XWZ, JY, JLZ, JHG, KBL, LC, RJZ, HJ participated in  
36 different phases of the protocol design. WHZ provide expertise in data processing and  
37 machine learning. SWT and YYW provided their expertise for traditional statistical  
38 analysis. JGZ obtained funding. FQM drafted the final manuscript. All authors have  
39 read the manuscript and provided feedback. JGZ approved the final version of the  
40 manuscript before submission. FQM took responsibility for the submission process.  
41  
42

43  
44 **Funding** This study was supported mainly by Jiangsu Province's Key Medical Center  
45 (grant number: YXZX2016010; PI: Jiangang Zou, MD, Ph.D.); in part by National  
46  
47  
48  
49  
50  
51  
52  
53  
54  
55  
56  
57  
58  
59  
60

1  
2  
3  
4 Natural Science Foundation of China (grant number: 81470457; PI: Jiangang Zou,  
5 MD, Ph.D.) and Jiangsu Science and Technology Department (grant number:  
6 BE2016764; PI: Jiangang Zou, MD, Ph.D.). This research was also supported in part  
7 by an AHA grant (grant number: 17AIREA33700016; PI: Weihua Zhou, Ph.D.) and a  
8 New Faculty startup grant from the University of Southern Mississippi (grant number:  
9 DE01791; PI: Weihua Zhou, Ph.D.).  
10  
11  
12  
13  
14

15 **Competing interests** We have read and understood BMJ policy on declaration of  
16 interests and declare that we have no competing interests.  
17  
18

19 **Ethics approval** This study has been approved by the Ethics Committee of The First  
20 Affiliated Hospital of Nanjing Medical University (2017-SR-06).  
21  
22

23 **Provenance and peer review** Not commissioned; externally peer reviewed.  
24

25 **Data sharing statement** No additional data are available.  
26

## 27 Reference

- 28  
29 [1] Sato N. Epidemiology of Heart Failure in Asia[J]. *Heart Fail Clin*, 2015,11(4):573-579.  
30 [2] Mozaffarian D, Benjamin E J, Go A S, et al. Heart disease and stroke statistics--2015 update: a  
31 report from the American Heart Association[J]. *Circulation*, 2015,131(4):e29-e322.  
32 [3] Tomaselli G F, Zipes D P. What causes sudden death in heart failure?[J]. *Circ Res*,  
33 2004,95(8):754-763.  
34 [4] Solomon S D, Wang D, Finn P, et al. Effect of candesartan on cause-specific mortality in heart  
35 failure patients: the Candesartan in Heart failure Assessment of Reduction in Mortality and  
36 morbidity (CHARM) program[J]. *Circulation*, 2004,110(15):2180-2183.  
37 [5] Yousuf O, Chrispin J, Tomaselli G F, et al. Clinical management and prevention of sudden  
38 cardiac death[J]. *Circ Res*, 2015,116(12):2020-2040.  
39 [6] Connolly S J, Hallstrom A P, Cappato R, et al. Meta-analysis of the implantable cardioverter  
40 defibrillator secondary prevention trials. AVID, CASH and CIDS studies. Antiarrhythmics vs  
41 Implantable Defibrillator study. Cardiac Arrest Study Hamburg . Canadian Implantable  
42 Defibrillator Study[J]. *Eur Heart J*, 2000,21(24):2071-2078.  
43 [7] Myerburg R J, Spooner P M. Opportunities for sudden death prevention: directions for new  
44 clinical and basic research[J]. *Cardiovasc Res*, 2001,50(2):177-185.  
45 [8] Ponikowski P, Voors A A, Anker S D, et al. 2016 ESC Guidelines for the diagnosis and treatment  
46 of acute and chronic heart failure: The Task Force for the diagnosis and treatment of acute and  
47 chronic heart failure of the European Society of Cardiology (ESC)Developed with the special  
48 contribution of the Heart Failure Association (HFA) of the ESC[J]. *Eur Heart J*,  
49 2016,37(27):2129-2200.  
50 [9] Kober L, Thune J J, Nielsen J C, et al. Defibrillator Implantation in Patients with Nonischemic  
51 Systolic Heart Failure[J]. *N Engl J Med*, 2016,375(13):1221-1230.  
52 [10] Myerburg R J, Spooner P M. Opportunities for sudden death prevention: directions for new  
53 clinical and basic research[J]. *Cardiovasc Res*, 2001,50(2):177-185.  
54  
55  
56  
57  
58  
59  
60

- 1  
2  
3  
4  
5  
6  
7  
8  
9  
10  
11  
12  
13  
14  
15  
16  
17  
18  
19  
20  
21  
22  
23  
24  
25  
26  
27  
28  
29  
30  
31  
32  
33  
34  
35  
36  
37  
38  
39  
40  
41  
42  
43  
44  
45  
46  
47  
48  
49  
50  
51  
52  
53  
54  
55  
56  
57  
58  
59  
60
- [11] Stecker E C, Vickers C, Waltz J, et al. Population-based analysis of sudden cardiac death with and without left ventricular systolic dysfunction: two-year findings from the Oregon Sudden Unexpected Death Study[J]. *J Am Coll Cardiol*, 2006,47(6):1161-1166.
  - [12] Aimo A, Januzzi J J, Vergaro G, et al. Left ventricular ejection fraction for risk stratification in chronic systolic heart failure[J]. *Int J Cardiol*, 2018.
  - [13] Shen L, Jhund P S, Petrie M C, et al. Declining Risk of Sudden Death in Heart Failure[J]. *N Engl J Med*, 2017,377(1):41-51.
  - [14] Agostoni P, Corra U, Cattadori G, et al. Metabolic exercise test data combined with cardiac and kidney indexes, the MECKI score: a multiparametric approach to heart failure prognosis[J]. *Int J Cardiol*, 2013,167(6):2710-2718.
  - [15] Barlera S, Tavazzi L, Franzosi M G, et al. Predictors of mortality in 6975 patients with chronic heart failure in the Gruppo Italiano per lo Studio della Streptochinasi nell'Infarto Miocardico-Heart Failure trial: proposal for a nomogram[J]. *Circ Heart Fail*, 2013,6(1):31-39.
  - [16] Collier T J, Pocock S J, McMurray J J, et al. The impact of eplerenone at different levels of risk in patients with systolic heart failure and mild symptoms: insight from a novel risk score for prognosis derived from the EMPHASIS-HF trial[J]. *Eur Heart J*, 2013,34(36):2823-2829.
  - [17] Komajda M, Carson P E, Hetzel S, et al. Factors associated with outcome in heart failure with preserved ejection fraction: findings from the Irbesartan in Heart Failure with Preserved Ejection Fraction Study (I-PRESERVE)[J]. *Circ Heart Fail*, 2011,4(1):27-35.
  - [18] Levy W C, Mozaffarian D, Linker D T, et al. The Seattle Heart Failure Model: prediction of survival in heart failure[J]. *Circulation*, 2006,113(11):1424-1433.
  - [19] O'Connor C M, Whellan D J, Wojdyla D, et al. Factors related to morbidity and mortality in patients with chronic heart failure with systolic dysfunction: the HF-ACTION predictive risk score model[J]. *Circ Heart Fail*, 2012,5(1):63-71.
  - [20] Pocock S J, Wang D, Pfeffer M A, et al. Predictors of mortality and morbidity in patients with chronic heart failure[J]. *Eur Heart J*, 2006,27(1):65-75.
  - [21] Pocock S J, Ariti C A, McMurray J J, et al. Predicting survival in heart failure: a risk score based on 39 372 patients from 30 studies[J]. *Eur Heart J*, 2013,34(19):1404-1413.
  - [22] Senni M, Santilli G, Parrella P, et al. A novel prognostic index to determine the impact of cardiac conditions and co-morbidities on one-year outcome in patients with heart failure[J]. *Am J Cardiol*, 2006,98(8):1076-1082.
  - [23] Senni M, Parrella P, De Maria R, et al. Predicting heart failure outcome from cardiac and comorbid conditions: the 3C-HF score[J]. *Int J Cardiol*, 2013,163(2):206-211.
  - [24] Vazquez R, Bayes-Genis A, Cygankiewicz I, et al. The MUSIC Risk score: a simple method for predicting mortality in ambulatory patients with chronic heart failure[J]. *Eur Heart J*, 2009,30(9):1088-1096.
  - [25] Uszko-Lencer N, Frankenstein L, Spruit M A, et al. Predicting hospitalization and mortality in patients with heart failure: The BARDICHE-index[J]. *Int J Cardiol*, 2017,227:901-907.
  - [26] Delgado V, Bucciarelli-Ducci C, Bax J J. Diagnostic and prognostic roles of echocardiography and cardiac magnetic resonance[J]. *J Nucl Cardiol*, 2016,23(6):1399-1410.
  - [27] Halliday B P, Cleland J, Goldberger J J, et al. Personalizing Risk Stratification for Sudden Death in Dilated Cardiomyopathy: The Past, Present, and Future[J]. *Circulation*, 2017,136(2):215-231.
  - [28] Kelesidis I, Travin M I. Use of cardiac radionuclide imaging to identify patients at risk for arrhythmic sudden cardiac death[J]. *J Nucl Cardiol*, 2012,19(1):142-152, 153-157.

- 1  
2  
3 [29] Martins D S M, Vidigal F M, Morao M A. Iodine-123-metaiodobenzylguanidine scintigraphy in  
4 risk stratification of sudden death in heart failure[J]. Rev Port Cardiol, 2013,32(6):509-516.  
5  
6 [30] Aro A L, Reinier K, Rusinaru C, et al. Electrical risk score beyond the left ventricular ejection  
7 fraction: prediction of sudden cardiac death in the Oregon Sudden Unexpected Death Study and  
8 the Atherosclerosis Risk in Communities Study[J]. Eur Heart J, 2017,38(40):3017-3025.  
9  
10 [31] Quinlan J R. Induction of decision trees. Machine learning 1.1[M]. 1986.  
11 [32] Weng S F, Reips J, Kai J, et al. Can machine-learning improve cardiovascular risk prediction using  
12 routine clinical data?[J]. PLoS One, 2017,12(4):e174944.  
13 [33] Awan S E, Sohel F, Sanfilippo F M, et al. Machine learning in heart failure: ready for prime  
14 time[J]. Curr Opin Cardiol, 2018,33(2):190-195.  
15 [34] Ebrahimzadeh E, Foroutan A, Shams M, et al. An optimal strategy for prediction of sudden  
16 cardiac death through a pioneering feature-selection approach from HRV signal[J]. Comput  
17 Methods Programs Biomed, 2019,169:19-36.  
18 [35] Au-Yeung W M, Reinhall P G, Bardy G H, et al. Development and validation of warning system  
19 of ventricular tachyarrhythmia in patients with heart failure with heart rate variability data[J].  
20 PLoS One, 2018,13(11):e207215.  
21 [36] Jaarsma T, Arestedt K F, Martensson J, et al. The European Heart Failure Self-care Behaviour  
22 scale revised into a nine-item scale (EHFScB-9): a reliable and valid international instrument[J].  
23 Eur J Heart Fail, 2009,11(1):99-105.  
24 [37] Hu X, Hu X, Su Y, et al. The changes and factors associated with post-discharge self-care  
25 behaviors among Chinese patients with heart failure[J]. Patient Prefer Adherence,  
26 2015,9:1593-1601.  
27 [38] Yousuf O, Chrispin J, Tomaselli G F, et al. Clinical management and prevention of sudden  
28 cardiac death[J]. Circ Res, 2015,116(12):2020-2040.  
29 [39] Harrell F J, Lee K L, Califf R M, et al. Regression modelling strategies for improved prognostic  
30 prediction[J]. Stat Med, 1984,3(2):143-152.  
31  
32  
33  
34  
35  
36  
37  
38  
39  
40  
41  
42  
43  
44  
45  
46  
47  
48  
49  
50  
51  
52  
53  
54  
55  
56  
57  
58  
59  
60

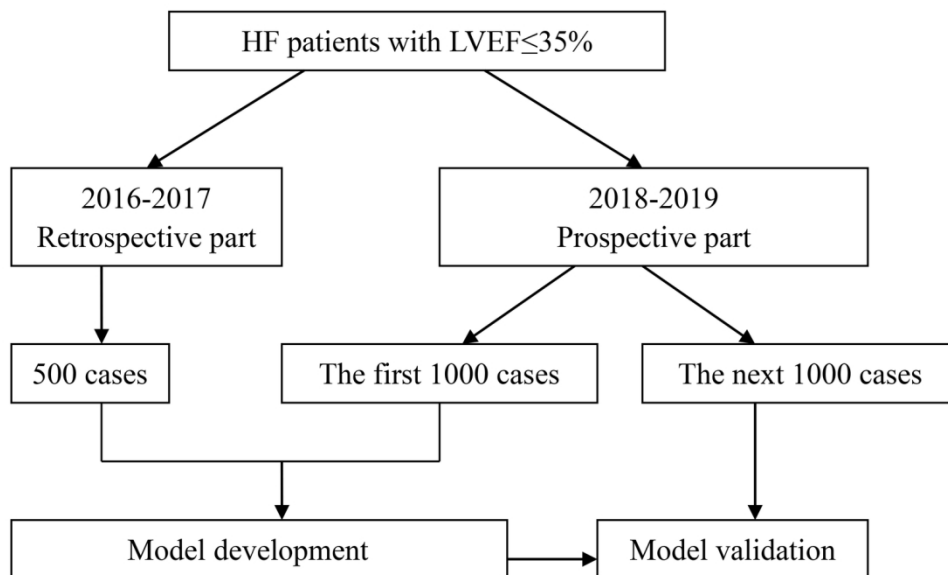

Figure 1 Flow diagram of progress

140x104mm (300 x 300 DPI)

1  
2  
3  
4  
5  
6  
7  
8  
9  
10  
11  
12  
13  
14  
15  
16  
17  
18  
19  
20  
21  
22  
23  
24  
25  
26  
27  
28  
29  
30  
31  
32  
33  
34  
35  
36  
37  
38  
39  
40  
41  
42  
43  
44  
45  
46  
47  
48  
49  
50  
51  
52  
53  
54  
55  
56  
57  
58  
59  
60

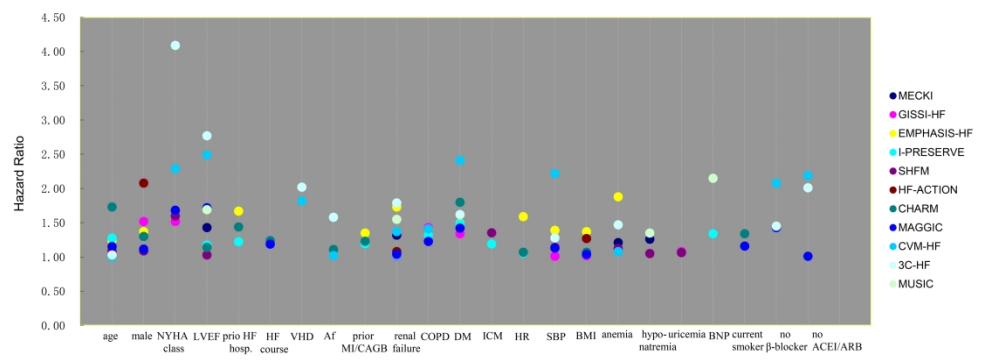

Figure 2 Hazard ratio of variables in different risk models  
 NYHA, New York Heart Association; VHD, valvular heart disease; Af, atrial fibrillation; MI, myocardial infarction; CAGB, coronary artery bypass grafting; COPD, chronic obstructive pulmonary disease; DM, diabetes mellitus; ICM, ischemic cardiomyopathy; HR, heart rate; SBP, systolic blood pressure; BMI, body mass index; BNP, brain natriuretic peptide

325x126mm (300 x 300 DPI)

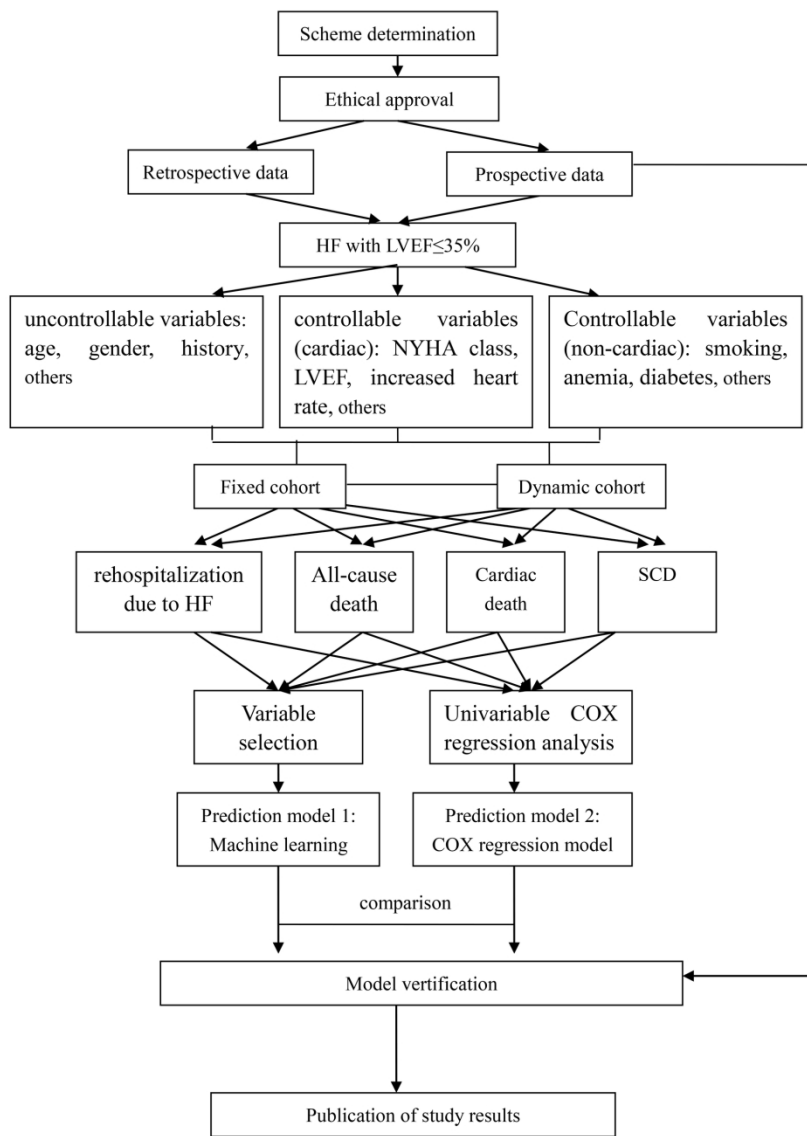

Figure 3 Study framework and process

158x226mm (300 x 300 DPI)

## List of Hospitals

The First Affiliated Hospital of Nanjing Medical University, Nanjing

Xiamen Cardiovascular Hospital, Xiamen University, Xiamen

Wuhan Asia Heart Hospital, Wuhan

Jiangning Hospital Affiliated to Nanjing Medical University, Nanjing

The Second People's Hospital of Lianyungang, Lianyungang

The Affiliated Hospital of Jiangsu University, Zhenjiang

Taixing People's Hospital, Taixing

The First People's Hospital of Huaian, Huaian

The First People's Hospital of Yancheng, Yancheng

Rugao People's Hospital, Rugao

The First People's Hospital of Zhangjiagang, Zhangjiagang

The Third People's Hospital of Suzhou, Suzhou

The Third People's Hospital of Wuxi, Wuxi

The Second Affiliated Hospital of Nanjing Medical University, Nanjing



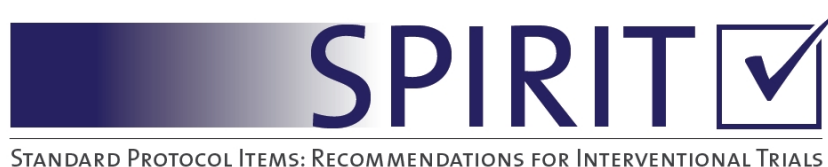

SPIRIT 2013 Checklist: Recommended items to address in a clinical trial protocol and related documents\*

| Section/item                      | Item No | Description                                                                                                                                                                                                                                                                                               |
|-----------------------------------|---------|-----------------------------------------------------------------------------------------------------------------------------------------------------------------------------------------------------------------------------------------------------------------------------------------------------------|
| <b>Administrative information</b> |         |                                                                                                                                                                                                                                                                                                           |
| Title                             | 1       | Descriptive title identifying the study design, population, interventions, and, if applicable, trial acronym <b>(P1)</b>                                                                                                                                                                                  |
| Trial registration                | 2a      | Trial identifier and registry name. If not yet registered, name of intended registry <b>(P7)</b>                                                                                                                                                                                                          |
|                                   | 2b      | All items from the World Health Organization Trial Registration Data Set <b>(P7)</b>                                                                                                                                                                                                                      |
| Protocol version                  | 3       | Date and version identifier                                                                                                                                                                                                                                                                               |
| Funding                           | 4       | Sources and types of financial, material, and other support <b>(P17-18)</b>                                                                                                                                                                                                                               |
| Roles and responsibilities        | 5a      | Names, affiliations, and roles of protocol contributors <b>(P1, P17)</b>                                                                                                                                                                                                                                  |
|                                   | 5b      | Name and contact information for the trial sponsor <b>(P1, P7)</b>                                                                                                                                                                                                                                        |
|                                   | 5c      | Role of study sponsor and funders, if any, in study design; collection, management, analysis, and interpretation of data; writing of the report; and the decision to submit the report for publication, including whether they will have ultimate authority over any of these activities <b>(P7, P17)</b> |
|                                   | 5d      | Composition, roles, and responsibilities of the coordinating centre, steering committee, endpoint adjudication committee, data management team, and other individuals or groups overseeing the trial, if applicable (see Item 21a for data monitoring committee) <b>(P7, P11-12)</b>                      |
| <b>Introduction</b>               |         |                                                                                                                                                                                                                                                                                                           |
| Background and rationale          | 6a      | Description of research question and justification for undertaking the trial, including summary of relevant studies (published and unpublished) examining benefits and harms for each intervention <b>(P4-6)</b>                                                                                          |
|                                   | 6b      | Explanation for choice of comparators <b>(P5-6)</b>                                                                                                                                                                                                                                                       |
| Objectives                        | 7       | Specific objectives or hypotheses <b>(P6)</b>                                                                                                                                                                                                                                                             |

1  
2 Trial design 8 Description of trial design including type of trial (eg, parallel group,  
3 crossover, factorial, single group), allocation ratio, and framework (eg,  
4 superiority, equivalence, noninferiority, exploratory) **(P6-7)**  
5  
6  
7

8 **Methods: Participants, interventions, and outcomes**  
9

10 Study setting 9 Description of study settings (eg, community clinic, academic hospital)  
11 and list of countries where data will be collected. Reference to where  
12 list of study sites can be obtained **(P6-7)**  
13

14 Eligibility criteria 10 Inclusion and exclusion criteria for participants. If applicable, eligibility  
15 criteria for study centres and individuals who will perform the  
16 interventions (eg, surgeons, psychotherapists) **(P7-8)**  
17  
18

19 Interventions 11a Interventions for each group with sufficient detail to allow replication,  
20 including how and when they will be administered **(Not applicable)**  
21  
22 11b Criteria for discontinuing or modifying allocated interventions for a  
23 given trial participant (eg, drug dose change in response to harms,  
24 participant request, or improving/worsening disease) **(Not applicable)**  
25

26 11c Strategies to improve adherence to intervention protocols, and any  
27 procedures for monitoring adherence (eg, drug tablet return,  
28 laboratory tests) **(Not applicable)**  
29

30 11d Relevant concomitant care and interventions that are permitted or  
31 prohibited during the trial **(Not applicable)**  
32  
33

34 Outcomes 12 Primary, secondary, and other outcomes, including the specific  
35 measurement variable (eg, systolic blood pressure), analysis metric  
36 (eg, change from baseline, final value, time to event), method of  
37 aggregation (eg, median, proportion), and time point for each  
38 outcome. Explanation of the clinical relevance of chosen efficacy and  
39 harm outcomes is strongly recommended **(P8)**  
40  
41

42 Participant 13 Time schedule of enrolment, interventions (including any run-ins and  
43 timeline washouts), assessments, and visits for participants. A schematic  
44 diagram is highly recommended **(see Figure1)**  
45

46 Sample size 14 Estimated number of participants needed to achieve study objectives  
47 and how it was determined, including clinical and statistical  
48 assumptions supporting any sample size calculations **(P7)**  
49  
50

51 Recruitment 15 Strategies for achieving adequate participant enrolment to reach  
52 target sample size **(P8)**  
53

54 **Methods: Assignment of interventions (for controlled trials)**  
55

56 Allocation:  
57  
58  
59  
60

|    |                |     |                                                                           |
|----|----------------|-----|---------------------------------------------------------------------------|
| 1  |                |     |                                                                           |
| 2  | Sequence       | 16a | Method of generating the allocation sequence (eg, computer-               |
| 3  | generation     |     | generated random numbers), and list of any factors for stratification.    |
| 4  |                |     | To reduce predictability of a random sequence, details of any planned     |
| 5  |                |     | restriction (eg, blocking) should be provided in a separate document      |
| 6  |                |     | that is unavailable to those who enrol participants or assign             |
| 7  |                |     | interventions <b>(Not applicable)</b>                                     |
| 8  |                |     |                                                                           |
| 9  |                |     |                                                                           |
| 10 | Allocation     | 16b | Mechanism of implementing the allocation sequence (eg, central            |
| 11 | concealment    |     | telephone; sequentially numbered, opaque, sealed envelopes),              |
| 12 | mechanism      |     | describing any steps to conceal the sequence until interventions are      |
| 13 |                |     | assigned <b>(Not applicable)</b>                                          |
| 14 |                |     |                                                                           |
| 15 | Implementation | 16c | Who will generate the allocation sequence, who will enrol participants,   |
| 16 |                |     | and who will assign participants to interventions <b>(Not applicable)</b> |
| 17 |                |     |                                                                           |
| 18 |                |     |                                                                           |
| 19 | Blinding       | 17a | Who will be blinded after assignment to interventions (eg, trial          |
| 20 | (masking)      |     | participants, care providers, outcome assessors, data analysts), and      |
| 21 |                |     | how <b>(Not applicable)</b>                                               |
| 22 |                |     |                                                                           |
| 23 |                | 17b | If blinded, circumstances under which unblinding is permissible, and      |
| 24 |                |     | procedure for revealing a participant's allocated intervention during     |
| 25 |                |     | the trial <b>(Not applicable)</b>                                         |
| 26 |                |     |                                                                           |
| 27 |                |     |                                                                           |

### Methods: Data collection, management, and analysis

|    |                 |     |                                                                            |
|----|-----------------|-----|----------------------------------------------------------------------------|
| 28 |                 |     |                                                                            |
| 29 |                 |     |                                                                            |
| 30 | Data collection | 18a | Plans for assessment and collection of outcome, baseline, and other        |
| 31 | methods         |     | trial data, including any related processes to promote data quality (eg,   |
| 32 |                 |     | duplicate measurements, training of assessors) and a description of        |
| 33 |                 |     | study instruments (eg, questionnaires, laboratory tests) along with        |
| 34 |                 |     | their reliability and validity, if known. Reference to where data          |
| 35 |                 |     | collection forms can be found, if not in the protocol <b>(P8-12)</b>       |
| 36 |                 |     |                                                                            |
| 37 |                 |     |                                                                            |
| 38 |                 | 18b | Plans to promote participant retention and complete follow-up,             |
| 39 |                 |     | including list of any outcome data to be collected for participants who    |
| 40 |                 |     | discontinue or deviate from intervention protocols <b>(P11)</b>            |
| 41 |                 |     |                                                                            |
| 42 | Data            | 19  | Plans for data entry, coding, security, and storage, including any         |
| 43 | management      |     | related processes to promote data quality (eg, double data entry;          |
| 44 |                 |     | range checks for data values). Reference to where details of data          |
| 45 |                 |     | management procedures can be found, if not in the protocol <b>(P11-12)</b> |
| 46 |                 |     |                                                                            |
| 47 |                 |     |                                                                            |
| 48 | Statistical     | 20a | Statistical methods for analysing primary and secondary outcomes.          |
| 49 | methods         |     | Reference to where other details of the statistical analysis plan can be   |
| 50 |                 |     | found, if not in the protocol <b>(P12-P14)</b>                             |
| 51 |                 |     |                                                                            |
| 52 |                 |     |                                                                            |
| 53 |                 | 20b | Methods for any additional analyses (eg, subgroup and adjusted             |
| 54 |                 |     | analyses) <b>(Not applicable)</b>                                          |
| 55 |                 |     |                                                                            |
| 56 |                 | 20c | Definition of analysis population relating to protocol non-adherence       |
| 57 |                 |     | (eg, as randomised analysis), and any statistical methods to handle        |
| 58 |                 |     | missing data (eg, multiple imputation) <b>(Not applicable)</b>             |
| 59 |                 |     |                                                                            |
| 60 |                 |     |                                                                            |

## Methods: Monitoring

|                 |     |                                                                                                                                                                                                                                                                                                                                       |
|-----------------|-----|---------------------------------------------------------------------------------------------------------------------------------------------------------------------------------------------------------------------------------------------------------------------------------------------------------------------------------------|
| Data monitoring | 21a | Composition of data monitoring committee (DMC); summary of its role and reporting structure; statement of whether it is independent from the sponsor and competing interests; and reference to where further details about its charter can be found, if not in the protocol. Alternatively, an explanation of why a DMC is not needed |
|                 | 21b | Description of any interim analyses and stopping guidelines, including who will have access to these interim results and make the final decision to terminate the trial                                                                                                                                                               |
| Harms           | 22  | Plans for collecting, assessing, reporting, and managing solicited and spontaneously reported adverse events and other unintended effects of trial interventions or trial conduct <b>(P11-12)</b>                                                                                                                                     |
| Auditing        | 23  | Frequency and procedures for auditing trial conduct, if any, and whether the process will be independent from investigators and the sponsor                                                                                                                                                                                           |

## Ethics and dissemination

|                               |     |                                                                                                                                                                                                                                                          |
|-------------------------------|-----|----------------------------------------------------------------------------------------------------------------------------------------------------------------------------------------------------------------------------------------------------------|
| Research ethics approval      | 24  | Plans for seeking research ethics committee/institutional review board (REC/IRB) approval <b>(P14)</b>                                                                                                                                                   |
| Protocol amendments           | 25  | Plans for communicating important protocol modifications (eg, changes to eligibility criteria, outcomes, analyses) to relevant parties (eg, investigators, REC/IRBs, trial participants, trial registries, journals, regulators) <b>(Not applicable)</b> |
| Consent or assent             | 26a | Who will obtain informed consent or assent from potential trial participants or authorised surrogates, and how (see Item 32) <b>(P8)</b>                                                                                                                 |
|                               | 26b | Additional consent provisions for collection and use of participant data and biological specimens in ancillary studies, if applicable <b>(Not applicable)</b>                                                                                            |
| Confidentiality               | 27  | How personal information about potential and enrolled participants will be collected, shared, and maintained in order to protect confidentiality before, during, and after the trial <b>(P11-12)</b>                                                     |
| Declaration of interests      | 28  | Financial and other competing interests for principal investigators for the overall trial and each study site <b>(P18)</b>                                                                                                                               |
| Access to data                | 29  | Statement of who will have access to the final trial dataset, and disclosure of contractual agreements that limit such access for investigators <b>(P11-12)</b>                                                                                          |
| Ancillary and post-trial care | 30  | Provisions, if any, for ancillary and post-trial care, and for compensation to those who suffer harm from trial participation <b>(Not applicable)</b>                                                                                                    |

- 1  
2  
3  
4  
5  
6  
7  
8  
9  
10  
11  
12  
13  
14  
15
- |                         |     |                                                                                                                                                                                                                                                                                                  |
|-------------------------|-----|--------------------------------------------------------------------------------------------------------------------------------------------------------------------------------------------------------------------------------------------------------------------------------------------------|
| Dissemination<br>policy | 31a | Plans for investigators and sponsor to communicate trial results to participants, healthcare professionals, the public, and other relevant groups (eg, via publication, reporting in results databases, or other data sharing arrangements), including any publication restrictions <b>(P14)</b> |
|                         | 31b | Authorship eligibility guidelines and any intended use of professional writers <b>(Not applicable)</b>                                                                                                                                                                                           |
|                         | 31c | Plans, if any, for granting public access to the full protocol, participant-level dataset, and statistical code <b>(Not applicable)</b>                                                                                                                                                          |

## 16 Appendices

- 17  
18  
19  
20  
21  
22  
23  
24
- |                               |    |                                                                                                                                                                                                                        |
|-------------------------------|----|------------------------------------------------------------------------------------------------------------------------------------------------------------------------------------------------------------------------|
| Informed consent<br>materials | 32 | Model consent form and other related documentation given to participants and authorised surrogates <b>(see ICF)</b>                                                                                                    |
| Biological<br>specimens       | 33 | Plans for collection, laboratory evaluation, and storage of biological specimens for genetic or molecular analysis in the current trial and for future use in ancillary studies, if applicable <b>(Not applicable)</b> |

---

25 \*It is strongly recommended that this checklist be read in conjunction with the SPIRIT 2013  
26 Explanation & Elaboration for important clarification on the items. Amendments to the  
27 protocol should be tracked and dated. The SPIRIT checklist is copyrighted by the SPIRIT  
28 Group under the Creative Commons "[Attribution-NonCommercial-NoDerivs 3.0 Unported](https://creativecommons.org/licenses/by-nc-nd/3.0/)"  
29 license.  
30  
31  
32  
33  
34  
35  
36  
37  
38  
39  
40  
41  
42  
43  
44  
45  
46  
47  
48  
49  
50  
51  
52  
53  
54  
55  
56  
57  
58  
59  
60
