# Supplementary material for: Machine learning for prediction of sudden cardiac death in heart failure patients with low left ventricular ejection fraction: study protocol for a retroprospective multicentre registry in China
Source: PubMed Central journal article supplement — BMJ Open. 2019 May 16;9(5):e023724. doi: 10.1136/bmjopen-2018-023724 (PMC6530409; doi:10.1136/bmjopen-2018-023724), 2019-05-16
Supplement: bmjopen-2018-023724supp001.pdf [file bmjopen-2018-023724supp001.pdf]

## **List of Hospitals**

The First Affiliated Hospital of Nanjing Medical University, Nanjing

Xiamen Cardiovascular Hospital, Xiamen University, Xiamen

Wuhan Asia Heart Hospital, Wuhan

Jiangning Hospital Affiliated to Nanjing Medical University, Nanjing

The Second People's Hospital of Lianyungang, Lianyungang

The Affiliated Hospital of Jiangsu University, Zhenjiang

Taixing People's Hospital, Taixing

The First People's Hospital of Huaian, Huaian

The First People's Hospital of Yancheng, Yancheng

Rugao People's Hospital, Rugao

The First People's Hospital of Zhangjiagang, Zhangjiagang

The Third People's Hospital of Suzhou, Suzhou

The Third People's Hospital of Wuxi, Wuxi

The Second Affiliated Hospital of Nanjing Medical University, Nanjing
